# Supplementary material for: A sister of NANOG regulates genes expressed in pre-implantation human development
Source: Open Biol. 2017 Apr 29;7(4):170027. doi: 10.1098/rsob.170027 (PMC5413911; doi:10.1098/rsob.170027)
Supplement: Expression analysis of NANOGNB-responsive genes [file rsob170027supp3.xlsx]

## Sheet: Up Regulated Genes
All significantly up regulated genes determined by DESeq2, fold change greater than 1.3, going up to an FPKM of at least 2
Gene Symbol	Gene_ID	baseMean	log2FoldChange	lfcSE	stat	pvalue	padj
METTL7A	25840	1073.93	2.98399	0.102784	29.0318	2.61249e-185	3.83513e-182
ABCA1	19	1314.97	2.65417	0.0895163	29.6501	3.38284e-193	5.46261e-190
SDPR	8436	1041.56	2.42129	0.0944018	25.6488	4.3639e-145	3.35563e-142
COLEC12	81035	3101.67	2.22071	0.0880747	25.2139	2.81895e-140	1.89668e-137
HGF	3082	1239.7	2.09091	0.104112	20.0833	1.03247e-89	2.92497e-87
CLDN11	5010	11684.5	1.94048	0.0671943	28.8787	2.21177e-183	2.97631e-180
PLCXD3	345557	487.183	1.92656	0.130645	14.7465	3.23813e-49	3.04008e-47
VIT	5212	147.032	1.86838	0.166233	11.2395	2.60816e-29	1.06895e-27
PSMB9	5698	337.459	1.81376	0.117321	15.4597	6.48634e-54	7.42847e-52
RGS4	5999	1651.82	1.79121	0.0704727	25.4171	1.63213e-142	1.14589e-139
GPR1	2825	296.883	1.77881	0.119118	14.9331	2.00578e-50	2.01176e-48
APOL3	80833	219.612	1.75277	0.13979	12.5386	4.59074e-36	2.53008e-34
CEND1	51286	282.542	1.74655	0.124653	14.0113	1.32996e-44	1.06847e-42
FAM198B	51313	966.317	1.69801	0.0927909	18.2993	8.38699e-75	1.65162e-72
TNFRSF19	55504	889.826	1.69294	0.0875419	19.3387	2.5392e-83	6.11986e-81
ROR2	4920	412.379	1.6247	0.105377	15.4179	1.24057e-53	1.41076e-51
DPP4	1803	2186.35	1.61134	0.0742076	21.714	1.51416e-104	5.82159e-102
FAM129A	116496	1898.29	1.56338	0.070752	22.0967	3.40302e-108	1.40902e-105
NTN4	59277	361.347	1.55801	0.10954	14.2232	6.57767e-46	5.44698e-44
SLIT2	9353	3357.75	1.55453	0.0671705	23.1431	1.70586e-118	9.18208e-116
GGT5	2687	161.546	1.55044	0.149153	10.3949	2.61457e-25	8.377e-24
ACPP	55	212.447	1.54536	0.141617	10.9123	1.00681e-27	3.74609e-26
ANK2	287	750.771	1.53991	0.0851786	18.0786	4.6974e-73	8.82018e-71
MBP	4155	463.162	1.5254	0.106725	14.2929	2.42468e-46	2.03926e-44
APOL1	8542	555.172	1.51644	0.104349	14.5323	7.55982e-48	6.782e-46
ROR1	4919	1519.56	1.47576	0.0675295	21.8536	7.18478e-106	2.82975e-103
TNFSF4	7292	218.98	1.45957	0.135756	10.7514	5.83548e-27	2.06196e-25
TMEM119	338773	2888.67	1.45172	0.0740031	19.617	1.10599e-85	2.79056e-83
APOL6	80830	1949.98	1.43558	0.0858322	16.7254	8.55803e-63	1.27958e-60
C1R	715	2884.24	1.42538	0.0717473	19.8666	7.91653e-88	2.09567e-85
BATF2	116071	198.243	1.42046	0.15058	9.43321	3.97711e-21	9.59976e-20
CFH	3075	2191.08	1.41849	0.0658678	21.5354	7.24987e-103	2.6607e-100
BST2	684	373.902	1.41321	0.149559	9.44913	3.41658e-21	8.28393e-20
RDH5	5959	476.706	1.406	0.0967896	14.5263	8.25301e-48	7.36296e-46
ALDH1A2	8854	258.781	1.40441	0.122462	11.4681	1.90796e-30	8.37219e-29
FABP3	2170	268.827	1.40197	0.133293	10.5179	7.14409e-26	2.36885e-24
HSPA1A	3303	2110.4	1.4015	0.086515	16.1995	5.08004e-59	7.19583e-57
TCN2	6948	254.906	1.3996	0.12755	10.9729	5.1564e-28	1.94546e-26
EVI2B	2124	360.216	1.37968	0.109108	12.6451	1.19087e-36	6.81921e-35
CDKN2A	1029	469.161	1.37852	0.102507	13.448	3.16198e-41	2.21998e-39
GMPR	2766	104.735	1.3742	0.187941	7.31188	2.63436e-13	3.38962e-12
RARRES3	5920	71.5729	1.37071	0.202249	6.77733	1.22418e-11	1.33298e-10
ATP6V0E2	155066	426.411	1.36303	0.100837	13.5172	1.2387e-41	8.92967e-40
RCAN2	10231	324.245	1.36046	0.116606	11.6672	1.87563e-31	8.62898e-30
GLT8D2	83468	508.201	1.35495	0.101953	13.29	2.64536e-40	1.76517e-38
CTSK	1513	9270.29	1.34157	0.0716629	18.7206	3.36367e-78	7.2422e-76
RTP4	64108	61.8455	1.33054	0.225736	5.89424	3.76403e-09	3.0406e-08
LGALS9	3965	82.1805	1.32363	0.201238	6.57743	4.78655e-11	4.87655e-10
PTX3	5806	4769.46	1.32314	0.0839954	15.7525	6.60061e-56	8.13639e-54
C1S	716	2374.86	1.31314	0.0804814	16.3161	7.58249e-60	1.08356e-57
MOCOS	55034	842.632	1.29745	0.0868688	14.9357	1.92896e-50	1.9468e-48
PGPEP1	54858	329.45	1.29619	0.116061	11.1682	5.83506e-29	2.33229e-27
BTN3A3	10384	412.443	1.28697	0.119695	10.7521	5.79075e-27	2.05064e-25
OLFML2A	169611	670.078	1.26411	0.11511	10.9817	4.67921e-28	1.77371e-26
RNF157	114804	619.551	1.25467	0.109044	11.5061	1.22913e-30	5.46777e-29
PDE7B	27115	275.362	1.25367	0.125464	9.99226	1.64788e-23	4.61178e-22
CNR1	1268	1007.72	1.24517	0.0814184	15.2935	8.45396e-53	9.2867e-51
SAMHD1	25939	2858.28	1.23444	0.091456	13.4976	1.6147e-41	1.14864e-39
CASP1	834	622.438	1.20697	0.0887161	13.6049	3.74607e-42	2.81356e-40
TLDC2	140711	856.367	1.20476	0.104153	11.5671	6.04724e-31	2.72768e-29
DOCK4	9732	1217.89	1.20379	0.0715725	16.8192	1.76565e-63	2.66464e-61
LRIG1	26018	583.851	1.20309	0.100705	11.9467	6.75797e-33	3.32706e-31
CYFIP2	26999	541.63	1.19701	0.0901799	13.2736	3.2927e-40	2.17912e-38
GALM	130589	305.824	1.18928	0.115673	10.2814	8.54377e-25	2.65317e-23
MCC	4163	601.075	1.1821	0.0873296	13.5361	9.57437e-42	6.96428e-40
IL20RB	53833	575.717	1.1788	0.101071	11.6632	1.96629e-31	9.01748e-30
ENPP5	59084	209.107	1.16504	0.166327	7.00449	2.47895e-12	2.9134e-11
SYT7	9066	577.764	1.16397	0.110963	10.4898	9.62685e-26	3.17254e-24
LGALS3BP	3959	3181.74	1.15668	0.0776717	14.8919	3.72147e-50	3.68677e-48
RPS6KA2	6196	6773.78	1.15206	0.0599457	19.2184	2.59877e-82	5.995e-80
ZNF219	51222	408.378	1.14879	0.107535	10.6829	1.22395e-26	4.25038e-25
LAMA5	3911	982.002	1.14839	0.0767853	14.9558	1.42688e-50	1.44914e-48
SEPP1	6414	63.0631	1.14605	0.209518	5.46995	4.50151e-08	3.13456e-07
TGFBR3	7049	2418.41	1.13949	0.0637123	17.8849	1.5458e-71	2.83655e-69
LIPA	3988	4539.16	1.12962	0.0717521	15.7433	7.6338e-56	9.26846e-54
LUM	4060	1410.42	1.11776	0.0775035	14.422	3.76093e-47	3.31866e-45
CCL2	6347	167.04	1.11181	0.153257	7.25456	4.02961e-13	5.06777e-12
VAMP5	10791	1276.25	1.1062	0.0750427	14.741	3.5167e-49	3.28253e-47
SGCD	6444	270.045	1.10434	0.127891	8.63498	5.87348e-18	1.13996e-16
PSAT1	29968	3289.2	1.09596	0.0670417	16.3474	4.54205e-60	6.54866e-58
APOD	347	3217.24	1.09122	0.0721711	15.1199	1.19758e-51	1.25574e-49
PRKG2	5593	388.035	1.08814	0.1068	10.1886	2.22973e-24	6.6925e-23
SCD	6319	22082.6	1.08812	0.0806043	13.4996	1.57328e-41	1.12413e-39
SREBF1	6720	2859.31	1.08183	0.0626615	17.2646	8.6852e-67	1.3886e-64
HSPA4L	22824	375.635	1.07525	0.106363	10.1093	5.02578e-24	1.46491e-22
UBA7	7318	645.488	1.07401	0.101327	10.5995	2.99676e-26	1.01663e-24
CBS	875	81.6876	1.0724	0.195863	5.47529	4.36795e-08	3.04813e-07
SEMA5A	9037	1823.66	1.0628	0.165193	6.43368	1.24551e-10	1.22339e-09
TMCC3	57458	705.957	1.05989	0.081995	12.9263	3.19875e-38	1.94186e-36
AIM1	202	8803.98	1.0579	0.0543916	19.4497	2.93415e-84	7.28933e-82
NRROS	375387	184.814	1.05379	0.140401	7.50555	6.11704e-14	8.22465e-13
TMEM171	134285	172.487	1.04789	0.155075	6.7573	1.40587e-11	1.51751e-10
MRGPRF	116535	1221.99	1.04758	0.075	13.9677	2.45448e-44	1.95246e-42
CORIN	10699	213.061	1.04537	0.137723	7.59043	3.18836e-14	4.40048e-13
OAS3	4940	4498.07	1.04344	0.179057	5.8274	5.62975e-09	4.43893e-08
EFEMP1	2202	576.578	1.04238	0.0994315	10.4834	1.02925e-25	3.38501e-24
NMI	9111	350.657	1.03847	0.108787	9.54591	1.34914e-21	3.32103e-20
DGAT2	84649	131.132	1.02393	0.161295	6.34819	2.17863e-10	2.07677e-09
CEP70	80321	332.422	1.01113	0.124972	8.0909	5.92239e-16	9.56348e-15
RASGRP3	25780	514.987	1.01044	0.0945051	10.6919	1.11036e-26	3.86425e-25
UBE2L6	9246	2412.66	1.01034	0.076244	13.2514	4.42707e-40	2.91789e-38
ARHGAP6	395	407.303	1.00885	0.103348	9.76169	1.64393e-22	4.30945e-21
HNMT	3176	268.485	0.998823	0.123415	8.09324	5.80986e-16	9.40056e-15
ADORA2B	136	246.062	0.988876	0.123357	8.01637	1.08915e-15	1.70919e-14
SLC25A23	79085	707.134	0.986957	0.0877658	11.2454	2.44124e-29	1.00308e-27
ARL4C	10123	700.464	0.981573	0.092038	10.6649	1.48616e-26	5.1279e-25
ASS1	445	1759.6	0.979627	0.0900858	10.8744	1.52693e-27	5.65523e-26
EPHA4	2043	708.767	0.97536	0.0902724	10.8046	3.2729e-27	1.17708e-25
METTL7B	196410	328.183	0.970905	0.110596	8.77887	1.65125e-18	3.34979e-17
DAAM2	23500	595.394	0.966083	0.0944217	10.2316	1.43166e-24	4.36198e-23
S100A4	6275	10257.3	0.964857	0.067092	14.3811	6.79981e-47	5.93532e-45
ABI3BP	25890	5737.6	0.963341	0.0692073	13.9197	4.81205e-44	3.75386e-42
OAS2	4939	4896.44	0.963283	0.201827	4.77281	1.81675e-06	1.0016e-05
CYP7B1	9420	236.983	0.958025	0.138139	6.93524	4.05529e-12	4.64761e-11
THSD4	79875	700.543	0.957481	0.0890395	10.7534	5.70894e-27	2.02611e-25
CRABP2	1382	869.778	0.955822	0.0841022	11.365	6.24604e-30	2.65424e-28
IFITM2	10581	6591.31	0.955791	0.0495793	19.278	8.21692e-83	1.923e-80
XAF1	54739	1165.86	0.955762	0.175823	5.43592	5.45139e-08	3.74273e-07
NDC80	10403	1531.54	0.953362	0.0815213	11.6946	1.35768e-31	6.2819e-30
ASPM	259266	4340.11	0.952008	0.0715697	13.3018	2.25876e-40	1.51977e-38
TPK1	27010	155.615	0.942743	0.149371	6.31142	2.76482e-10	2.60632e-09
COL10A1	1300	339.843	0.938527	0.121448	7.72779	1.0943e-14	1.57354e-13
TOP2A	7153	11885.4	0.937448	0.0703155	13.332	1.50738e-40	1.02274e-38
TMEM173	340061	2201.5	0.937053	0.0701776	13.3526	1.14398e-40	7.89447e-39
FBXL14	144699	293.315	0.936	0.122601	7.63456	2.266e-14	3.17358e-13
DMKN	93099	324.021	0.935059	0.109233	8.56021	1.12658e-17	2.12772e-16
GAMT	2593	395.985	0.93024	0.0991487	9.38228	6.45643e-21	1.52648e-19
ASAP3	55616	330.79	0.926725	0.116385	7.96256	1.68518e-15	2.61908e-14
QPRT	23475	622.8	0.926581	0.0985511	9.40204	5.35131e-21	1.275e-19
ACSS3	79611	306.127	0.924022	0.111119	8.31564	9.1261e-17	1.5829e-15
PLAU	5328	1720.75	0.923143	0.0713148	12.9446	2.51991e-38	1.5472e-36
RAET1E	135250	191.393	0.919964	0.139944	6.5738	4.90466e-11	4.99057e-10
IFI44L	10964	1702.23	0.918381	0.238072	3.85758	0.000114516	0.000454172
CIT	11113	3181.77	0.916683	0.0674762	13.5853	4.89675e-42	3.62719e-40
RAB30	27314	360.726	0.914541	0.109295	8.36761	5.88008e-17	1.03886e-15
RRAD	6236	371.697	0.911876	0.125227	7.28179	3.29415e-13	4.1885e-12
FLVCR2	55640	560.881	0.910818	0.0875828	10.3995	2.49193e-25	7.99993e-24
SV2A	9900	1060.26	0.907303	0.0898584	10.097	5.69406e-24	1.64192e-22
MYLK	4638	1557.16	0.905288	0.0771914	11.7278	9.17731e-32	4.2831e-30
SYT11	23208	1306.56	0.902627	0.0703882	12.8236	1.21004e-37	7.23691e-36
MOXD1	26002	2577.56	0.900558	0.0683923	13.1675	1.34914e-39	8.71438e-38
NOVA1	4857	259.998	0.900294	0.123088	7.31423	2.58861e-13	3.33607e-12
TRIM22	10346	2892.89	0.896015	0.0847235	10.5758	3.86042e-26	1.29601e-24
CARD16	114769	118.84	0.89421	0.16093	5.55652	2.75212e-08	1.96991e-07
KIF20A	10112	3177.9	0.893551	0.087295	10.236	1.36786e-24	4.18338e-23
SIAE	54414	1364.07	0.890255	0.0698821	12.7394	3.57194e-37	2.09744e-35
C1RL	51279	536.892	0.888596	0.101838	8.72561	2.64742e-18	5.24546e-17
ATL1	51062	318.051	0.885826	0.125685	7.04797	1.8155e-12	2.1604e-11
IL31RA	133396	245.621	0.88478	0.13211	6.69732	2.12282e-11	2.24195e-10
WISP1	8840	342.918	0.883231	0.243497	3.62727	0.000286433	0.00104716
DDR2	4921	12943.9	0.882396	0.0444658	19.8444	1.23201e-87	3.2088e-85
IFITM3	10410	15830.6	0.882282	0.0562586	15.6826	1.98866e-55	2.39648e-53
IFI30	10437	452.895	0.881222	0.0996939	8.83928	9.6341e-19	1.98941e-17
SIX1	6495	482.315	0.880435	0.099698	8.83102	1.03727e-18	2.13374e-17
PPFIBP2	8495	354.638	0.8761	0.106245	8.246	1.63791e-16	2.78704e-15
CPNE3	8895	14300.5	0.87562	0.0515744	16.9778	1.1991e-64	1.8441e-62
IFITM1	8519	3167.66	0.87382	0.152337	5.73609	9.68882e-09	7.41845e-08
ZCCHC24	219654	2348.84	0.872745	0.0689123	12.6646	9.2914e-37	5.33942e-35
LPIN1	23175	4017.51	0.871663	0.0549861	15.8524	1.35304e-56	1.70695e-54
CENPF	1063	4874.6	0.871461	0.0705149	12.3585	4.38063e-35	2.3346e-33
APCDD1	147495	332.57	0.869786	0.10917	7.96726	1.62231e-15	2.5238e-14
FAM26E	254228	787.552	0.86944	0.107448	8.09174	5.88168e-16	9.50725e-15
DPYSL2	1808	5403.51	0.865714	0.0817718	10.587	3.42569e-26	1.15728e-24
C10orf54	64115	363.556	0.865686	0.152494	5.67683	1.3721e-08	1.02388e-07
NFIB	4781	435.497	0.864341	0.125586	6.88245	5.88321e-12	6.63886e-11
IFI35	3430	1109.23	0.863011	0.09293	9.28667	1.59191e-20	3.68284e-19
TTC39B	158219	553.392	0.862959	0.0996212	8.66241	4.61908e-18	9.01921e-17
GPM6B	2824	2960.05	0.862541	0.0763748	11.2935	1.41259e-29	5.84885e-28
SDC1	6382	1170.39	0.860526	0.0669651	12.8504	8.55963e-38	5.1575e-36
GALNT12	79695	204.411	0.860156	0.147306	5.83924	5.2438e-09	4.15899e-08
PARP9	83666	2936.08	0.85932	0.173017	4.96667	6.81116e-07	4.00097e-06
RAB38	23682	605.76	0.859164	0.088028	9.76012	1.66959e-22	4.36962e-21
CYP2U1	113612	507.236	0.858034	0.0959162	8.94566	3.69737e-19	7.88708e-18
PLA2G16	11145	342.779	0.855363	0.110279	7.75634	8.74125e-15	1.26823e-13
ADAMTSL1	92949	2640.94	0.853006	0.0640925	13.309	2.05288e-40	1.38702e-38
ACADSB	36	1188.25	0.851787	0.0722163	11.7949	4.14508e-32	1.9629e-30
PC	5091	576.394	0.850381	0.0950636	8.94539	3.70635e-19	7.8958e-18
KIAA1377	57562	504.049	0.849354	0.101678	8.35334	6.63568e-17	1.16344e-15
FLT3LG	2323	95.3829	0.849075	0.183273	4.63283	3.60698e-06	1.8954e-05
EPSTI1	94240	841.338	0.848331	0.104799	8.09481	5.73553e-16	9.2896e-15
FAM63A	55793	193.957	0.845936	0.137034	6.1732	6.69207e-10	6.00353e-09
CASP9	842	191.714	0.845816	0.133054	6.35695	2.05805e-10	1.9688e-09
IDH1	3417	4288.34	0.84558	0.0621891	13.5969	4.17694e-42	3.12265e-40
PSMB8	5696	1130.54	0.844955	0.0763447	11.0676	1.80098e-28	6.99092e-27
CYP4V2	285440	443.271	0.842277	0.104455	8.06356	7.41026e-16	1.18359e-14
FAM102A	399665	1025.24	0.840002	0.0726237	11.5665	6.09171e-31	2.74008e-29
CENPE	1062	2998.23	0.839817	0.0667759	12.5767	2.83801e-36	1.58354e-34
PBX1	5087	2364.99	0.837726	0.0635342	13.1854	1.06445e-39	6.90314e-38
THSD1	55901	420.987	0.836872	0.100749	8.3065	9.85658e-17	1.70229e-15
ANKRD29	147463	302.177	0.835066	0.118367	7.05488	1.72749e-12	2.06176e-11
SBSN	374897	917.733	0.835045	0.0822034	10.1583	3.04408e-24	9.00289e-23
VEPH1	79674	1064.45	0.831499	0.076586	10.8571	1.84592e-27	6.77452e-26
LINC01272	100506115	200.252	0.826379	0.139703	5.91526	3.31353e-09	2.70784e-08
KIF14	9928	1343.39	0.826177	0.0776342	10.6419	1.90173e-26	6.53387e-25
CC2D2A	57545	887.948	0.825949	0.0778772	10.6058	2.80067e-26	9.54119e-25
PRR19	284338	32.0191	0.825591	0.249601	3.30764	0.000940862	0.00305142
OLFML2B	25903	1334.55	0.82499	0.0876548	9.41181	4.87679e-21	1.16667e-19
MX2	4600	2528.97	0.824866	0.194881	4.23267	2.30932e-05	0.00010573
TMEM51	55092	247.181	0.823369	0.123191	6.68371	2.32972e-11	2.44924e-10
EFNA5	1946	219.552	0.823004	0.128345	6.41243	1.43218e-10	1.39067e-09
ACKR4	51554	90.0426	0.822426	0.22494	3.6562	0.000255981	0.000946117
IFI27	3429	1195.96	0.817303	0.191118	4.27644	1.89908e-05	8.81468e-05
DLGAP5	9787	2877.92	0.816096	0.0673101	12.1244	7.84154e-34	4.03265e-32
RASD1	51655	412.076	0.813773	0.112214	7.25196	4.10784e-13	5.15812e-12
MAN1A1	4121	10412.3	0.810544	0.077547	10.4523	1.43018e-25	4.6468e-24
SLC18B1	116843	628.824	0.805374	0.0854226	9.42812	4.17514e-21	1.00477e-19
DEPDC1B	55789	620.799	0.804731	0.105348	7.63882	2.19221e-14	3.07557e-13
NEFH	4744	258.227	0.803457	0.116977	6.86849	6.4883e-12	7.2759e-11
TMSB4X	7114	16763.2	0.801633	0.0498493	16.0811	3.45935e-58	4.69425e-56
TP53I3	9540	1322.55	0.800055	0.0738309	10.8363	2.3161e-27	8.42349e-26
KIAA0754	643314	1659.62	0.799094	0.0912778	8.75453	2.04951e-18	4.10614e-17
LMLN	89782	563.013	0.796755	0.0950634	8.3813	5.23462e-17	9.30932e-16
ARMC9	80210	1471.8	0.796152	0.0649444	12.259	1.50383e-34	7.80829e-33
FOS	2353	851.412	0.795378	0.115283	6.89935	5.22426e-12	5.92425e-11
ADAM33	80332	2645.09	0.794287	0.0773292	10.2715	9.4725e-25	2.93593e-23
TP53	7157	719.315	0.794141	0.0796767	9.96705	2.12448e-23	5.91484e-22
CNKSR3	154043	364.812	0.793856	0.10143	7.82665	5.01035e-15	7.43632e-14
ALDH4A1	8659	424.305	0.793158	0.104162	7.61466	2.64395e-14	3.66477e-13
MNS1	55329	161.917	0.792268	0.148463	5.33648	9.47685e-08	6.27695e-07
ADD3	120	3629.61	0.791439	0.070164	11.2798	1.65059e-29	6.81682e-28
ETV1	2115	3788.16	0.790312	0.0851549	9.28088	1.6809e-20	3.8776e-19
FAM83D	81610	1502.83	0.789461	0.0959957	8.22392	1.96952e-16	3.32675e-15
XG	7499	1111.25	0.789027	0.0676525	11.6629	1.97125e-31	9.01748e-30
TBC1D8	11138	1615.57	0.788916	0.0632696	12.4691	1.10035e-35	6.00284e-34
GTDC1	79712	760.42	0.78819	0.0775147	10.1683	2.74742e-24	8.17042e-23
NOV	4856	356.247	0.788128	0.115282	6.83652	8.11397e-12	8.98659e-11
HIST1H2BK	85236	1795.44	0.788052	0.0590866	13.3372	1.40567e-40	9.57755e-39
LRRC8B	23507	1275.93	0.787908	0.0772824	10.1952	2.08346e-24	6.27682e-23
NREP	9315	2516.49	0.787681	0.0791768	9.94838	2.56313e-23	7.07512e-22
CDA	978	195.26	0.784528	0.13896	5.64573	1.64482e-08	1.21281e-07
HSPA1B	3304	2107.34	0.784223	0.196868	3.9835	6.79083e-05	0.000282625
SNX21	90203	1021.26	0.783262	0.0797513	9.8213	9.11565e-23	2.43708e-21
SLC16A4	9122	346.352	0.782759	0.116668	6.70928	1.95581e-11	2.07331e-10
KIAA1217	56243	976.203	0.780905	0.0853138	9.15332	5.52097e-20	1.23995e-18
TEC	7006	316.058	0.778309	0.11218	6.93802	3.97625e-12	4.56026e-11
GPSM2	29899	1543.71	0.77621	0.0698491	11.1127	1.08847e-28	4.27654e-27
2006-09-01	23157	615.289	0.775051	0.0942754	8.22114	2.01581e-16	3.39429e-15
KCTD12	115207	14452.4	0.773667	0.0529345	14.6156	2.23475e-48	2.0388e-46
FADS2	9415	9296.23	0.773101	0.13658	5.66042	1.51e-08	1.12108e-07
CKAP2	26586	4091.13	0.769703	0.0736421	10.4519	1.43559e-25	4.655e-24
CTSS	1520	260.533	0.764167	0.120877	6.32185	2.58452e-10	2.44779e-09
SULT1B1	27284	888.342	0.764008	0.185368	4.12158	3.76276e-05	0.000165561
GTF3A	2971	4056.76	0.762678	0.0530963	14.364	8.70106e-47	7.47366e-45
MKI67	4288	11230.8	0.762348	0.0710981	10.7225	7.98312e-27	2.80242e-25
LAMA4	3910	11845.1	0.762013	0.0478314	15.9312	3.84696e-57	5.05046e-55
ALDH7A1	501	1488.24	0.761499	0.0679409	11.2083	3.71448e-29	1.50329e-27
NNMT	4837	2547.58	0.760267	0.0735386	10.3383	4.72638e-25	1.49066e-23
STRADB	55437	1094.76	0.759524	0.075515	10.0579	8.47731e-24	2.41858e-22
ANPEP	290	101437	0.759004	0.0536443	14.1488	1.89897e-45	1.54872e-43
S100A3	6274	386.388	0.757715	0.101308	7.47935	7.46898e-14	9.97594e-13
CDK15	65061	569.492	0.757524	0.0914626	8.28233	1.20784e-16	2.07491e-15
KIF18A	81930	1001.15	0.752668	0.0865577	8.69556	3.4512e-18	6.78806e-17
RASL11A	387496	191.929	0.751148	0.136602	5.49881	3.82373e-08	2.69044e-07
DZIP3	9666	495.593	0.749836	0.0927981	8.08029	6.46128e-16	1.03612e-14
TRIM47	91107	391.926	0.749226	0.107448	6.97291	3.10448e-12	3.60396e-11
IL17RD	54756	1054.86	0.74872	0.0866273	8.643	5.4756e-18	1.06402e-16
SAMD9L	219285	1971.21	0.74799	0.172435	4.3378	1.43915e-05	6.81308e-05
CARD10	29775	508.537	0.747802	0.0970477	7.70551	1.30318e-14	1.86228e-13
KIF23	9493	3182.98	0.745274	0.0744351	10.0124	1.34438e-23	3.78205e-22
CELF2	10659	868.686	0.742359	0.0831678	8.92604	4.41524e-19	9.35659e-18
PTGFR	5737	858.927	0.742117	0.0952265	7.79318	6.53445e-15	9.57516e-14
C9orf9	11092	107.274	0.741455	0.175683	4.22041	2.43853e-05	0.000111173
SYTL2	54843	419.963	0.741303	0.108399	6.83867	7.99312e-12	8.85881e-11
UBE2C	11065	2331.63	0.741257	0.082245	9.01279	2.00882e-19	4.36001e-18
TTC28	23331	1283.69	0.739767	0.0675315	10.9544	6.32923e-28	2.37133e-26
COL3A1	1281	25747.9	0.739415	0.0770976	9.59064	8.75439e-22	2.18494e-20
SUGCT	79783	351.539	0.738912	0.108241	6.82653	8.69925e-12	9.6216e-11
PPARG	5468	1840.77	0.737826	0.0617903	11.9408	7.25132e-33	3.53759e-31
OAS1	4938	1090.77	0.737293	0.219967	3.35184	0.000802765	0.00264552
CCDC152	100129792	224.45	0.736522	0.137688	5.34922	8.83363e-08	5.8726e-07
PROS1	5627	1738.32	0.735993	0.0801274	9.18529	4.10437e-20	9.29557e-19
ARL6IP1	23204	5647.93	0.735388	0.0749896	9.80653	1.05535e-22	2.80292e-21
RAB7B	338382	899.711	0.735056	0.088945	8.26417	1.40675e-16	2.40128e-15
MDK	4192	395.201	0.734611	0.106828	6.8766	6.12997e-12	6.89322e-11
IFI6	2537	4269.57	0.732314	0.207017	3.53746	0.000404	0.00142565
DHCR7	1717	2945.41	0.731471	0.0662082	11.0481	2.24026e-28	8.63382e-27
RECK	8434	2991.37	0.727419	0.0725296	10.0293	1.13351e-23	3.21121e-22
HACD4	401494	1321.47	0.725482	0.0749722	9.67668	3.78807e-22	9.65125e-21
FYCO1	79443	2619.55	0.725145	0.0640255	11.3259	9.76847e-30	4.08656e-28
NT5DC1	221294	816.838	0.722926	0.0781738	9.24767	2.2943e-20	5.27755e-19
APH1B	83464	871.636	0.722416	0.0941448	7.67346	1.67419e-14	2.37148e-13
AURKA	6790	3300.39	0.721293	0.144222	5.00125	5.69588e-07	3.39274e-06
NUDT7	283927	121.436	0.721152	0.158933	4.53747	5.69337e-06	2.89838e-05
LNX1	84708	303.729	0.720873	0.110424	6.52825	6.6542e-11	6.6699e-10
TYMP	1890	767.838	0.719447	0.104047	6.91461	4.69142e-12	5.34253e-11
KPNA2	3838	12410.8	0.718628	0.0661422	10.8649	1.69416e-27	6.24597e-26
PTPN13	5783	3840.44	0.718286	0.0745096	9.64018	5.40915e-22	1.36055e-20
USP53	54532	2815.24	0.71788	0.0600657	11.9516	6.37055e-33	3.14592e-31
TNFRSF21	27242	2516.45	0.717305	0.0570667	12.5696	3.10275e-36	1.72176e-34
GPNMB	10457	12124.7	0.716431	0.0632394	11.3289	9.44218e-30	3.97063e-28
PSME1	5720	2271.5	0.71574	0.0609609	11.741	7.8595e-32	3.6894e-30
MARCKS	4082	2186.05	0.715608	0.057858	12.3683	3.87709e-35	2.07309e-33
SLC15A3	51296	180.027	0.714347	0.143145	4.99038	6.02602e-07	3.56963e-06
ALDH6A1	4329	365.932	0.71411	0.115046	6.20716	5.39499e-10	4.91084e-09
HMMR	3161	2622.84	0.713915	0.0696026	10.257	1.10058e-24	3.38519e-23
TTK	7272	1723.37	0.711264	0.0866111	8.21216	2.17237e-16	3.64272e-15
CTSL	1514	18564	0.711078	0.0587072	12.1123	9.09358e-34	4.64693e-32
ALDH1L2	160428	4984.51	0.710789	0.0706215	10.0648	7.9073e-24	2.25995e-22
TK2	7084	995.491	0.710691	0.0916823	7.75167	9.06918e-15	1.31344e-13
INCENP	3619	2554.78	0.710126	0.0661825	10.7298	7.37419e-27	2.5943e-25
PCYT2	5833	1372.89	0.708142	0.0643318	11.0077	3.51039e-28	1.34009e-26
TRIM6	117854	242.739	0.707245	0.12062	5.8634	4.53482e-09	3.618e-08
LRBA	987	1504.2	0.706669	0.0661544	10.6821	1.23429e-26	4.27712e-25
OMA1	115209	218.865	0.705909	0.130489	5.40972	6.31239e-08	4.28648e-07
SVIL	6840	1735.3	0.704514	0.079269	8.88764	6.242e-19	1.29892e-17
BMPER	168667	1916.7	0.703596	0.0582697	12.0748	1.4349e-33	7.26359e-32
PNPO	55163	1557.13	0.702	0.0686147	10.231	1.43969e-24	4.37818e-23
KAT2B	8850	1056.26	0.701257	0.0692352	10.1286	4.12444e-24	1.20437e-22
LMNB1	4001	2956	0.699705	0.0716201	9.76968	1.51936e-22	3.98936e-21
C11orf1	64776	168.125	0.698967	0.138778	5.0366	4.73882e-07	2.85959e-06
RBM43	375287	528.447	0.697668	0.115224	6.05487	1.40534e-09	1.2039e-08
PRSS23	11098	6986.32	0.696866	0.0649229	10.7337	7.06775e-27	2.49192e-25
KIF11	3832	3741.42	0.695631	0.0718569	9.68078	3.63938e-22	9.29885e-21
ITGBL1	9358	3227.89	0.693911	0.056481	12.2857	1.08051e-34	5.70196e-33
SLC16A7	9194	2086.66	0.691984	0.0706976	9.78794	1.26854e-22	3.34713e-21
RRM2B	50484	3407.86	0.691292	0.0618901	11.1697	5.74015e-29	2.30005e-27
PEG10	23089	2774.08	0.690348	0.0629503	10.9665	5.53442e-28	2.08321e-26
SYNE3	161176	950.905	0.689414	0.0765462	9.00651	2.12713e-19	4.61059e-18
PSD3	23362	2438.83	0.686665	0.0575582	11.9299	8.26566e-33	4.0203e-31
LIX1L	128077	4440.02	0.686258	0.0723781	9.48157	2.50491e-21	6.11015e-20
FGGY	55277	316.808	0.685768	0.111587	6.14561	7.9655e-10	7.0713e-09
TMEFF2	23671	169.156	0.685372	0.143282	4.78339	1.72363e-06	9.53846e-06
STAU2	27067	627.524	0.68534	0.0859726	7.97161	1.56627e-15	2.44604e-14
CDK1	983	3046.43	0.684329	0.069413	9.8588	6.27968e-23	1.69572e-21
BCKDHB	594	661.484	0.682394	0.0844941	8.07623	6.67994e-16	1.06906e-14
BORA	79866	642.456	0.681606	0.0898831	7.58325	3.37003e-14	4.63932e-13
MID1	4281	1103.37	0.681218	0.067125	10.1485	3.36476e-24	9.915e-23
PARP10	84875	1438.78	0.681153	0.0979518	6.95396	3.55184e-12	4.09095e-11
ACOX2	8309	218.198	0.681055	0.132053	5.15744	2.50355e-07	1.57366e-06
LSS	4047	7454.98	0.680668	0.0488884	13.9229	4.59891e-44	3.60501e-42
MCCC1	56922	1118.91	0.680324	0.0763508	8.91051	5.07991e-19	1.0681e-17
NEK2	4751	852.361	0.679956	0.108335	6.27643	3.46441e-10	3.22998e-09
KRTAP2-3	730755	96.4499	0.678933	0.214975	3.1582	0.00158748	0.00485781
PNMAL1	55228	523.662	0.678763	0.0991581	6.84526	7.63349e-12	8.48936e-11
B4GAT1	11041	619.847	0.678339	0.0835062	8.12321	4.54001e-16	7.41275e-15
FIG4	9896	585.714	0.678258	0.0863812	7.85192	4.09718e-15	6.11472e-14
GHR	2690	741.605	0.677789	0.0949926	7.13518	9.66609e-13	1.17891e-11
TMEM255B	348013	332.807	0.677259	0.111498	6.07416	1.24635e-09	1.07799e-08
CTSO	1519	474.748	0.675853	0.0970956	6.9607	3.38583e-12	3.9109e-11
FBLN1	2192	30643.7	0.675169	0.0532926	12.6691	8.7726e-37	5.05928e-35
BDH1	622	381.164	0.674532	0.104821	6.4351	1.23394e-10	1.2135e-09
CMBL	134147	1235.24	0.673747	0.0877732	7.676	1.64138e-14	2.32909e-13
DPYD	1806	2196.25	0.673382	0.0682025	9.87327	5.43612e-23	1.47286e-21
SEMA3A	10371	2914.44	0.673284	0.0537764	12.5201	5.79879e-36	3.185e-34
TM7SF3	51768	2153.95	0.672485	0.0547657	12.2793	1.16997e-34	6.13398e-33
RFX5	5993	1216.68	0.67212	0.076809	8.75053	2.12355e-18	4.24395e-17
RGS2	5997	625.232	0.671039	0.0852012	7.87594	3.38197e-15	5.11827e-14
TMEM35	59353	151.711	0.670428	0.163898	4.09052	4.30401e-05	0.000187284
C9orf116	138162	90.554	0.66934	0.187027	3.57885	0.000345114	0.00123952
NEGR1	257194	983.025	0.669206	0.0774191	8.64395	5.4303e-18	1.05649e-16
POU2F2	5452	884.578	0.668918	0.0972064	6.88142	5.92603e-12	6.68251e-11
SECTM1	6398	1064.27	0.668706	0.0700711	9.54325	1.38422e-21	3.40219e-20
PARP14	54625	3289.45	0.667826	0.151402	4.41095	1.0292e-05	4.99083e-05
HINT2	84681	324.302	0.667384	0.116851	5.71143	1.12032e-08	8.50541e-08
NHLRC3	387921	253.354	0.666455	0.125743	5.30015	1.15708e-07	7.57687e-07
ASAH1	427	2431.1	0.666211	0.068514	9.72371	2.38914e-22	6.16292e-21
HEG1	57493	4606.85	0.665262	0.0612684	10.8582	1.8239e-27	6.70897e-26
CENPA	1058	566.576	0.665246	0.103393	6.43417	1.24153e-10	1.22022e-09
LDOC1	23641	556.805	0.663727	0.0857439	7.74081	9.8789e-15	1.42815e-13
MVP	9961	11054.2	0.662275	0.0563891	11.7447	7.51561e-32	3.53825e-30
TIMP4	7079	297.866	0.661816	0.12033	5.50003	3.79733e-08	2.67653e-07
EXOC4	60412	2266.91	0.66143	0.0641245	10.3148	6.04231e-25	1.89645e-23
TENM3	55714	1382.54	0.661045	0.0901176	7.33536	2.21128e-13	2.86579e-12
HERC6	55008	2249.34	0.66048	0.0904481	7.30231	2.8287e-13	3.62523e-12
PAMR1	25891	3909.21	0.660468	0.0576087	11.4647	1.98396e-30	8.68211e-29
CCDC115	84317	559.462	0.659881	0.0855472	7.71365	1.22269e-14	1.75191e-13
EPB41	2035	543.984	0.659271	0.0948013	6.95424	3.5448e-12	4.08575e-11
NUSAP1	51203	2502.36	0.658695	0.0784254	8.399	4.50295e-17	8.05244e-16
SLC22A18	5002	187.028	0.656949	0.147683	4.44838	8.65201e-06	4.26343e-05
THBS2	7058	11562	0.655553	0.0587254	11.163	6.18526e-29	2.46616e-27
BTN3A2	11118	1209.69	0.652426	0.0732772	8.90353	5.40988e-19	1.13159e-17
NUDT16	131870	2516.69	0.65221	0.0558525	11.6774	1.66368e-31	7.67573e-30
STXBP4	252983	489.371	0.651662	0.0936216	6.96059	3.3884e-12	3.91107e-11
ECT2	1894	4219.79	0.651198	0.0670261	9.71559	2.58757e-22	6.6535e-21
MAPK8IP1	9479	298.597	0.649626	0.121441	5.3493	8.82959e-08	5.87233e-07
CKAP2L	150468	2019.73	0.649447	0.071857	9.03805	1.59489e-19	3.49447e-18
ARPIN	348110	1362.16	0.649064	0.0636791	10.1927	2.13704e-24	6.42623e-23
MXD4	10608	2072.6	0.648613	0.0818976	7.9198	2.3789e-15	3.64811e-14
AHNAK2	113146	9569.48	0.647568	0.216235	2.99475	0.00274673	0.0079445
BTN3A1	11119	576.02	0.646525	0.0959552	6.73778	1.60821e-11	1.72439e-10
CCNB1	891	6146.34	0.642427	0.137149	4.68416	2.81104e-06	1.50456e-05
CRYZ	1429	1752	0.642199	0.0628198	10.2229	1.56645e-24	4.7547e-23
MXD3	83463	179.642	0.64171	0.140636	4.56291	5.04496e-06	2.59198e-05
SLC9A7	84679	3811.55	0.640909	0.050808	12.6143	1.76043e-36	1.00097e-34
MX1	4599	8935.02	0.640757	0.198028	3.23569	0.00121351	0.00383254
MSX2	4488	193.228	0.640518	0.135255	4.73563	2.18381e-06	1.18774e-05
ERVMER34-1	100288413	229.41	0.640315	0.136207	4.70105	2.58822e-06	1.39408e-05
PARP4	143	7782.9	0.640051	0.0491903	13.0117	1.04938e-38	6.54261e-37
TUBA1A	7846	9378.37	0.638627	0.0788674	8.09748	5.61109e-16	9.11548e-15
RNF213	57674	9458.63	0.637926	0.0811595	7.86014	3.83693e-15	5.7529e-14
TPX2	22974	8629.01	0.637882	0.0755379	8.44453	3.05282e-17	5.53276e-16
DTX3L	151636	3995.99	0.634874	0.0907497	6.99588	2.63596e-12	3.09117e-11
CPS1	1373	716.531	0.63457	0.0918865	6.90602	4.98449e-12	5.66429e-11
WIF1	11197	345.289	0.634026	0.106796	5.93681	2.9063e-09	2.39423e-08
SMIM10	644538	388.966	0.63397	0.101074	6.27233	3.55688e-10	3.31237e-09
LPCAT3	10162	1595.36	0.633031	0.0671406	9.42844	4.1624e-21	1.0032e-19
PLK1	5347	4883.13	0.632131	0.140423	4.50161	6.74399e-06	3.39208e-05
GPD2	2820	4825.75	0.630825	0.050825	12.4117	2.25751e-35	1.2233e-33
COPG2	26958	1198.48	0.630649	0.068364	9.22487	2.83895e-20	6.49339e-19
PMVK	10654	843.605	0.630438	0.0727526	8.6655	4.49532e-18	8.78818e-17
PCBD2	84105	206.052	0.62975	0.128075	4.91703	8.78671e-07	5.06019e-06
C4orf33	132321	360.338	0.629113	0.105593	5.95792	2.55464e-09	2.11876e-08
TRIOBP	11078	4870.07	0.628985	0.055431	11.3472	7.6599e-30	3.22956e-28
DHTKD1	55526	1016.3	0.626435	0.0801253	7.81819	5.35871e-15	7.93149e-14
SNN	8303	445.692	0.626082	0.0931249	6.72303	1.77986e-11	1.89755e-10
SLIT3	6586	935.847	0.625219	0.0767008	8.15139	3.59756e-16	5.9098e-15
SYNGR1	9145	110.69	0.625095	0.16709	3.74106	0.000183248	0.000697406
ANLN	54443	12813.5	0.624805	0.0672885	9.28546	1.61014e-20	3.71967e-19
CD82	3732	734.089	0.623909	0.0775677	8.04342	8.73644e-16	1.38445e-14
TSPAN14	81619	1772.6	0.622785	0.0640384	9.72517	2.35511e-22	6.08484e-21
GUCY1B3	2983	265.843	0.622688	0.117746	5.28842	1.23381e-07	8.04664e-07
DEPDC1	55635	3172.44	0.622429	0.0644665	9.65507	4.67837e-22	1.18226e-20
FAM171B	165215	703.724	0.622167	0.0882336	7.05136	1.77174e-12	2.11298e-11
MSRB1	51734	508.612	0.621994	0.0960262	6.47734	9.33541e-11	9.27111e-10
TWIST1	7291	2787.17	0.621305	0.0557813	11.1382	8.17307e-29	3.23477e-27
LMO4	8543	1948.14	0.620657	0.061214	10.1391	3.70376e-24	1.08742e-22
MFAP4	4239	586.534	0.620576	0.0883219	7.0263	2.12084e-12	2.50713e-11
SDSL	113675	144.115	0.619968	0.149985	4.13352	3.57242e-05	0.000158091
THBS3	7059	768.124	0.619483	0.0843993	7.33991	2.13738e-13	2.77224e-12
MAGEF1	64110	624.815	0.618724	0.0865076	7.15225	8.53677e-13	1.0483e-11
TCF4	6925	2684.91	0.61821	0.0665009	9.29626	1.45466e-20	3.37984e-19
HS2ST1	9653	4531.2	0.617976	0.0839016	7.36549	1.76502e-13	2.31532e-12
OBFC1	79991	841.94	0.617216	0.0900483	6.85428	7.1672e-12	7.99281e-11
IRAK1BP1	134728	232.909	0.61562	0.124807	4.93259	8.11447e-07	4.69987e-06
BNC2	54796	1177.14	0.61528	0.0740665	8.30713	9.80445e-17	1.6951e-15
CDH13	1012	2938.38	0.614843	0.0794817	7.73566	1.02869e-14	1.48183e-13
LIPE	3991	200.124	0.614631	0.141949	4.32995	1.49141e-05	7.03573e-05
DHRS1	115817	392.862	0.612607	0.101034	6.06336	1.33309e-09	1.14565e-08
CMTM8	152189	84.4379	0.611223	0.184333	3.31585	0.000913638	0.00297268
SEC11C	90701	639.828	0.611171	0.086157	7.09368	1.30588e-12	1.57368e-11
PPAP2B	8613	2836.55	0.609293	0.0562046	10.8406	2.20969e-27	8.05464e-26
FAM210B	116151	1880.78	0.609133	0.0582687	10.4539	1.40665e-25	4.57956e-24
NDN	4692	930.944	0.609029	0.0845462	7.20351	5.86803e-13	7.30023e-12
DGCR6	8214	49.4035	0.60752	0.22152	2.74251	0.00609712	0.016151
SLC30A1	7779	666.302	0.606975	0.0883464	6.8704	6.40222e-12	7.18599e-11
CDCA3	83461	1372.14	0.605776	0.0817823	7.40717	1.29022e-13	1.69939e-12
TNFSF12	8742	242.04	0.605464	0.119079	5.08456	3.68478e-07	2.25985e-06
TRIM35	23087	1840.77	0.604427	0.0596592	10.1313	4.01139e-24	1.17348e-22
PLEKHG4	25894	1670.96	0.604335	0.0605889	9.97436	1.97371e-23	5.50457e-22
L2HGDH	79944	499.742	0.601765	0.0968464	6.21361	5.17814e-10	4.7241e-09
MAPKAPK3	7867	7343.82	0.599132	0.04922	12.1725	4.35323e-34	2.24588e-32
SLC39A11	201266	503.248	0.598804	0.0991672	6.03833	1.55718e-09	1.32483e-08
CCDC109B	55013	470.594	0.598549	0.0973412	6.14898	7.79816e-10	6.938e-09
SLC35E3	55508	535.704	0.598202	0.093908	6.37009	1.8892e-10	1.81696e-09
TLR4	7099	568.588	0.59815	0.100154	5.97229	2.33945e-09	1.9493e-08
TRIM2	23321	1896.01	0.596795	0.099682	5.98699	2.13757e-09	1.79125e-08
FDXR	2232	1233.78	0.596402	0.0679443	8.7778	1.66699e-18	3.37749e-17
DDX60	55601	4815.89	0.595973	0.0755076	7.89288	2.95283e-15	4.49833e-14
TAP1	6890	2550.26	0.595837	0.0717111	8.30885	9.66331e-17	1.67249e-15
OLFM1	10439	356.296	0.594862	0.109404	5.43728	5.40987e-08	3.71739e-07
CD83	9308	254.672	0.592648	0.119591	4.95564	7.20943e-07	4.22263e-06
WNT16	51384	336.906	0.59243	0.105664	5.60671	2.06207e-08	1.49655e-07
CFAP126	257177	187.341	0.590455	0.133147	4.43462	9.2234e-06	4.52146e-05
UNC13B	10497	2153.12	0.589404	0.0616879	9.55462	1.24042e-21	3.05806e-20
PTN	5764	117.069	0.589281	0.166224	3.5451	0.000392458	0.00138978
RNLS	55328	256.737	0.589231	0.117959	4.99522	5.87702e-07	3.48776e-06
SQRDL	58472	6159.69	0.589058	0.0617446	9.54022	1.42527e-21	3.49246e-20
NCAPD2	9918	7378.31	0.587778	0.0697016	8.43277	3.37571e-17	6.1111e-16
ECHDC2	55268	375.517	0.587198	0.105219	5.58074	2.39495e-08	1.72496e-07
SLC38A1	81539	7563.92	0.587187	0.0604234	9.71787	2.53026e-22	6.51653e-21
EVC	2121	7596.66	0.586738	0.0685493	8.55936	1.135e-17	2.14112e-16
NCR3LG1	374383	1791.24	0.58585	0.0674886	8.68073	3.93254e-18	7.71599e-17
PCBD1	5092	903.833	0.585748	0.0734908	7.97036	1.58214e-15	2.46607e-14
KIF15	56992	1064.56	0.585626	0.0816418	7.17311	7.3311e-13	9.07147e-12
NUF2	83540	1228.1	0.585376	0.0853902	6.85531	7.11584e-12	7.94651e-11
PLAC9	219348	252.413	0.584405	0.118383	4.93656	7.95138e-07	4.61535e-06
XKR8	55113	1136.51	0.584248	0.0755231	7.73601	1.02583e-14	1.47902e-13
BRE	9577	886.308	0.584153	0.0725654	8.05002	8.27789e-16	1.31437e-14
FJX1	24147	2420.58	0.584048	0.0676523	8.63308	5.9719e-18	1.15767e-16
PNPLA4	8228	194.573	0.583991	0.146799	3.97816	6.94511e-05	0.000288377
ACSS1	84532	442.262	0.583802	0.103868	5.62061	1.90284e-08	1.38828e-07
RFTN2	130132	218.165	0.583619	0.158581	3.68025	0.000233004	0.000866747
ATP8B1	5205	3101.79	0.580799	0.0526206	11.0375	2.52014e-28	9.68936e-27
TMOD2	29767	1675.03	0.580523	0.0924199	6.28136	3.35613e-10	3.13265e-09
COL4A5	1287	1565.71	0.579518	0.0685961	8.44828	2.95638e-17	5.37004e-16
ZFP36L2	678	10334.9	0.579476	0.0503874	11.5004	1.31292e-30	5.82445e-29
STS	412	2288.99	0.578308	0.0671458	8.61272	7.13455e-18	1.37645e-16
CHST11	50515	1500.03	0.577511	0.0647835	8.91448	4.90102e-19	1.03318e-17
C14orf159	80017	1109.32	0.577396	0.0843979	6.84136	7.8444e-12	8.69996e-11
ALAD	210	1336.41	0.577324	0.0766878	7.52823	5.14322e-14	6.97336e-13
BUB1	699	3380.92	0.577187	0.0718641	8.03165	9.61725e-16	1.51069e-14
CCDC15	80071	386.936	0.576946	0.107443	5.36978	7.88327e-08	5.27774e-07
FOCAD	54914	2813.8	0.576651	0.0581676	9.91361	3.63268e-23	9.90886e-22
SELENBP1	8991	527.568	0.576642	0.0929803	6.20177	5.58324e-10	5.07362e-09
SVEP1	79987	1116.63	0.576128	0.0663803	8.67921	3.98528e-18	7.80998e-17
IQSEC2	23096	640.788	0.576122	0.0845227	6.81618	9.34938e-12	1.02913e-10
CPED1	79974	2229.61	0.57539	0.0550522	10.4517	1.43907e-25	4.65693e-24
S100A6	6277	37994.5	0.57533	0.0517554	11.1163	1.04469e-28	4.1246e-27
IGFBP6	3489	5749.91	0.574063	0.0518467	11.0723	1.70929e-28	6.65099e-27
GTSE1	51512	2482.26	0.57353	0.082487	6.95298	3.57654e-12	4.11646e-11
MME	4311	32639.4	0.571558	0.0576407	9.91588	3.55129e-23	9.71877e-22
PDCD4	27250	1354.68	0.570508	0.174667	3.26627	0.00108974	0.00348389
SPATA6	54558	244.111	0.569575	0.138545	4.11112	3.93744e-05	0.000172542
OXCT1	5019	3340.2	0.56893	0.0544847	10.442	1.59395e-25	5.14784e-24
DDX58	23586	2983.29	0.568255	0.0847241	6.70712	1.98499e-11	2.1005e-10
TRIM59	286827	1119.21	0.567853	0.079263	7.16416	7.82675e-13	9.67736e-12
DYNC2H1	79659	2102.68	0.567709	0.0788132	7.20322	5.88074e-13	7.31041e-12
RMDN1	51115	2371.7	0.566331	0.057769	9.80338	1.08881e-22	2.88703e-21
EDNRA	1909	856.649	0.565944	0.0843532	6.70922	1.95673e-11	2.07331e-10
HINT3	135114	721.722	0.565435	0.0829277	6.81841	9.20536e-12	1.01397e-10
PRKG1	5592	540.08	0.565292	0.103922	5.43959	5.34024e-08	3.67423e-07
AHCYL2	23382	533.312	0.564563	0.0946272	5.96618	2.42873e-09	2.01848e-08
RACGAP1	29127	4148.39	0.564527	0.0694272	8.13121	4.25038e-16	6.94688e-15
IQGAP3	128239	2909.47	0.563791	0.0745822	7.55933	4.05159e-14	5.5398e-13
WDR7	23335	1199.46	0.563726	0.0715249	7.88153	3.23384e-15	4.9079e-14
MMAB	326625	748.177	0.563719	0.0877795	6.422	1.345e-10	1.31153e-09
EBF1	1879	447.011	0.5631	0.109612	5.13722	2.78835e-07	1.74453e-06
FAM72B	653820	166.228	0.562394	0.149201	3.76937	0.000163662	0.000629843
CNNM2	54805	287.367	0.562175	0.123451	4.55383	5.26777e-06	2.7013e-05
SCRN3	79634	800.353	0.561635	0.0784617	7.15808	8.18174e-13	1.00777e-11
SVIP	258010	134.831	0.561452	0.158515	3.54195	0.000397177	0.00140557
DPYSL3	1809	5310.02	0.560633	0.050817	11.0324	2.66666e-28	1.02283e-26
NDP	4693	250.945	0.560275	0.122579	4.57071	4.86067e-06	2.50687e-05
PGF	5228	389.572	0.560261	0.103551	5.41051	6.28462e-08	4.26942e-07
LTA4H	4048	2161.73	0.559742	0.0565675	9.89512	4.37069e-23	1.19018e-21
DOCK11	139818	1547.08	0.559176	0.0779032	7.17782	7.08299e-13	8.77791e-12
PCOLCE	5118	12873.1	0.558097	0.0537091	10.3911	2.72219e-25	8.6702e-24
WARS	7453	7213.8	0.557395	0.0497117	11.2126	3.53824e-29	1.43557e-27
NBPF1	55672	1030.18	0.556966	0.0696019	8.00216	1.22251e-15	1.91475e-14
SESN1	27244	868.488	0.556097	0.086713	6.41307	1.42615e-10	1.38565e-09
KIF4A	24137	1965.77	0.555997	0.0729142	7.62536	2.43356e-14	3.39354e-13
CDS2	8760	2097.72	0.555988	0.0565971	9.82363	8.9079e-23	2.38549e-21
C22orf46	79640	413.531	0.555398	0.102568	5.41492	6.13168e-08	4.17606e-07
CDKN1A	1026	19565.8	0.555349	0.0797201	6.96623	3.25542e-12	3.76565e-11
NCAPG	64151	3669.74	0.55502	0.0614447	9.03283	1.67285e-19	3.65043e-18
SPTBN1	6711	10826.1	0.555017	0.0512381	10.8321	2.42483e-27	8.79914e-26
PCBP3	54039	451.828	0.554007	0.0984699	5.62616	1.84264e-08	1.3476e-07
ACACA	31	5570.8	0.553698	0.0489011	11.3228	1.0117e-29	4.22144e-28
CAMK2G	818	1264.58	0.553425	0.0665415	8.317	9.02206e-17	1.56654e-15
CCDC25	55246	2076.58	0.553143	0.0591484	9.35177	8.61905e-21	2.02004e-19
DMC1	11144	171.282	0.551471	0.140534	3.9241	8.7053e-05	0.000354267
SRD5A3	79644	766.993	0.551404	0.0952276	5.79038	7.02261e-09	5.47303e-08
TPMT	7172	1495.24	0.551266	0.0667865	8.25416	1.52973e-16	2.60846e-15
PRKCDBP	112464	1514.92	0.55005	0.0673868	8.16259	3.27918e-16	5.39777e-15
SRSF8	10929	1150.72	0.549775	0.0728123	7.55058	4.33322e-14	5.90987e-13
UBXN2B	137886	699.151	0.548565	0.080747	6.79362	1.09354e-11	1.19314e-10
THEM4	117145	657.737	0.548451	0.0852791	6.43125	1.26562e-10	1.24163e-09
KCNIP3	30818	1291.53	0.54799	0.0697413	7.85748	3.91944e-15	5.87117e-14
NFIX	4784	4240.16	0.547738	0.0504969	10.847	2.06132e-27	7.53082e-26
TMEM53	79639	189.761	0.547528	0.146256	3.74363	0.000181379	0.000690617
STAMBPL1	57559	1305.52	0.547464	0.0738635	7.41184	1.24561e-13	1.64466e-12
STMN1	3925	7239.63	0.547028	0.0582342	9.3936	5.79849e-21	1.37697e-19
DYNC1H1	1778	36533.3	0.545346	0.0676555	8.06064	7.58976e-16	1.21106e-14
NDC1	55706	4027.08	0.545178	0.0713495	7.64095	2.15633e-14	3.03049e-13
NDE1	54820	1053.5	0.543716	0.0742343	7.32432	2.40115e-13	3.10439e-12
TYMS	7298	2262.26	0.543663	0.0748799	7.26046	3.85766e-13	4.85909e-12
TRAPPC2L	51693	1299.47	0.543484	0.0690463	7.87129	3.50991e-15	5.28713e-14
IFI16	3428	9520.95	0.543114	0.0593903	9.14483	5.97213e-20	1.33942e-18
CYP2R1	120227	189.846	0.542993	0.134696	4.03124	5.54829e-05	0.000235587
LDLR	3949	8037.57	0.542783	0.0551024	9.85044	6.8243e-23	1.83665e-21
KIF2C	11004	2737.37	0.542732	0.0863788	6.28316	3.31749e-10	3.10016e-09
MAOA	4128	2154.33	0.54058	0.0587797	9.19671	3.69066e-20	8.38212e-19
CUEDC1	404093	1279.15	0.540498	0.0666675	8.10737	5.17282e-16	8.41195e-15
VCAN	1462	4563.14	0.540334	0.0611302	8.83908	9.65097e-19	1.99034e-17
LYNX1	66004	612.003	0.539615	0.105779	5.10133	3.37284e-07	2.08039e-06
GATB	5188	1171.38	0.538813	0.0686318	7.85077	4.13476e-15	6.1651e-14
MMP16	4325	738.662	0.538109	0.078956	6.8153	9.40652e-12	1.03472e-10
POGLUT1	56983	921.29	0.538019	0.0754082	7.13475	9.69636e-13	1.18171e-11
TLN2	83660	2195.79	0.536888	0.057139	9.39617	5.65835e-21	1.34567e-19
TMEM19	55266	1078.8	0.53588	0.0762438	7.02851	2.08753e-12	2.46955e-11
RAD51C	5889	586.629	0.535638	0.0846382	6.32856	2.47462e-10	2.34783e-09
FAM63B	54629	2335.68	0.535328	0.0675776	7.92168	2.3432e-15	3.60019e-14
NAGPA	51172	581.227	0.535271	0.0866448	6.17776	6.50169e-10	5.84899e-09
SERGEF	26297	270.65	0.534748	0.125456	4.26243	2.02212e-05	9.34017e-05
DIS3L	115752	1296.08	0.534682	0.06731	7.94357	1.9644e-15	3.03843e-14
ERAP1	51752	1379.53	0.533223	0.0683749	7.79852	6.26392e-15	9.22058e-14
APOBEC3C	27350	1641.37	0.533156	0.0604388	8.82142	1.13016e-18	2.31052e-17
OSBPL3	26031	3021.27	0.53302	0.0510985	10.4312	1.78573e-25	5.7557e-24
TMEM135	65084	1019.14	0.532764	0.0750592	7.09792	1.26651e-12	1.52967e-11
SLC1A4	6509	312.185	0.532293	0.124645	4.27047	1.95063e-05	9.02286e-05
CDC14B	8555	1303.52	0.531193	0.072983	7.27832	3.3801e-13	4.28429e-12
SLC25A12	8604	1506.37	0.53038	0.0606294	8.74789	2.17373e-18	4.33351e-17
SAPCD2	89958	510.794	0.529818	0.116439	4.55018	5.35999e-06	2.74423e-05
MYO18A	399687	2086.35	0.52931	0.0631265	8.38492	5.07624e-17	9.05759e-16
MPC1	51660	638.72	0.529145	0.0838969	6.30709	2.84323e-10	2.67399e-09
PRIMPOL	201973	577.158	0.529006	0.0931068	5.68172	1.33348e-08	9.97826e-08
CCNF	899	1609.52	0.528864	0.0887584	5.95847	2.54614e-09	2.11388e-08
SH3D19	152503	3874.14	0.528472	0.0569675	9.27673	1.74755e-20	4.0256e-19
CASC5	57082	2408.85	0.527827	0.0756776	6.97468	3.06558e-12	3.56392e-11
SRGN	5552	1684.58	0.527607	0.0811582	6.50097	7.9806e-11	7.94517e-10
SAP30L	79685	672.81	0.527557	0.0985841	5.35134	8.73061e-08	5.8089e-07
HIBCH	26275	626.74	0.5275	0.0820871	6.42609	1.30925e-10	1.28054e-09
GLI3	2737	1284.33	0.527423	0.0695274	7.58584	3.30337e-14	4.55143e-13
ARRB1	408	849.382	0.52678	0.0865849	6.08397	1.17243e-09	1.01733e-08
F8	2157	200.006	0.525884	0.144064	3.65035	0.000261884	0.000965942
SGOL2	151246	2797.42	0.525843	0.0576165	9.12661	7.06793e-20	1.57208e-18
BBS9	27241	507.921	0.525486	0.105833	4.96524	6.86165e-07	4.02769e-06
MSI2	124540	986.524	0.524143	0.0810439	6.4674	9.97052e-11	9.86544e-10
CDCA2	157313	1882.38	0.523285	0.0863729	6.05844	1.37447e-09	1.18059e-08
SLC35A5	55032	971.172	0.523203	0.0719567	7.27108	3.56628e-13	4.5026e-12
TTYH3	80727	7651.83	0.522023	0.059663	8.74953	2.14237e-18	4.27627e-17
IDNK	414328	108.702	0.521998	0.172739	3.02189	0.002512	0.00733125
CTSA	5476	6982.88	0.521844	0.0431362	12.0976	1.08762e-33	5.5229e-32
CPNE8	144402	928.011	0.520465	0.0922161	5.64397	1.66172e-08	1.22471e-07
AIG1	51390	841.988	0.519381	0.0809369	6.41712	1.38879e-10	1.35178e-09
PAFAH1B3	5050	273.458	0.518698	0.114048	4.54807	5.41405e-06	2.7684e-05
SH3RF3	344558	913.593	0.518472	0.0811063	6.3925	1.63192e-10	1.57515e-09
LRIG3	121227	565.787	0.517831	0.0909965	5.69067	1.26539e-08	9.50399e-08
PARP12	64761	1184.77	0.515281	0.0875905	5.88285	4.03271e-09	3.24304e-08
TBC1D5	9779	3550.88	0.514943	0.0602577	8.54567	1.27789e-17	2.39667e-16
HYLS1	219844	593.583	0.514388	0.0857692	5.99735	2.00566e-09	1.68684e-08
ETV5	2119	2151.73	0.513045	0.0625831	8.19783	2.44771e-16	4.07061e-15
LIFR	3977	1338.15	0.51205	0.0767024	6.67581	2.45876e-11	2.58322e-10
CASP6	839	410.353	0.511397	0.0966336	5.29212	1.20903e-07	7.89465e-07
STAT1	6772	18164.8	0.511089	0.0799384	6.39353	1.62094e-10	1.56642e-09
FDXACB1	91893	229.629	0.510702	0.124156	4.11339	3.89898e-05	0.000170991
CDCA8	55143	2587.91	0.510638	0.161333	3.16512	0.0015502	0.00475364
CMSS1	84319	942.882	0.50997	0.0723471	7.04893	1.80298e-12	2.14709e-11
PCDHGB5	56101	272.495	0.509373	0.125076	4.0725	4.65107e-05	0.000200924
IFT88	8100	584.46	0.508719	0.0846406	6.01034	1.85135e-09	1.5644e-08
MAST4	375449	903.503	0.508329	0.100453	5.06035	4.18497e-07	2.5463e-06
IFIT3	3437	8044.42	0.508266	0.0793435	6.40589	1.49494e-10	1.44726e-09
BCR	613	1860.4	0.508197	0.0560148	9.07256	1.16257e-19	2.55766e-18
DBI	1622	4901.94	0.508013	0.0600516	8.45961	2.68267e-17	4.88936e-16
CYB5D2	124936	256.202	0.506603	0.122996	4.11884	3.80785e-05	0.000167363
NEFM	4741	285.469	0.506429	0.123724	4.09321	4.25434e-05	0.000185373
ANXA4	307	3327.49	0.506226	0.0566844	8.9306	4.23698e-19	9.00247e-18
KIF20B	9585	3333.54	0.506077	0.0664536	7.61549	2.62684e-14	3.65045e-13
TRAF3IP2	10758	1953.47	0.506042	0.0591876	8.54979	1.23308e-17	2.32072e-16
KLF12	11278	1462.42	0.505553	0.074946	6.74556	1.52433e-11	1.6399e-10
GTF2H5	404672	781.799	0.504408	0.0775623	6.50326	7.85999e-11	7.82993e-10
FAM217B	63939	645.553	0.503721	0.0898991	5.60318	2.10451e-08	1.52598e-07
EIF3C	8663	255.221	0.503688	0.139041	3.62259	0.000291664	0.00106412
PIF1	80119	451.228	0.503616	0.0976136	5.15928	2.47904e-07	1.55947e-06
GSTA4	2941	550.229	0.503495	0.0904521	5.56643	2.60012e-08	1.86359e-07
TBCK	93627	783.206	0.50342	0.0792891	6.34917	2.16484e-10	2.06485e-09
NUBPL	80224	680.27	0.503324	0.0791852	6.35629	2.06687e-10	1.97607e-09
GSTK1	373156	3396.96	0.503119	0.058648	8.57861	9.60225e-18	1.83066e-16
ABHD15	116236	511.078	0.502093	0.109272	4.5949	4.32963e-06	2.24806e-05
METTL25	84190	198.288	0.502038	0.128668	3.9018	9.54796e-05	0.000385259
STRIP2	57464	1091.1	0.501765	0.0742154	6.76093	1.37105e-11	1.48489e-10
CASP10	843	409.351	0.501294	0.111829	4.4827	7.37036e-06	3.67675e-05
MAPK11	5600	347.686	0.500479	0.12033	4.15921	3.19346e-05	0.000142492
RNF20	56254	2115.21	0.500384	0.0541721	9.23693	2.5367e-20	5.82683e-19
C10orf32	119032	543.611	0.499637	0.0969563	5.15322	2.56051e-07	1.60759e-06
ADGRA2	25960	3204.44	0.49958	0.0644056	7.75679	8.71077e-15	1.26494e-13
C17orf58	284018	227.037	0.499486	0.138926	3.59534	0.000323969	0.00117008
TMEM245	23731	1915.26	0.499324	0.0592319	8.42997	3.4575e-17	6.25216e-16
PBXIP1	57326	625.275	0.499137	0.0880105	5.67133	1.41696e-08	1.05588e-07
CCNB2	9133	1775.81	0.498839	0.0918696	5.42986	5.63972e-08	3.86218e-07
ACYP1	97	208.585	0.498583	0.130009	3.83499	0.000125571	0.000494568
CAPN1	823	6905.72	0.497824	0.0490596	10.1473	3.40531e-24	1.00162e-22
COL15A1	1306	1145.93	0.497807	0.0928594	5.36086	8.28252e-08	5.51986e-07
PEX1	5189	593.326	0.497521	0.0854359	5.82333	5.76858e-09	4.54173e-08
ENTPD5	957	958.33	0.495214	0.081758	6.05708	1.38617e-09	1.18937e-08
FAS	355	2577.19	0.4945	0.0580359	8.52058	1.58759e-17	2.94621e-16
SAMD9	54809	4103.14	0.494296	0.0827136	5.976	2.28683e-09	1.9094e-08
LOC102724023	102724023	178.648	0.494183	0.13828	3.57378	0.000351864	0.00126152
FAM13B	51306	1224.03	0.493899	0.0648351	7.61777	2.581e-14	3.58983e-13
EPS8L2	64787	792.449	0.493433	0.0817754	6.03401	1.59945e-09	1.35793e-08
RETSAT	54884	2802.09	0.492804	0.0558626	8.82172	1.12717e-18	2.30983e-17
NBPF3	84224	548.124	0.492732	0.0896579	5.49569	3.89195e-08	2.73249e-07
GPX1	2876	10899.4	0.492492	0.0429182	11.4751	1.75913e-30	7.74019e-29
S100A16	140576	20090	0.492442	0.0384185	12.8178	1.30314e-37	7.765e-36
TMEM97	27346	2150.65	0.491733	0.0590109	8.33292	7.88748e-17	1.37694e-15
ZNF521	25925	499.416	0.491508	0.110705	4.4398	9.0042e-06	4.42214e-05
PDGFRB	5159	8475.89	0.491467	0.0736622	6.67191	2.52499e-11	2.64764e-10
CEP112	201134	295.643	0.491422	0.117562	4.1801	2.9138e-05	0.000131174
MTHFD1	4522	7988.17	0.491391	0.0458975	10.7063	9.5105e-27	3.32415e-25
RGL1	23179	2514.28	0.490872	0.0625799	7.84393	4.36674e-15	6.49899e-14
PRUNE	58497	311.893	0.490858	0.122645	4.00228	6.27358e-05	0.00026368
EVI2A	2123	229.74	0.490797	0.123324	3.97973	6.8994e-05	0.000286773
ARHGEF3	50650	295.901	0.490757	0.110665	4.43461	9.22399e-06	4.52146e-05
AR	367	1522.48	0.490717	0.0692724	7.08388	1.40172e-12	1.68165e-11
HDHD1	8226	2225.36	0.490688	0.0590999	8.30269	1.01783e-16	1.75597e-15
SHMT1	6470	592.081	0.490176	0.0874428	5.60567	2.07446e-08	1.50487e-07
CD248	57124	7635.09	0.489843	0.057887	8.46204	2.6273e-17	4.79386e-16
IFT74	80173	623.79	0.489209	0.0935581	5.22893	1.70493e-07	1.09468e-06
G6PC3	92579	2250.21	0.489207	0.0582766	8.39457	4.67592e-17	8.35251e-16
LIN7A	8825	1263.78	0.489078	0.0845802	5.78242	7.36327e-09	5.7247e-08
TNS3	64759	7297.88	0.489071	0.065952	7.41557	1.21104e-13	1.60163e-12
GAS7	8522	710.334	0.489065	0.0816271	5.99146	2.07969e-09	1.7482e-08
GLUL	2752	35405.6	0.488681	0.0451537	10.8226	2.68986e-27	9.7172e-26
CAV1	857	80713.4	0.488634	0.0489127	9.98993	1.68697e-23	4.71302e-22
LOXL4	84171	433.91	0.488565	0.101921	4.79356	1.63846e-06	9.0889e-06
KREMEN1	83999	2010.61	0.488099	0.0583489	8.36517	6.003e-17	1.05826e-15
C14orf1	11161	1117.28	0.48799	0.0872021	5.59608	2.19259e-08	1.587e-07
ANP32E	81611	3926.29	0.487812	0.0543744	8.97135	2.92897e-19	6.28158e-18
CAPS	828	145.527	0.487466	0.164498	2.96335	0.00304307	0.00868649
SPC25	57405	528.04	0.487457	0.104151	4.68029	2.86467e-06	1.52944e-05
TP53I11	9537	498.488	0.487457	0.102779	4.74279	2.10796e-06	1.15075e-05
DUSP18	150290	376.417	0.486254	0.106434	4.56861	4.90971e-06	2.53055e-05
DAK	26007	643.525	0.485189	0.0884943	5.48272	4.18838e-08	2.92914e-07
DHRS4L2	317749	497.086	0.485056	0.0910455	5.32762	9.95073e-08	6.57093e-07
TTLL1	25809	153.592	0.484573	0.161856	2.99386	0.00275473	0.00796481
RBBP9	10741	1547.83	0.483686	0.0668288	7.23769	4.56406e-13	5.70878e-12
NAPEPLD	222236	454.465	0.48368	0.0941635	5.1366	2.79759e-07	1.74895e-06
AMACR	23600	328.213	0.48341	0.109701	4.40661	1.05001e-05	5.08567e-05
GDF11	10220	1130.42	0.482968	0.0675389	7.15096	8.61702e-13	1.05735e-11
NTPCR	84284	960.977	0.48105	0.0750335	6.41113	1.44441e-10	1.40086e-09
ATP2A3	489	456.111	0.480965	0.0929864	5.17243	2.31071e-07	1.45983e-06
RAD51B	5890	160.371	0.480825	0.145375	3.30747	0.000941419	0.00305262
ZHX3	23051	4375.59	0.480626	0.0587263	8.18416	2.74202e-16	4.55068e-15
MPHOSPH9	10198	1096.07	0.480594	0.0687473	6.99073	2.73455e-12	3.19288e-11
MEIS2	4212	1182.63	0.480528	0.0675284	7.11594	1.11149e-12	1.34747e-11
DYNC2LI1	51626	407.96	0.48051	0.0977222	4.9171	8.78336e-07	5.06007e-06
PGAP2	27315	684.971	0.479777	0.081244	5.90538	3.51838e-09	2.86077e-08
GOLPH3L	55204	996.367	0.479752	0.0745883	6.432	1.25935e-10	1.23623e-09
ITPKA	3706	169.293	0.47916	0.151913	3.15417	0.00160953	0.00491502
CDKN2D	1032	147.088	0.479094	0.150446	3.1845	0.00145005	0.00448588
IPO8	10526	3777.95	0.47886	0.0537232	8.91348	4.94536e-19	1.04117e-17
PAPPA	5069	1687.16	0.478756	0.0900551	5.31626	1.05923e-07	6.97287e-07
TMEM14A	28978	612.888	0.478697	0.0921499	5.19477	2.04976e-07	1.30622e-06
PRDX5	25824	2920.24	0.478428	0.057313	8.34764	6.96409e-17	1.21838e-15
BCL9	607	598.597	0.478304	0.0885265	5.40294	6.55564e-08	4.4386e-07
TTC13	79573	458.484	0.47809	0.0947705	5.04471	4.54202e-07	2.7473e-06
H2AFX	3014	2749.6	0.477864	0.155281	3.0774	0.00208812	0.00621319
OLFML3	56944	1815.86	0.477434	0.086108	5.54459	2.94637e-08	2.10429e-07
FERMT1	55612	1628.82	0.476717	0.0616143	7.73712	1.01695e-14	1.46753e-13
AASS	10157	1336.79	0.476576	0.0686843	6.93864	3.95881e-12	4.54348e-11
SMC2	10592	3604.62	0.475967	0.0535361	8.89058	6.07917e-19	1.26666e-17
THNSL1	79896	456.086	0.475456	0.0974919	4.87687	1.07781e-06	6.11757e-06
KCNK2	3776	714.176	0.475416	0.0832514	5.71061	1.12573e-08	8.54242e-08
PHF14	9678	1050.52	0.475374	0.0728895	6.52183	6.94525e-11	6.953e-10
NUDT8	254552	101.768	0.473944	0.168657	2.81011	0.00495243	0.013414
PRKAR2B	5577	260.408	0.473879	0.127293	3.72273	0.000197078	0.000744077
GNPTAB	79158	2028.37	0.473776	0.056742	8.34965	6.84676e-17	1.19915e-15
ZC4H2	55906	321.471	0.473505	0.115837	4.08768	4.357e-05	0.000189233
CAST	831	11624.6	0.473295	0.0518566	9.127	7.04232e-20	1.56854e-18
OSBP2	23762	904.891	0.47258	0.0803109	5.88439	3.99526e-09	3.21612e-08
ESPL1	9700	1661.32	0.471405	0.0763537	6.17397	6.65978e-10	5.98121e-09
RILPL2	196383	627.417	0.471243	0.0889599	5.29725	1.17559e-07	7.69181e-07
ANXA11	311	6807.94	0.471139	0.0461347	10.2122	1.7477e-24	5.28499e-23
PCDH9	5101	426.899	0.47078	0.0989108	4.75964	1.93941e-06	1.0674e-05
ARHGAP11A	9824	5108.72	0.470652	0.0712538	6.60529	3.96749e-11	4.0781e-10
FRRS1	391059	278.391	0.469501	0.117645	3.99084	6.58409e-05	0.000274799
TBX18	9096	4359.05	0.468854	0.0518872	9.03602	1.62485e-19	3.55049e-18
IFT80	57560	1520.88	0.46874	0.0789559	5.93674	2.90754e-09	2.39423e-08
ADAM9	8754	19716.2	0.468448	0.0554028	8.45531	2.78355e-17	5.0618e-16
PEX11B	8799	1118.57	0.468141	0.0697623	6.71051	1.9395e-11	2.05776e-10
DSEL	92126	3578.92	0.468126	0.0772826	6.05732	1.38407e-09	1.18819e-08
TMEM80	283232	283.882	0.46809	0.123476	3.79094	0.000150077	0.00058312
CEP55	55165	3418.69	0.468035	0.0761788	6.1439	8.05179e-10	7.14398e-09
RIN3	79890	1912.57	0.468024	0.0597065	7.83874	4.55094e-15	6.76068e-14
SAV1	60485	1958.27	0.467631	0.0633768	7.37859	1.59974e-13	2.10363e-12
BUB1B	701	2891.85	0.46701	0.0797033	5.85935	4.64683e-09	3.70311e-08
TRAPPC9	83696	498.244	0.465981	0.0954552	4.88167	1.0519e-06	5.98734e-06
SUMF1	285362	742.349	0.465917	0.0829911	5.61406	1.97639e-08	1.43955e-07
CROT	54677	652.119	0.465875	0.0801905	5.80961	6.26192e-09	4.90861e-08
MIPEP	4285	1223.91	0.465714	0.0683549	6.81318	9.54637e-12	1.04796e-10
PDGFRA	5156	15145	0.465509	0.069591	6.68921	2.24386e-11	2.36513e-10
KIAA0513	9764	367.096	0.465444	0.111159	4.18718	2.82439e-05	0.000127575
TRAF3IP1	26146	679.708	0.465378	0.082953	5.61014	2.02167e-08	1.47053e-07
NAA38	84316	855.75	0.46506	0.074456	6.24611	4.2081e-10	3.87635e-09
EFNB1	1947	1650.19	0.464849	0.0609204	7.63043	2.33976e-14	3.2712e-13
PCDHGA12	26025	1283.64	0.464688	0.0705083	6.59054	4.38227e-11	4.48163e-10
GYPC	2995	1058.7	0.464484	0.0685966	6.77124	1.27686e-11	1.38655e-10
SNX29	92017	1557.49	0.463928	0.068569	6.76586	1.32518e-11	1.43714e-10
ZMYND8	23613	3420.94	0.463281	0.0566646	8.17584	2.93815e-16	4.86119e-15
HEXIM1	10614	1663.39	0.46298	0.0652785	7.09238	1.31825e-12	1.5874e-11
KIAA1143	57456	1462.22	0.461881	0.0654461	7.05743	1.69616e-12	2.02586e-11
MEGF8	1954	2655.54	0.461473	0.0616598	7.48418	7.19948e-14	9.62394e-13
EIF4E3	317649	374.251	0.461291	0.0990962	4.65498	3.2401e-06	1.71601e-05
LBR	3930	2963.57	0.461253	0.0657618	7.01399	2.31608e-12	2.72994e-11
AOX1	316	8604.09	0.460625	0.0462224	9.96541	2.15983e-23	6.00291e-22
PRCP	5547	5358.16	0.460301	0.0521037	8.83432	1.0071e-18	2.07432e-17
PLSCR1	5359	2981.13	0.459406	0.0813698	5.64591	1.64314e-08	1.21212e-07
ALDH2	217	1022.53	0.457349	0.07903	5.78703	7.16407e-09	5.5752e-08
GLRB	2743	282.044	0.45692	0.115196	3.96644	7.2953e-05	0.000301985
TAGLN2	8407	13166.2	0.456767	0.0452779	10.0881	6.23786e-24	1.79233e-22
CORO2B	10391	1958.04	0.456576	0.0598075	7.63409	2.27423e-14	3.18235e-13
LAMB3	3914	619.96	0.456412	0.0835583	5.4622	4.70283e-08	3.26208e-07
EGFLAM	133584	256.966	0.454865	0.124686	3.64809	0.000264196	0.000973361
CABYR	26256	196.263	0.454637	0.135252	3.3614	0.000775493	0.00256454
IL6ST	3572	27800.3	0.454107	0.0494436	9.18435	4.14038e-20	9.36399e-19
MLH1	4292	2011.46	0.451289	0.0578471	7.8014	6.12243e-15	9.02053e-14
PARP1	142	8445.16	0.450774	0.0531055	8.48828	2.09726e-17	3.86605e-16
SARAF	51669	2948.53	0.450571	0.0679818	6.62781	3.40708e-11	3.52676e-10
GLE1	2733	2296.38	0.450208	0.0548031	8.215	2.12169e-16	3.56515e-15
GBA	2629	2831.93	0.450192	0.0548105	8.21361	2.14643e-16	3.60297e-15
CNDP2	55748	4068.95	0.450171	0.0519869	8.65931	4.74628e-18	9.25639e-17
RNF13	11342	1730.33	0.450006	0.0647826	6.9464	3.74715e-12	4.30362e-11
LAP3	51056	4295.31	0.449593	0.0523404	8.58979	8.71269e-18	1.67292e-16
FAM50B	26240	269.154	0.449483	0.118801	3.78351	0.000154634	0.000598809
MTMR4	9110	2522.45	0.448491	0.057004	7.86771	3.61181e-15	5.43049e-14
HOXB8	3218	201.876	0.448036	0.139815	3.20449	0.00135302	0.00421867
STIL	6491	1623.57	0.447549	0.0703345	6.36316	1.9765e-10	1.89641e-09
C1orf198	84886	2085.12	0.447082	0.0657238	6.80244	1.02863e-11	1.12536e-10
FZD2	2535	212.88	0.446742	0.147526	3.02822	0.00246001	0.00720555
SH3BGRL	6451	1853.2	0.445892	0.0718084	6.20946	5.31677e-10	4.8451e-09
SKAP2	8935	2547.38	0.445734	0.0571868	7.79436	6.4736e-15	9.50324e-14
LRCH2	57631	477.116	0.445333	0.0998583	4.45965	8.20942e-06	4.067e-05
ITGA1	3672	1004.83	0.445223	0.0724096	6.14868	7.81323e-10	6.94758e-09
SPATA18	132671	1199.51	0.445073	0.0777051	5.72771	1.01795e-08	7.77201e-08
IRAK4	51135	2003.62	0.444968	0.0607443	7.32526	2.38427e-13	3.08503e-12
ALG1	56052	1349.32	0.444869	0.0688786	6.45874	1.05576e-10	1.04208e-09
DPF3	8110	392.889	0.444685	0.102946	4.31959	1.56316e-05	7.35273e-05
HFE	3077	782.539	0.444583	0.0911071	4.87979	1.062e-06	6.04267e-06
OASL	8638	3007.64	0.444568	0.0744868	5.96842	2.39559e-09	1.993e-08
PSME2	5721	2039.69	0.444033	0.0621578	7.14365	9.08855e-13	1.11183e-11
PSTPIP2	9050	774.564	0.443538	0.0784798	5.65162	1.58947e-08	1.17575e-07
ABCB9	23457	292.246	0.443259	0.111912	3.96079	7.47023e-05	0.0003082
MORN2	729967	367.21	0.442997	0.109043	4.06258	4.85337e-05	0.000208715
LTBP1	4052	35389.7	0.442441	0.0491637	8.99936	2.27044e-19	4.91462e-18
RAB27A	5873	1170.36	0.442232	0.0671347	6.58723	4.48122e-11	4.57992e-10
IMPACT	55364	1577.4	0.44207	0.0682991	6.47256	9.63591e-11	9.56366e-10
TFDP2	7029	933.582	0.441881	0.0824255	5.36098	8.27732e-08	5.51895e-07
ANGEL2	90806	1554.76	0.441511	0.059224	7.45494	8.99094e-14	1.1979e-12
NIPSNAP1	8508	1524.64	0.441219	0.0600534	7.3471	2.02548e-13	2.63558e-12
TGFBR2	7048	14521.4	0.441071	0.0530025	8.32171	8.67048e-17	1.50711e-15
PTPRG	5793	4180.28	0.440922	0.0715396	6.16333	7.12324e-10	6.37264e-09
ZNF589	51385	447.439	0.440775	0.09586	4.59811	4.26333e-06	2.21649e-05
ISCU	23479	2032.81	0.440737	0.0565344	7.79592	6.39429e-15	9.39536e-14
ARL2	402	1779.16	0.440564	0.0633671	6.95257	3.58695e-12	4.1255e-11
CCDC18	343099	773.86	0.440336	0.0782291	5.6288	1.81468e-08	1.33064e-07
FLOT2	2319	1998.94	0.440308	0.0586495	7.50744	6.02928e-14	8.12694e-13
CPEB1	64506	289.73	0.440243	0.14443	3.04813	0.00230271	0.00678171
C6orf1	221491	1066.72	0.439889	0.0682205	6.44805	1.13295e-10	1.11554e-09
PKD2	5311	1915.77	0.439614	0.070645	6.22287	4.88148e-10	4.47114e-09
KDELC2	143888	4235.35	0.43958	0.0588108	7.47448	7.75074e-14	1.03437e-12
MAP9	79884	1233.39	0.439382	0.0816028	5.3844	7.26872e-08	4.89268e-07
MAPKBP1	23005	2691.32	0.439183	0.0535126	8.20709	2.26606e-16	3.78803e-15
E2F5	1875	133.063	0.438991	0.155422	2.82452	0.00473513	0.0128725
PLBD2	196463	4722.68	0.438802	0.0610196	7.19116	6.42433e-13	7.98001e-12
PPAPDC2	403313	262.96	0.438263	0.119217	3.67617	0.00023676	0.000879706
FAM86C1	55199	362.636	0.438106	0.1031	4.24931	2.14431e-05	9.87349e-05
ITPR2	3709	1121.57	0.43799	0.101498	4.31526	1.59415e-05	7.48758e-05
CALCOCO2	10241	2420.7	0.437907	0.0611861	7.15697	8.248e-13	1.01438e-11
CLCN3	1182	3655.56	0.437753	0.0613889	7.13081	9.97815e-13	1.21514e-11
DFNA5	1687	701.826	0.437481	0.0856186	5.10964	3.22767e-07	1.99619e-06
CEP97	79598	1092.07	0.436445	0.0750373	5.81637	6.01397e-09	4.72113e-08
SNTB2	6645	3452.05	0.436432	0.053192	8.20484	2.30896e-16	3.85176e-15
GMDS	2762	562.669	0.436389	0.0868979	5.02186	5.11733e-07	3.07764e-06
COX15	1355	1788.63	0.435745	0.0647619	6.72842	1.71518e-11	1.83422e-10
VANGL1	81839	2096.87	0.435424	0.0566159	7.69084	1.46176e-14	2.07969e-13
LYRM7	90624	1812.16	0.435418	0.0652819	6.6698	2.56147e-11	2.67893e-10
CTSB	1508	72545.2	0.435197	0.0541074	8.04321	8.75167e-16	1.38551e-14
LMNA	4000	36896.7	0.435118	0.0460207	9.45483	3.23555e-21	7.86861e-20
ITGA4	3676	4253.06	0.434548	0.0569801	7.62632	2.41559e-14	3.37138e-13
IDE	3416	2191.74	0.434086	0.0618917	7.01364	2.32196e-12	2.7338e-11
ZNF362	149076	236.626	0.433647	0.128902	3.36416	0.000767767	0.00254368
SOD2	6648	3971.24	0.433235	0.0576765	7.51145	5.84746e-14	7.89505e-13
LRRC20	55222	343.899	0.432956	0.110288	3.92569	8.64823e-05	0.000352122
SDCCAG8	10806	1293.69	0.43294	0.0691648	6.25954	3.8612e-10	3.5772e-09
KIAA0586	9786	1701.86	0.432538	0.0590445	7.32563	2.37774e-13	3.07905e-12
CEP57	9702	1398.51	0.432403	0.0625634	6.91143	4.7978e-12	5.45982e-11
TRIM5	85363	2140.29	0.432306	0.0764367	5.65574	1.55178e-08	1.14893e-07
TCAIM	285343	970.237	0.432266	0.0820953	5.26541	1.39873e-07	9.08191e-07
CEMP1	752014	180.224	0.43172	0.137526	3.13919	0.00169416	0.00514718
CCNG1	900	5276.07	0.431042	0.0596984	7.22033	5.18617e-13	6.46191e-12
ADAM17	6868	1419.38	0.430838	0.0656265	6.56501	5.20309e-11	5.2776e-10
POMGNT2	84892	599.147	0.430813	0.0917446	4.69578	2.65585e-06	1.42765e-05
PYCARD	29108	326.161	0.430806	0.110272	3.90676	9.35434e-05	0.000378108
FCRLB	127943	223.601	0.430778	0.131194	3.28352	0.0010252	0.00329976
SPA17	53340	390.156	0.43065	0.0997694	4.31645	1.58559e-05	7.45172e-05
SPRED2	200734	1833.67	0.430571	0.0572453	7.52151	5.41475e-14	7.32306e-13
DCLRE1A	9937	639.894	0.430566	0.0862081	4.99449	5.89908e-07	3.49957e-06
METTL4	64863	613.856	0.430376	0.0870292	4.94519	7.607e-07	4.4426e-06
BDH2	56898	711.616	0.429965	0.077426	5.55324	2.80424e-08	2.00633e-07
AGL	178	899.379	0.429629	0.0853891	5.03143	4.86844e-07	2.93561e-06
ARL15	54622	369.893	0.429547	0.115175	3.72952	0.000191841	0.000726343
BRCC3	79184	1589.42	0.429451	0.0603374	7.11749	1.09908e-12	1.33543e-11
RBFOX2	23543	8699.13	0.428932	0.0497819	8.61623	6.91958e-18	1.33657e-16
SLC35E2B	728661	724.035	0.428915	0.0854476	5.01963	5.17719e-07	3.10785e-06
PNPLA3	80339	572.968	0.428408	0.0842171	5.08694	3.63883e-07	2.23506e-06
COMMD9	29099	1223.06	0.428337	0.0637123	6.72299	1.78027e-11	1.89755e-10
INPP4B	8821	1557.28	0.427743	0.0682623	6.26616	3.70049e-10	3.4362e-09
ATL3	25923	5800.7	0.427655	0.0597123	7.16193	7.95469e-13	9.82592e-12
ACSL3	2181	7016.37	0.427215	0.0491283	8.69591	3.44051e-18	6.77528e-17
FAM64A	54478	1073.7	0.427026	0.0841392	5.07524	3.87014e-07	2.36993e-06
CYB561A3	220002	1783.44	0.426459	0.0629818	6.77115	1.27767e-11	1.38655e-10
PYGL	5836	3876.76	0.425991	0.0561267	7.58982	3.20362e-14	4.41777e-13
SPAST	6683	626.1	0.425104	0.0895165	4.74889	2.04534e-06	1.11944e-05
ADAMTS7	11173	789.969	0.424929	0.0767206	5.53866	3.04794e-08	2.17107e-07
NUCKS1	64710	14544.1	0.424917	0.0501202	8.47796	2.29174e-17	4.20534e-16
ESCO2	157570	1067.61	0.424902	0.0810124	5.2449	1.56365e-07	1.00918e-06
POLA1	5422	1532.2	0.424762	0.0673041	6.3111	2.77063e-10	2.61028e-09
PBK	55872	2707.71	0.42375	0.0685363	6.18286	6.29502e-10	5.67888e-09
PIP4K2B	8396	4301.69	0.423408	0.057852	7.31882	2.50169e-13	3.22662e-12
CDKL1	8814	421.282	0.423375	0.0991207	4.27131	1.94329e-05	8.99663e-05
SPR	6697	756.885	0.422811	0.0872473	4.84612	1.25899e-06	7.08614e-06
ENC1	8507	1906.23	0.422587	0.0669928	6.30795	2.82761e-10	2.66241e-09
CLU	1191	1221.26	0.42227	0.0921592	4.58197	4.60623e-06	2.38479e-05
AQP9	366	3472.29	0.42156	0.0694207	6.07253	1.25909e-09	1.08668e-08
PLEKHA5	54477	1023.46	0.42054	0.0726405	5.78934	7.06653e-09	5.50459e-08
POLR3H	171568	2298.02	0.420363	0.0663899	6.33173	2.42426e-10	2.30276e-09
CKAP5	9793	8838.5	0.420218	0.0482355	8.71181	2.99069e-18	5.91834e-17
ACE	1636	557.427	0.419543	0.0948644	4.42256	9.75389e-06	4.75274e-05
TAF9B	51616	1702.36	0.418889	0.0614692	6.81462	9.45108e-12	1.03891e-10
TMEM140	55281	439.631	0.418504	0.0958046	4.36831	1.25214e-05	5.98922e-05
SOX12	6666	1349.19	0.418457	0.0732583	5.71208	1.11603e-08	8.48081e-08
MMP17	4326	601.677	0.418062	0.0944372	4.42687	9.56094e-06	4.67e-05
UQCC1	55245	1724.67	0.418006	0.0590796	7.0753	1.49122e-12	1.78505e-11
C18orf54	162681	926.798	0.417926	0.0774765	5.39423	6.88183e-08	4.6497e-07
MAPRE2	10982	2265.68	0.417474	0.0547504	7.62505	2.43944e-14	3.3988e-13
MEIS1	4211	568.351	0.417394	0.0869981	4.79774	1.60465e-06	8.9136e-06
DHX40	79665	1415.82	0.417343	0.0740179	5.6384	1.71633e-08	1.26265e-07
POC1A	25886	910.937	0.417022	0.104439	3.99298	6.5249e-05	0.000272823
GSTZ1	2954	367.038	0.417017	0.117304	3.55501	0.000377959	0.00134493
FIBIN	387758	396.446	0.416888	0.108884	3.82873	0.000128804	0.000505942
ACVRL1	94	1535.59	0.416019	0.0705782	5.89445	3.75939e-09	3.03837e-08
NBN	4683	4123.14	0.416019	0.0500446	8.31297	9.33391e-17	1.61721e-15
NCAPH	23397	1926.68	0.415984	0.0928885	4.47832	7.52322e-06	3.74722e-05
H6PD	9563	3503.07	0.415465	0.0559964	7.41949	1.17569e-13	1.55616e-12
PKN1	5585	3975.35	0.415155	0.0507968	8.17286	3.01167e-16	4.97774e-15
TAF6L	10629	470.013	0.414675	0.0924731	4.48428	7.31617e-06	3.65085e-05
CRAT	1384	2277.68	0.414579	0.0628923	6.59188	4.34281e-11	4.44409e-10
IDS	3423	3273.4	0.414337	0.0749708	5.52664	3.26424e-08	2.32104e-07
DNAJC13	23317	6062.98	0.414201	0.0525234	7.88602	3.11976e-15	4.74815e-14
LANCL2	55915	1260.89	0.413947	0.0666722	6.20869	5.34282e-10	4.8661e-09
INTS3	65123	3146.4	0.413908	0.0542874	7.62438	2.45208e-14	3.41347e-13
LY6E	4061	12540.6	0.41384	0.0571315	7.24364	4.36803e-13	5.48057e-12
KIFC1	3833	2729.15	0.413545	0.0683979	6.04616	1.4834e-09	1.26406e-08
SHISA5	51246	9260.74	0.413467	0.0487965	8.4733	2.38537e-17	4.36228e-16
MMP1	4312	132321	0.413238	0.0525938	7.85717	3.92915e-15	5.8748e-14
NXPE3	91775	2624.75	0.412871	0.0699306	5.90401	3.5478e-09	2.8813e-08
CDC7	8317	837.61	0.41248	0.0804294	5.12848	2.92096e-07	1.82185e-06
CYB5A	1528	1183.48	0.412169	0.0641428	6.42579	1.31183e-10	1.28229e-09
UACA	55075	4177.67	0.411756	0.050394	8.17072	3.06551e-16	5.05638e-15
TXN2	25828	2888.24	0.411648	0.0537541	7.65798	1.88875e-14	2.66372e-13
MVK	4598	900.431	0.41146	0.0707106	5.81893	5.92256e-09	4.6539e-08
PSPH	5723	1327.77	0.411333	0.0664185	6.19305	5.90102e-10	5.34021e-09
PPP2R3A	5523	5020.21	0.411177	0.0491514	8.36553	5.98466e-17	1.05618e-15
KIAA0101	9768	1392.78	0.411114	0.0748503	5.49248	3.96318e-08	2.78008e-07
ANAPC1	64682	2894.42	0.410733	0.0563398	7.29029	3.09287e-13	3.95124e-12
ANGPTL2	23452	545.591	0.410353	0.103433	3.96732	7.26862e-05	0.000301035
CCPG1	9236	1191.95	0.409549	0.0788426	5.19452	2.05247e-07	1.30742e-06
MCFD2	90411	14600.8	0.409124	0.0490382	8.34296	7.24507e-17	1.26616e-15
SRBD1	55133	880.75	0.408946	0.0725286	5.63841	1.71629e-08	1.26265e-07
C1orf21	81563	576.204	0.408945	0.0872569	4.68667	2.77681e-06	1.48821e-05
NRP1	8829	32238.7	0.408852	0.0456026	8.96553	3.08786e-19	6.60433e-18
DTNBP1	84062	320.255	0.40848	0.115354	3.54111	0.000398452	0.00140854
LGALS3	3958	5118.71	0.408312	0.0629284	6.48851	8.66894e-11	8.62514e-10
ACAT2	39	1764.55	0.408117	0.0727583	5.60922	2.03243e-08	1.47703e-07
RMI2	116028	440.895	0.408111	0.100954	4.04254	5.28746e-05	0.000225282
MMACHC	25974	512.952	0.40785	0.090432	4.51002	6.48227e-06	3.27111e-05
SGMS2	166929	2726.2	0.407795	0.0526126	7.7509	9.12424e-15	1.32023e-13
HSD3B7	80270	4263.36	0.407656	0.0618232	6.59391	4.28405e-11	4.38674e-10
TNFRSF10C	8794	200.918	0.407433	0.140977	2.89007	0.00385154	0.0106845
KIAA1109	84162	2321.25	0.407258	0.0861474	4.72745	2.27356e-06	1.23282e-05
RNF141	50862	1533.61	0.407235	0.0665116	6.12278	9.19588e-10	8.08796e-09
NME3	4832	417.925	0.407204	0.09758	4.17303	3.00579e-05	0.000134939
PQLC3	130814	642.564	0.407203	0.0865616	4.7042	2.54863e-06	1.37367e-05
NTSR1	4923	1887.72	0.407189	0.0858975	4.7404	2.13294e-06	1.16243e-05
C11orf54	28970	449.947	0.407179	0.0940293	4.33034	1.48876e-05	7.02733e-05
RNASET2	8635	266.73	0.407112	0.120489	3.37882	0.000727977	0.00242279
CD109	135228	29149.8	0.407029	0.0812632	5.00878	5.47761e-07	3.26754e-06
NCSTN	23385	5345.54	0.407005	0.0527557	7.71491	1.21072e-14	1.7363e-13
SLC43A3	29015	6201.34	0.406627	0.0605122	6.71974	1.82043e-11	1.93828e-10
LHFP	10186	1872.75	0.406489	0.0568942	7.14465	9.02248e-13	1.10543e-11
FAM229B	619208	211.25	0.406203	0.131905	3.07951	0.00207341	0.00617397
CREBL2	1389	1559.55	0.405105	0.0688024	5.88794	3.9103e-09	3.15245e-08
NNT	23530	2577.12	0.404933	0.0561966	7.20565	5.77677e-13	7.19224e-12
RBM3	5935	11415.7	0.404845	0.0419307	9.65511	4.67671e-22	1.18226e-20
FAM72A	729533	113.782	0.40349	0.16101	2.50599	0.0122109	0.029598
BLVRA	644	993.571	0.40347	0.0729162	5.53334	3.14182e-08	2.23597e-07
EPRS	2058	11905.4	0.403144	0.0516348	7.80759	5.82906e-15	8.61209e-14
TMEM109	79073	5163.8	0.402983	0.0498115	8.09016	5.95869e-16	9.61248e-15
STARD5	80765	241.089	0.402937	0.130324	3.0918	0.00198948	0.00595037
VPS13B	157680	2082.01	0.40273	0.0739303	5.44743	5.11034e-08	3.52506e-07
FZR1	51343	1638.67	0.402672	0.0622951	6.46393	1.02016e-10	1.00879e-09
ATRX	546	2864.32	0.402449	0.0739365	5.44317	5.23403e-08	3.60577e-07
AGRN	375790	3504.55	0.402003	0.0814721	4.93425	8.04603e-07	4.66216e-06
TMEM218	219854	522.628	0.401877	0.0935843	4.29427	1.75266e-05	8.17505e-05
GPD1L	23171	1216.62	0.401846	0.0691798	5.80871	6.29544e-09	4.9301e-08
ZBTB47	92999	1118.02	0.401794	0.0813876	4.93679	7.94176e-07	4.61308e-06
TCTN3	26123	3060.7	0.401595	0.0517341	7.76267	8.31603e-15	1.20871e-13
ATP5S	27109	383.411	0.401558	0.0994959	4.03592	5.43878e-05	0.00023118
EFCAB7	84455	222.955	0.401011	0.127073	3.15574	0.0016009	0.0048933
DHCR24	1718	13529.9	0.400999	0.0404408	9.91572	3.55697e-23	9.71877e-22
NDRG3	57446	2113.02	0.400917	0.0643944	6.22596	4.78623e-10	4.38887e-09
PLA2G12A	81579	281.283	0.400775	0.120563	3.32421	0.000886693	0.00289142
IFIT1	3434	3943.7	0.40044	0.0888023	4.50934	6.50298e-06	3.27952e-05
HSPB1	3315	5924.38	0.400402	0.0522319	7.66586	1.77636e-14	2.51179e-13
MBLAC2	153364	522.024	0.400402	0.0995606	4.02168	5.77834e-05	0.000244519
RAVER2	55225	497.378	0.399983	0.0954795	4.1892	2.79936e-05	0.000126586
MRE11A	4361	1418.94	0.399404	0.0656239	6.08626	1.1558e-09	1.00397e-08
ENDOD1	23052	3136.64	0.399149	0.0589327	6.77297	1.26168e-11	1.37196e-10
METTL8	79828	2129.01	0.39907	0.0573206	6.96207	3.35308e-12	3.87584e-11
CD46	4179	5995.94	0.399028	0.0597858	6.6743	2.48414e-11	2.60818e-10
SPHK2	56848	632.91	0.398554	0.0854832	4.66236	3.12603e-06	1.65886e-05
PRC1	9055	6195.57	0.398406	0.076793	5.18806	2.125e-07	1.34937e-06
MFAP2	4237	609.088	0.398386	0.0965325	4.12696	3.67584e-05	0.000162179
CD47	961	3701.19	0.398171	0.0583563	6.8231	8.90946e-12	9.8339e-11
PGS1	9489	1004.14	0.397739	0.0714005	5.57054	2.53948e-08	1.82175e-07
SHPK	23729	1007.18	0.397581	0.0769851	5.16439	2.41226e-07	1.51864e-06
TCEANC2	127428	503.709	0.397398	0.092431	4.2994	1.71259e-05	8.00665e-05
CES2	8824	1448.64	0.397396	0.0626501	6.3431	2.25181e-10	2.14273e-09
PCDHGC3	5098	2533.02	0.396947	0.0734014	5.4079	6.3768e-08	4.32658e-07
CDC25B	994	4742.9	0.396799	0.0489017	8.11422	4.88928e-16	7.95888e-15
PCMTD2	55251	970.288	0.396793	0.0782852	5.06855	4.00847e-07	2.44814e-06
MEPCE	56257	2114.12	0.396634	0.0575336	6.89396	5.42618e-12	6.1446e-11
UBFD1	56061	3844.39	0.396285	0.0470422	8.42403	3.63749e-17	6.57026e-16
LRRC16A	55604	1081.78	0.396203	0.0765573	5.17525	2.27608e-07	1.43908e-06
KIAA0319L	79932	1549.39	0.396047	0.0650076	6.09232	1.11288e-09	9.69323e-09
TCEA2	6919	148.676	0.396036	0.159796	2.47838	0.0131979	0.0317001
FABP5	2171	146.036	0.395319	0.153489	2.57556	0.0100078	0.0249085
POMK	84197	229.013	0.39498	0.127893	3.08838	0.00201252	0.00601372
EXOC6B	23233	2063.33	0.394885	0.0720998	5.47692	4.32785e-08	3.02145e-07
ANAPC13	25847	3924.3	0.394227	0.0468101	8.42182	3.70666e-17	6.68025e-16
ITPK1	3705	1669.46	0.394048	0.0593461	6.63983	3.1405e-11	3.26127e-10
GTF2H2	2966	504.977	0.393985	0.0881705	4.46845	7.87902e-06	3.91237e-05
FUT10	84750	633.562	0.393615	0.085681	4.59396	4.34915e-06	2.25748e-05
SNPH	9751	592.137	0.393346	0.112531	3.49544	0.000473272	0.00164707
AKAP2	11217	246.177	0.393063	0.138405	2.83996	0.00451196	0.0123177
CAPNS1	826	13960.7	0.392866	0.0469928	8.36013	6.26496e-17	1.10203e-15
SLC35E2	9906	451.487	0.392677	0.0975266	4.02636	5.66477e-05	0.000240091
PLEKHA8	84725	840.559	0.392668	0.0833444	4.71139	2.46037e-06	1.32876e-05
FBXO4	26272	330.075	0.392298	0.113601	3.45329	0.000553792	0.00190309
C2CD5	9847	1494.04	0.392166	0.0653553	6.00052	1.96686e-09	1.6568e-08
PAX9	5083	190.913	0.391887	0.133855	2.9277	0.00341475	0.00961321
COX14	84987	463.114	0.391553	0.0933036	4.19655	2.71012e-05	0.000122826
RASSF3	283349	1058.71	0.391478	0.0679515	5.76114	8.3546e-09	6.44578e-08
VAT1	10493	12552.4	0.391288	0.0476915	8.20456	2.31429e-16	3.85667e-15
BTBD9	114781	639.696	0.391199	0.0855397	4.57331	4.8009e-06	2.47842e-05
RHNO1	83695	1175.18	0.391095	0.0762304	5.13043	2.89078e-07	1.80372e-06
EHMT2	10919	2038.96	0.390358	0.0579092	6.74087	1.57441e-11	1.69153e-10
MIS18BP1	55320	1863.07	0.390073	0.064448	6.05253	1.42591e-09	1.219e-08
TOM1L1	10040	562.201	0.390004	0.0865935	4.50385	6.67349e-06	3.35921e-05
MGME1	92667	1753.64	0.389838	0.0607974	6.41209	1.43536e-10	1.39292e-09
FST	10468	5220.03	0.389199	0.0481533	8.08249	6.34563e-16	1.01858e-14
PCK2	5106	1266.09	0.3891	0.071742	5.42359	5.84134e-08	3.98673e-07
STAT2	6773	5338.16	0.389058	0.0783989	4.96255	6.95729e-07	4.07939e-06
B9D2	80776	128.925	0.388733	0.156848	2.47841	0.013197	0.0317001
COMMD4	54939	1758.02	0.38861	0.0589333	6.59406	4.2795e-11	4.38486e-10
SLCO3A1	28232	779.497	0.388566	0.0761785	5.10074	3.38328e-07	2.08524e-06
SGSH	6448	1933.13	0.388469	0.0606382	6.40634	1.49056e-10	1.44388e-09
CDC42EP4	23580	2882.48	0.388404	0.0545812	7.11607	1.11052e-12	1.34731e-11
NFS1	9054	1547.69	0.388371	0.0666308	5.8287	5.58601e-09	4.40875e-08
PUS7L	83448	2227.5	0.388088	0.0615526	6.30499	2.88213e-10	2.709e-09
PDE4DIP	9659	3488.12	0.387776	0.0555504	6.98062	2.93879e-12	3.42146e-11
CBR3	874	328.748	0.38746	0.104527	3.70681	0.000209889	0.000788024
KHDRBS3	10656	667.945	0.387395	0.0920976	4.20635	2.59527e-05	0.000118052
2002-03-01	51257	368.375	0.387357	0.10138	3.82084	0.000132999	0.000521024
PDSS2	57107	1013.73	0.387281	0.0741423	5.22348	1.7559e-07	1.12606e-06
FAM111A	63901	2470.19	0.387218	0.0639764	6.05252	1.42599e-09	1.219e-08
ZHX1	11244	2481.43	0.387057	0.0543409	7.12274	1.058e-12	1.28649e-11
GXYLT1	283464	1698.89	0.386923	0.0601023	6.43775	1.21258e-10	1.19322e-09
CASP8	841	1531.8	0.386765	0.0602576	6.41853	1.37598e-10	1.34013e-09
TMPO	7112	8049.06	0.38675	0.0652827	5.92423	3.13771e-09	2.5772e-08
NIN	51199	5373.52	0.386507	0.0507571	7.61483	2.6404e-14	3.66299e-13
ATP10D	57205	1516.17	0.38632	0.0745011	5.18542	2.15527e-07	1.36752e-06
MND1	84057	318.192	0.386214	0.112407	3.43585	0.000590705	0.00201417
MGST2	4258	154.769	0.386201	0.145206	2.65967	0.00782168	0.0200898
SUOX	6821	388.605	0.385366	0.103508	3.72307	0.000196817	0.000743439
UBXN11	91544	325.244	0.385299	0.106294	3.62483	0.000289148	0.00105589
GOLM1	51280	5388.22	0.385261	0.045854	8.4019	4.39328e-17	7.87377e-16
MR1	3140	1192.48	0.385252	0.0698924	5.51207	3.5464e-08	2.51062e-07
VPS41	27072	2015.19	0.384975	0.0614866	6.26112	3.82219e-10	3.54309e-09
GAS2L3	283431	1335.31	0.384929	0.088029	4.37275	1.2269e-05	5.88416e-05
HYAL3	8372	174.717	0.384821	0.141103	2.72723	0.00638683	0.0168109
ZNF318	24149	1418.6	0.384808	0.0705607	5.45357	4.93694e-08	3.41567e-07
IQCG	84223	315.832	0.384521	0.110259	3.48743	0.000487679	0.00169392
OIP5	11339	306.369	0.384318	0.13005	2.95516	0.00312511	0.00887986
FEZ1	9638	1666.69	0.384192	0.0577306	6.65492	2.83454e-11	2.95114e-10
LOC100506248	100506248	251.067	0.38413	0.11879	3.23368	0.00122206	0.00385576
ELP4	26610	746.777	0.383229	0.0756903	5.06312	4.12456e-07	2.51429e-06
CLIP3	25999	1071.91	0.382903	0.111085	3.44694	0.000566967	0.00194176
DHRS4	10901	419.178	0.382888	0.0965758	3.96464	7.35067e-05	0.000303966
SLC9A9	285195	428.899	0.3827	0.0959596	3.98814	6.65936e-05	0.000277582
RSRC1	51319	932.513	0.382583	0.0710481	5.38484	7.25082e-08	4.88266e-07
ROBO1	6091	4403.03	0.382465	0.0539156	7.09377	1.30507e-12	1.57368e-11
APEX1	328	6836.81	0.382157	0.0511798	7.46696	8.20703e-14	1.09436e-12
CHP1	11261	4463.24	0.381913	0.0475437	8.03287	9.52177e-16	1.49715e-14
PLEKHH3	79990	339.325	0.38185	0.107494	3.55228	0.000381904	0.00135777
IFT81	28981	537.842	0.38168	0.096856	3.94069	8.12465e-05	0.000332903
CEP44	80817	784.308	0.381004	0.0786512	4.84422	1.27107e-06	7.15165e-06
ORAI3	93129	275.756	0.380886	0.120515	3.16048	0.00157511	0.00482453
ADGRL2	23266	2373.49	0.380782	0.0642157	5.92974	3.03416e-09	2.49596e-08
BRMS1L	84312	626.374	0.380731	0.0832005	4.57607	4.73796e-06	2.44749e-05
DYRK4	8798	717.342	0.380664	0.0858987	4.43155	9.35598e-06	4.57681e-05
KIAA1598	57698	407.484	0.3806	0.113002	3.36807	0.000756975	0.00250947
MSL3	10943	1254.92	0.380559	0.0663006	5.7399	9.47324e-09	7.26717e-08
PSRC1	84722	921.466	0.380367	0.10262	3.70657	0.000210085	0.000788574
DIAPH2	1730	1542.1	0.379826	0.081278	4.67317	2.96588e-06	1.58063e-05
CARD6	84674	484.64	0.379785	0.106906	3.5525	0.000381582	0.00135722
SNTB1	6641	641.633	0.379507	0.108236	3.50629	0.000454392	0.00158768
FBXL17	64839	774.341	0.379322	0.0807118	4.6997	2.6054e-06	1.40193e-05
MELK	9833	2991.76	0.37912	0.0714784	5.30398	1.13305e-07	7.42549e-07
EIF2AK2	5610	4262.85	0.379046	0.0898123	4.22042	2.43844e-05	0.000111173

## Sheet: Down Regulated Genes
All significantly down regulated genes determined by DESeq2, fold change greater than 1.3, going down from an FPKM of at least 2
Gene Symbol	Gene_ID	baseMean	log2FoldChange	lfcSE	stat	pvalue	padj
SAMD11	148398	605.077	-3.70024	0.21793	-16.979	1.17488e-64	1.82422e-62
ANKRD1	27063	3027.36	-3.45678	0.0719554	-48.0406	0	0
COMP	1311	733.987	-3.16666	0.102028	-31.0373	1.6934e-211	3.41814e-208
DIRAS3	9077	8474.43	-3.14056	0.0775189	-40.5134	0	0
LRRN3	54674	224.606	-3.13906	0.15728	-19.9585	1.26567e-88	3.40634e-86
CDH20	28316	286.257	-3.07971	0.139272	-22.1129	2.37507e-108	1.00928e-105
PPP1R14C	81706	271.711	-3.06999	0.152712	-20.1032	6.9223e-90	1.99609e-87
MMP10	4319	216.167	-3.04888	0.164245	-18.563	6.40423e-77	1.34306e-74
CRYM	1428	259.996	-2.99299	0.166971	-17.9253	7.49013e-72	1.39024e-69
EGR2	1959	148.943	-2.74924	0.179899	-15.2821	1.00627e-52	1.09792e-50
IGSF9B	22997	331.323	-2.73479	0.129841	-21.0626	1.7538e-98	5.77966e-96
HSD11B1	3290	444.81	-2.70637	0.120622	-22.4368	1.72102e-111	7.71972e-109
ATF3	467	3762.43	-2.68822	0.154231	-17.4298	4.90372e-68	8.16343e-66
CYP1A1	1543	151.269	-2.66174	0.171256	-15.5424	1.79056e-54	2.09522e-52
HS3ST2	9956	1579.1	-2.6044	0.166562	-15.6362	4.12632e-55	4.89939e-53
DLX2	1746	412.04	-2.57515	0.139032	-18.522	1.37333e-76	2.84314e-74
CXCL8	3576	1471.51	-2.53965	0.103847	-24.4558	4.36818e-132	2.71297e-129
SMAD6	4091	253.402	-2.51643	0.133886	-18.7954	8.243e-79	1.8234e-76
C1orf162	128346	95.7792	-2.49195	0.207447	-12.0125	3.05574e-33	1.52768e-31
PPAPDC1A	196051	323.943	-2.47204	0.122792	-20.1319	3.87969e-90	1.13908e-87
SMAD7	4092	898.382	-2.40813	0.0870323	-27.6694	1.6318e-168	1.88216e-165
PODXL	5420	12603.2	-2.40803	0.139764	-17.2293	1.60168e-66	2.53568e-64
PENK	5179	1144.96	-2.30145	0.0835377	-27.5498	4.45159e-167	4.79229e-164
SMAD9	4093	995.897	-2.24507	0.0832034	-26.9829	2.34812e-160	2.36985e-157
AREG	374	407.161	-2.23918	0.1266	-17.6871	5.27062e-70	9.05426e-68
ID1	3397	4943.33	-2.21355	0.0706239	-31.3428	1.22025e-215	2.81495e-212
CES1	1066	2664.66	-2.20931	0.0599039	-36.8809	9.36172e-298	3.77933e-294
LBH	81606	505.875	-2.1842	0.120036	-18.1962	5.53056e-74	1.06318e-71
PMEPA1	56937	1613.53	-2.167	0.0960773	-22.5548	1.20545e-112	5.72516e-110
CXCL12	6387	1606.84	-2.152	0.100694	-21.3716	2.4551e-101	8.43509e-99
LSMEM1	286006	182.413	-2.13747	0.169121	-12.6387	1.29237e-36	7.37427e-35
PTGS2	5743	1122.22	-2.13672	0.0918111	-23.273	8.31523e-120	4.63015e-117
NGF	4803	237.364	-2.1256	0.13727	-15.4848	4.39721e-54	5.10835e-52
IL11	3589	542.58	-2.09475	0.100182	-20.9095	4.38757e-97	1.41701e-94
RSAD2	91543	2885.75	-2.04563	0.0885213	-23.1089	3.76905e-118	1.96331e-115
CCL5	6352	665.768	-2.03554	0.0999011	-20.3755	2.75658e-92	8.72809e-90
STATH	6779	21.8639	-2.02435	0.27557	-7.34605	2.04143e-13	2.65419e-12
NPIPB6	728741	23.4396	-2.01169	0.273476	-7.35599	1.89514e-13	2.47594e-12
TNC	3371	54605.3	-2.0086	0.0501031	-40.0893	0	0
RLTPR	146206	429.698	-1.99593	0.10892	-18.3246	5.26189e-75	1.049e-72
NR1D1	9572	1604.37	-1.9867	0.0881298	-22.5429	1.57718e-112	7.27664e-110
ID3	3399	5477.55	-1.98463	0.0653689	-30.3605	1.82696e-202	3.27798e-199
IGFBP3	3486	6088.84	-1.97866	0.0755486	-26.1906	3.40104e-151	2.89053e-148
CRLF1	9244	3156.24	-1.96095	0.0612253	-32.0284	4.38582e-225	1.41644e-221
BEX2	84707	63.9884	-1.94676	0.232219	-8.38329	5.147e-17	9.17369e-16
SNAI1	6615	1203.85	-1.93347	0.0884068	-21.8701	5.00316e-106	2.01977e-103
ATOH8	84913	1509.02	-1.9308	0.0748409	-25.7988	9.15484e-147	7.39162e-144
MXRA5	25878	584.816	-1.92438	0.234951	-8.19057	2.59983e-16	4.31914e-15
LIF	3976	297.624	-1.90375	0.139071	-13.6891	1.17935e-42	9.02567e-41
HOXB9	3219	269.106	-1.87473	0.125172	-14.9772	1.03411e-50	1.05688e-48
TSLP	85480	92.9351	-1.87391	0.200911	-9.32706	1.08851e-20	2.53275e-19
FAM83G	644815	2294.23	-1.87068	0.0923052	-20.2662	2.5553e-91	7.78547e-89
VGF	7425	1059.1	-1.83857	0.0967505	-19.0032	1.60459e-80	3.64943e-78
PLA2G4C	8605	285.5	-1.82688	0.139341	-13.1108	2.85458e-39	1.82197e-37
PLXNC1	10154	391.367	-1.81552	0.144278	-12.5834	2.60485e-36	1.46561e-34
SKIL	6498	1489	-1.79045	0.0683227	-26.2057	2.28571e-151	2.05054e-148
TPM1	7168	11023.2	-1.786	0.0700578	-25.4932	2.34591e-143	1.7219e-140
PPP1R13L	10848	800.532	-1.78178	0.0890746	-20.0032	5.16547e-89	1.43814e-86
GPR137C	283554	292.466	-1.76181	0.133051	-13.2416	5.0471e-40	3.31303e-38
HES1	3280	167.933	-1.75453	0.17251	-10.1706	2.68295e-24	7.99341e-23
KLF10	7071	5877.55	-1.75161	0.0555499	-31.5323	3.14023e-218	8.4514e-215
ZNF844	284391	527.578	-1.74062	0.117106	-14.8637	5.66926e-50	5.54831e-48
ARRDC4	91947	1460.42	-1.73993	0.0725343	-23.9878	3.73184e-127	2.15221e-124
INHBA	3624	2464.52	-1.73304	0.0969117	-17.8827	1.60928e-71	2.91985e-69
HERC5	51191	1638.95	-1.70906	0.168165	-10.163	2.90035e-24	8.60936e-23
MMP3	4314	85730	-1.68698	0.204437	-8.25184	1.55975e-16	2.65684e-15
BMP6	654	332.096	-1.68536	0.124672	-13.5184	1.21815e-41	8.82094e-40
DSP	1832	1568.43	-1.68313	0.0789219	-21.3265	6.4476e-101	2.16908e-98
TBX21	30009	1414.88	-1.68059	0.102178	-16.4477	8.70652e-61	1.2666e-58
SH3D21	79729	275.338	-1.64647	0.1471	-11.1929	4.41855e-29	1.77489e-27
MMP12	4321	703.337	-1.61648	0.0949535	-17.0239	5.45871e-65	8.55799e-63
ZNF469	84627	945.453	-1.61252	0.1104	-14.6062	2.56558e-48	2.31446e-46
CIART	148523	103.677	-1.59802	0.179019	-8.92655	4.39495e-19	9.32585e-18
TAGLN3	29114	203.144	-1.59457	0.139316	-11.4457	2.47097e-30	1.0755e-28
GOLGA8A	23015	611.077	-1.59388	0.106398	-14.9805	9.85215e-51	1.01333e-48
DPT	1805	86.7924	-1.59182	0.186499	-8.53526	1.39844e-17	2.61365e-16
CSRNP1	64651	1214.68	-1.58375	0.0729998	-21.6953	2.27089e-104	8.52797e-102
ITGA6	3655	1094.92	-1.57601	0.0691282	-22.7984	4.75405e-115	2.32632e-112
SPAG4	6676	104.421	-1.56959	0.190949	-8.21996	2.0357e-16	3.42422e-15
PRRX2	51450	2162.43	-1.56841	0.0586187	-26.7561	1.04836e-157	9.95823e-155
TAGLN	6876	646.176	-1.56621	0.0983383	-15.9267	4.13442e-57	5.38408e-55
IL6	3569	424.076	-1.56571	0.137247	-11.4079	3.81755e-30	1.63517e-28
ALPK2	115701	820.574	-1.55607	0.105352	-14.7702	2.28163e-49	2.19308e-47
APCDD1L	164284	7281.93	-1.5458	0.0760707	-20.3205	8.46665e-92	2.62922e-89
ID2	3398	1547.6	-1.5407	0.0634061	-24.299	2.0106e-130	1.20249e-127
HSD17B2	3294	272.849	-1.53268	0.13543	-11.3171	1.07941e-29	4.48078e-28
ZNF433	163059	251.665	-1.52487	0.136763	-11.1497	7.18351e-29	2.85011e-27
TMEM176A	55365	180.148	-1.52184	0.144582	-10.5258	6.56873e-26	2.18255e-24
P3H2	55214	236.905	-1.51839	0.128718	-11.7963	4.07938e-32	1.94318e-30
KDM7A	80853	729.081	-1.51772	0.0945413	-16.0535	5.40017e-58	7.26682e-56
IFITM10	402778	191.966	-1.51526	0.137642	-11.0087	3.47059e-28	1.32804e-26
NDUFA4L2	56901	66.0805	-1.50667	0.216535	-6.9581	3.44904e-12	3.97822e-11
SCG5	6447	1096.01	-1.49069	0.108665	-13.7182	7.9026e-43	6.1058e-41
CH25H	9023	64.2214	-1.4873	0.221589	-6.71197	1.92017e-11	2.03859e-10
HTRA3	94031	801.478	-1.47636	0.100098	-14.7491	3.11891e-49	2.94527e-47
IFIT2	3433	7765.63	-1.44773	0.133763	-10.8231	2.67623e-27	9.68963e-26
ZNF44	51710	524.829	-1.44701	0.106143	-13.6326	2.56167e-42	1.93298e-40
SYTL3	94120	555.738	-1.43867	0.0974965	-14.7562	2.80838e-49	2.68342e-47
CD274	29126	583.943	-1.42862	0.110085	-12.9774	1.64307e-38	1.01268e-36
CCL20	6364	70.8276	-1.40402	0.209922	-6.68826	2.25835e-11	2.37885e-10
TNFRSF10D	8793	8053.02	-1.40242	0.070964	-19.7624	6.27654e-87	1.60879e-84
FILIP1L	11259	5010.4	-1.38958	0.0492675	-28.2048	5.10653e-175	6.3431e-172
ADGRG1	9289	341.196	-1.38935	0.126962	-10.9431	7.17431e-28	2.67554e-26
SPHK1	8877	9280.62	-1.38705	0.0740818	-18.7233	3.20004e-78	6.98301e-76
CRISPLD2	83716	6657.6	-1.38576	0.0746292	-18.5687	5.7624e-77	1.22436e-74
PTPRN	5798	1013.37	-1.38017	0.0997629	-13.8345	1.57743e-43	1.22463e-41
GABARAPL1	23710	602.478	-1.37969	0.0936742	-14.7286	4.22068e-49	3.91699e-47
KLF4	9314	4073.05	-1.36323	0.086572	-15.7467	7.23073e-56	8.8456e-54
PSD4	23550	455.684	-1.36129	0.10517	-12.9438	2.54812e-38	1.5586e-36
ADAMTS5	11096	812.892	-1.34481	0.100744	-13.3488	1.20309e-40	8.23196e-39
BGN	633	4857.76	-1.34012	0.0725469	-18.4724	3.44376e-76	7.03922e-74
RHOB	388	5320.49	-1.33613	0.0534749	-24.9861	8.66082e-138	5.5942e-135
GRB14	2888	97.0606	-1.32806	0.199103	-6.67021	2.55446e-11	2.67332e-10
ZSWIM4	65249	334.362	-1.31804	0.116097	-11.3528	7.17904e-30	3.03474e-28
HES4	57801	71.2478	-1.31192	0.213665	-6.1401	8.24715e-10	7.30126e-09
SERPINB10	5273	124.754	-1.31179	0.17634	-7.43895	1.01485e-13	1.34879e-12
CD79A	973	50.5915	-1.30704	0.232427	-5.62346	1.87167e-08	1.36821e-07
KRT7	3855	235.442	-1.30468	0.164568	-7.92796	2.22781e-15	3.43598e-14
TMEM176B	28959	326.437	-1.30248	0.115999	-11.2284	2.95871e-29	1.2065e-27
NEBL	10529	348.924	-1.30188	0.108295	-12.0217	2.73426e-33	1.37548e-31
KIAA1644	85352	486.724	-1.2832	0.09915	-12.942	2.60765e-38	1.58899e-36
MAFF	23764	1933.95	-1.28218	0.0891607	-14.3805	6.85521e-47	5.9515e-45
GATA2	2624	697.559	-1.27425	0.0944315	-13.494	1.69741e-41	1.20218e-39
GADD45B	4616	4156.13	-1.27366	0.0830025	-15.3449	3.83336e-53	4.32874e-51
TMEM41B	440026	3537.38	-1.26473	0.0731651	-17.286	5.99862e-67	9.68657e-65
IGFBP7	3490	2454.69	-1.26301	0.0586591	-21.5314	7.90949e-103	2.83828e-100
NPAS1	4861	710.693	-1.26012	0.0849237	-14.8383	8.28094e-50	8.05545e-48
BIRC3	330	1165.29	-1.25864	0.0965537	-13.0357	7.66792e-39	4.81796e-37
DDIT3	1649	1410.89	-1.2519	0.0948097	-13.2043	8.28449e-40	5.41611e-38
TUFT1	7286	223.367	-1.25176	0.152198	-8.2245	1.96001e-16	3.31417e-15
MARCKSL1	65108	757.902	-1.23707	0.079202	-15.6191	5.39507e-55	6.35909e-53
IL1RL1	9173	2884.65	-1.23531	0.0680523	-18.1524	1.22915e-73	2.3351e-71
NR1D2	9975	1725.46	-1.23508	0.0635254	-19.4423	3.38423e-84	8.28008e-82
RORA	6095	348.234	-1.23307	0.135853	-9.07651	1.12117e-19	2.4733e-18
SGIP1	84251	1335.64	-1.21857	0.0849519	-14.3442	1.15808e-46	9.79096e-45
ARRDC3	57561	2845.38	-1.21375	0.0700427	-17.3288	2.85428e-67	4.65564e-65
KIF7	374654	2037.21	-1.21046	0.0658131	-18.3924	1.51238e-75	3.05275e-73
SNAPC1	6617	3119.34	-1.20993	0.0919454	-13.1593	1.50534e-39	9.68455e-38
AKR1C1	1645	23056.2	-1.20857	0.0759045	-15.9222	4.44207e-57	5.73845e-55
ELFN2	114794	742.544	-1.20756	0.0822066	-14.6893	7.54577e-49	6.9628e-47
CCNL1	57018	4344.87	-1.1996	0.0690757	-17.3664	1.48156e-67	2.44125e-65
HIST1H3D	8351	41.5932	-1.19589	0.250248	-4.77881	1.76333e-06	9.74811e-06
HIST1H2BG	8339	65.5964	-1.1955	0.225264	-5.30712	1.1137e-07	7.31652e-07
ZNF627	199692	526.854	-1.18855	0.108412	-10.9633	5.73826e-28	2.15492e-26
KLF2	10365	184.736	-1.18077	0.145388	-8.12153	4.60333e-16	7.50854e-15
TXNIP	10628	10846.2	-1.1771	0.0664651	-17.7101	3.5047e-70	6.08536e-68
BMP2	650	353.613	-1.17474	0.235125	-4.99624	5.84593e-07	3.47163e-06
DKK1	22943	17995.3	-1.16995	0.0726999	-16.0929	2.85974e-58	3.91348e-56
CXCL3	2921	400.699	-1.16235	0.138089	-8.41743	3.84826e-17	6.91232e-16
GEM	2669	1767.65	-1.16096	0.072114	-16.099	2.59192e-58	3.57729e-56
FBXO32	114907	193.191	-1.15885	0.133661	-8.67008	4.3181e-18	8.45196e-17
SERTAD1	29950	1807.34	-1.15403	0.057751	-19.9829	7.76565e-89	2.12542e-86
S1PR1	1901	589.24	-1.15287	0.120325	-9.58131	9.58257e-22	2.38427e-20
DGKI	9162	327.384	-1.14856	0.118296	-9.70917	2.75579e-22	7.06357e-21
PLK2	10769	740.818	-1.14847	0.109812	-10.4585	1.33986e-25	4.37978e-24
TIMP3	7078	18320.4	-1.13769	0.0561531	-20.2605	2.86928e-91	8.58022e-89
LTK	4058	185.58	-1.136	0.167105	-6.79809	1.06018e-11	1.15831e-10
HSPB7	27129	2088	-1.13529	0.0996952	-11.3876	4.82252e-30	2.06016e-28
ADAM12	8038	4733.35	-1.12467	0.0837509	-13.4288	4.10232e-41	2.86772e-39
RSRC2	65117	3838.8	-1.12175	0.0798281	-14.0521	7.4814e-45	6.04048e-43
KLF15	28999	183.413	-1.12047	0.147133	-7.61537	2.62942e-14	3.65089e-13
MT1A	4489	890.123	-1.11407	0.0946375	-11.772	5.44324e-32	2.5701e-30
FRMD3	257019	4278.18	-1.1121	0.0487504	-22.8121	3.48148e-115	1.75684e-112
MYO10	4651	5470.76	-1.10682	0.0495991	-22.3153	2.62627e-110	1.14619e-107
WNK4	65266	816.184	-1.10668	0.0791825	-13.9763	2.17432e-44	1.73816e-42
HR	55806	404.788	-1.10513	0.114252	-9.67271	3.93827e-22	9.99924e-21
PCOLCE2	26577	604.487	-1.1039	0.0924374	-11.9421	7.13689e-33	3.49232e-31
CABLES1	91768	557.239	-1.10205	0.0994592	-11.0804	1.56119e-28	6.10415e-27
ATP10A	57194	2149.73	-1.10184	0.0603654	-18.2528	1.96714e-74	3.82715e-72
IER5L	389792	438.528	-1.09992	0.0979694	-11.2272	2.99807e-29	1.21947e-27
PFKFB3	5209	2684.45	-1.09896	0.0689308	-15.9429	3.18973e-57	4.22194e-55
CREB5	9586	943.821	-1.09688	0.0865501	-12.6734	8.3065e-37	4.80765e-35
LFNG	3955	219.644	-1.09578	0.125145	-8.75607	2.02171e-18	4.05548e-17
ENAH	55740	7486.35	-1.09069	0.050667	-21.5267	8.75263e-103	3.07255e-100
ISG20	3669	369.236	-1.08669	0.11173	-9.72609	2.33391e-22	6.03974e-21
CYGB	114757	261.235	-1.08411	0.137316	-7.895	2.90322e-15	4.43111e-14
CLK1	1195	2014.48	-1.07794	0.080664	-13.3633	9.90238e-41	6.86281e-39
ETS2	2114	3188.32	-1.07711	0.056831	-18.9528	4.18392e-80	9.38359e-78
CDH2	1000	978.3	-1.06774	0.073872	-14.4539	2.36946e-47	2.10231e-45
GADD45A	1647	4913.5	-1.06597	0.0741738	-14.3713	7.83909e-47	6.76929e-45
RELB	5971	987.815	-1.06089	0.0899448	-11.7949	4.14468e-32	1.9629e-30
ZNF14	7561	222.877	-1.0554	0.145065	-7.27534	3.45549e-13	4.37298e-12
TAF1D	79101	2380.88	-1.05506	0.0790179	-13.3522	1.15034e-40	7.90455e-39
ZSCAN9	7746	305.284	-1.05424	0.12057	-8.74385	2.25292e-18	4.48031e-17
HAS2	3037	8281.3	-1.05392	0.0755606	-13.948	3.23731e-44	2.56255e-42
IL24	11009	643.819	-1.0531	0.0917412	-11.479	1.68256e-30	7.42348e-29
ABCC3	8714	4900.62	-1.05206	0.0694904	-15.1397	8.86002e-52	9.35108e-50
TSPAN13	27075	1858.6	-1.05163	0.073273	-14.3521	1.033e-46	8.8259e-45
KLHL17	339451	1272.07	-1.05001	0.0909441	-11.5457	7.75918e-31	3.47078e-29
IFRD1	3475	2192.38	-1.04683	0.0833161	-12.5645	3.30831e-36	1.82954e-34
ITGB3	3690	4458.69	-1.04386	0.0734662	-14.2087	8.09086e-46	6.66588e-44
HEY1	23462	208.947	-1.04343	0.129037	-8.08629	6.15121e-16	9.90326e-15
PPP1R15A	23645	9844.15	-1.04114	0.077324	-13.4646	2.52655e-41	1.7816e-39
GZF1	64412	1414.46	-1.03892	0.0677375	-15.3374	4.29854e-53	4.82034e-51
ZNF34	80778	195.587	-1.03838	0.146173	-7.10381	1.21365e-12	1.46692e-11
AGAP6	414189	516.299	-1.03602	0.102615	-10.0962	5.74519e-24	1.65371e-22
LY6K	54742	1011.17	-1.03498	0.0844933	-12.2492	1.69619e-34	8.77886e-33
CXCL11	6373	118.535	-1.03371	0.172771	-5.98316	2.18854e-09	1.83207e-08
IFIH1	64135	2005.99	-1.0322	0.0852944	-12.1017	1.03494e-33	5.27197e-32
ANGPTL4	51129	7029.04	-1.0309	0.0721528	-14.2877	2.61011e-46	2.18383e-44
CAPRIN2	65981	1632.48	-1.03044	0.0636551	-16.1878	6.14827e-59	8.63325e-57
PELI1	57162	370.667	-1.02606	0.105273	-9.74668	1.90605e-22	4.95635e-21
TGFBI	7045	111925	-1.0244	0.0617348	-16.5935	7.76102e-62	1.13932e-59
CPEB4	80315	2217.87	-1.02252	0.0661077	-15.4676	5.74493e-54	6.62637e-52
RAMP1	10267	53.4535	-1.02183	0.216742	-4.71452	2.42286e-06	1.3107e-05
PITPNM3	83394	593.529	-1.01978	0.102613	-9.93806	2.84298e-23	7.82086e-22
CHAC1	79094	404.824	-1.01902	0.103806	-9.81657	9.55348e-23	2.5457e-21
SLC3A2	6520	9291.17	-1.01596	0.074844	-13.5744	5.68335e-42	4.19063e-40
FAM101B	359845	3639.5	-1.01378	0.0647723	-15.6514	3.24835e-55	3.88551e-53
HMOX1	3162	10607.4	-1.01015	0.221335	-4.56388	5.02159e-06	2.58244e-05
TGFB1	7040	7953.59	-1.00449	0.0561799	-17.8799	1.69108e-71	3.03418e-69
LIN7B	64130	56.656	-1.00244	0.211913	-4.73042	2.24055e-06	1.21696e-05
SAT1	6303	4834.58	-1.00142	0.063356	-15.8063	2.81551e-56	3.49729e-54
KDM3A	55818	1293.23	-0.998882	0.0942153	-10.6021	2.913e-26	9.90298e-25
CRYAB	1410	4741.71	-0.987717	0.0645206	-15.3086	6.70296e-53	7.46478e-51
MMP19	4327	5620.52	-0.987646	0.15229	-6.48528	8.85655e-11	8.80638e-10
ZNF432	9668	642.499	-0.986341	0.0864441	-11.4102	3.72055e-30	1.59786e-28
HDAC5	10014	2571.98	-0.986262	0.0661581	-14.9077	2.93914e-50	2.92971e-48
MEDAG	84935	254.684	-0.982137	0.123931	-7.92489	2.28341e-15	3.51837e-14
FLT1	2321	2164.5	-0.976824	0.0616798	-15.837	1.72797e-56	2.16304e-54
SEC14L2	23541	4042.85	-0.973744	0.0831023	-11.7174	1.03796e-31	4.81638e-30
HIST1H2AE	3012	41.3193	-0.971534	0.240548	-4.03883	5.37174e-05	0.000228572
SOX4	6659	403.725	-0.971196	0.106646	-9.10674	8.48925e-20	1.87787e-18
DKK3	27122	6994.96	-0.971126	0.0710836	-13.6618	1.71803e-42	1.30248e-40
TNFAIP3	7128	4880.84	-0.969329	0.141044	-6.87252	6.30775e-12	7.08821e-11
NUDT17	200035	134.297	-0.966377	0.160045	-6.03817	1.5587e-09	1.32543e-08
CREBRF	153222	709.912	-0.964691	0.0956532	-10.0853	6.41651e-24	1.84039e-22
LRRC37B	114659	367.638	-0.963465	0.101487	-9.49345	2.23522e-21	5.46058e-20
ZNF441	126068	376.767	-0.961164	0.108382	-8.86827	7.42881e-19	1.53795e-17
PLEKHN1	84069	304.591	-0.96005	0.1305	-7.3567	1.88515e-13	2.46488e-12
VEGFC	7424	6400.1	-0.959351	0.0547089	-17.5355	7.67176e-69	1.29045e-66
GREM2	64388	3225.78	-0.951658	0.0768107	-12.3897	2.97317e-35	1.60571e-33
CLEC3B	7123	276.048	-0.947461	0.120321	-7.87443	3.42298e-15	5.17549e-14
MAP3K4	4216	3086.6	-0.943866	0.0568593	-16.6	6.96437e-62	1.03175e-59
COL7A1	1294	14028.8	-0.942102	0.13376	-7.04322	1.87852e-12	2.23046e-11
TXNRD1	7296	28937.9	-0.939137	0.149955	-6.2628	3.78131e-10	3.50722e-09
BIRC2	329	6607.05	-0.938361	0.0533394	-17.5923	2.82309e-69	4.79866e-67
KLHL24	54800	388.461	-0.936348	0.101794	-9.19848	3.63044e-20	8.2686e-19
MXD1	4084	488.041	-0.934844	0.0976624	-9.5722	1.04653e-21	2.59989e-20
RLF	6018	1514.41	-0.934414	0.0648784	-14.4025	4.98766e-47	4.37722e-45
SPRY4	81848	9637.41	-0.92982	0.0579571	-16.0433	6.37273e-58	8.5047e-56
SLC19A2	10560	1454.31	-0.92892	0.0647475	-14.3468	1.11555e-46	9.48104e-45
GABRE	2564	445.276	-0.928125	0.10587	-8.76664	1.84085e-18	3.69727e-17
CCRN4L	25819	1277.25	-0.927585	0.0858997	-10.7985	3.49983e-27	1.2559e-25
PRR5L	79899	372.967	-0.925625	0.105417	-8.78064	1.62541e-18	3.30153e-17
FLRT2	23768	3426.04	-0.923225	0.0716148	-12.8916	5.0221e-38	3.03733e-36
CCDC71L	168455	2846.33	-0.923001	0.0580444	-15.9016	6.17223e-57	7.91026e-55
ADAP1	11033	185.981	-0.920053	0.158663	-5.7988	6.67921e-09	5.22051e-08
ZNF582	147948	169.567	-0.918347	0.148545	-6.18227	6.31876e-10	5.69711e-09
GPR68	8111	1059.96	-0.913507	0.0903844	-10.1069	5.14808e-24	1.49786e-22
PLEK2	26499	1049.51	-0.913485	0.0795089	-11.4891	1.49686e-30	6.62226e-29
RBP4	5950	58.3033	-0.912879	0.212157	-4.30284	1.68622e-05	7.89479e-05
AKR1C2	1646	1537.18	-0.911605	0.0715156	-12.7469	3.24231e-37	1.91083e-35
RCAN1	1827	3145.9	-0.90953	0.0509984	-17.8345	3.81453e-71	6.7689e-69
ADAMTS6	11174	2029.64	-0.909216	0.0603694	-15.0609	2.92833e-51	3.05076e-49
FLNC	2318	58352.4	-0.909033	0.0738154	-12.3149	7.52656e-35	3.98488e-33
TRAF1	7185	593.606	-0.908039	0.0885012	-10.2602	1.06491e-24	3.288e-23
HIST1H4H	8365	56.3789	-0.907337	0.232733	-3.89862	9.67435e-05	0.000389765
SCARF2	91179	1314.74	-0.904103	0.0669537	-13.5034	1.49332e-41	1.07174e-39
CCDC80	151887	68507	-0.900362	0.0703576	-12.7969	1.70539e-37	1.01245e-35
UCN2	90226	62.8919	-0.900333	0.210806	-4.27092	1.9467e-05	9.00982e-05
ACOT11	26027	203.991	-0.899078	0.128685	-6.98667	2.81494e-12	3.282e-11
RGL2	5863	1189.46	-0.898122	0.0661828	-13.5703	6.00431e-42	4.40716e-40
GNRH1	2796	64.7577	-0.896521	0.206369	-4.34425	1.39751e-05	6.62953e-05
GET4	51608	1688.45	-0.894526	0.0808877	-11.0589	1.98596e-28	7.67208e-27
ZNF20	7568	218.691	-0.892773	0.140028	-6.37566	1.82173e-10	1.75521e-09
PKP1	5317	489.94	-0.892312	0.114605	-7.78599	6.91716e-15	1.01268e-13
PDPN	10630	193.444	-0.891346	0.143836	-6.19694	5.7571e-10	5.21986e-09
IER3	8870	2202.95	-0.889031	0.0831095	-10.6971	1.05e-26	3.66206e-25
KCNC4	3749	622.676	-0.888955	0.0984441	-9.03004	1.71603e-19	3.73959e-18
ENO2	2026	1792.27	-0.888354	0.22894	-3.88029	0.000104331	0.000417222
SGK1	6446	13408.2	-0.887716	0.0459219	-19.331	2.94773e-83	6.99998e-81
C3orf52	79669	456.144	-0.885516	0.100331	-8.82592	1.08565e-18	2.22759e-17
CXCL2	2920	234.558	-0.885028	0.14316	-6.18209	6.32587e-10	5.70034e-09
KCNS2	3788	133.597	-0.883646	0.16564	-5.33474	9.56815e-08	6.33223e-07
GPAM	57678	2295.49	-0.88355	0.0680055	-12.9923	1.35229e-38	8.39875e-37
HIP1	3092	6127.66	-0.881159	0.0578148	-15.2411	1.8875e-52	2.0456e-50
MPP3	4356	691.722	-0.880993	0.0896144	-9.83093	8.28528e-23	2.22613e-21
POMZP3	22932	249.107	-0.87963	0.142854	-6.15753	7.38895e-10	6.59209e-09
PPP1R3C	5507	817.006	-0.877777	0.0909856	-9.64743	5.04054e-22	1.26981e-20
MAFG	4097	2575.34	-0.876439	0.062195	-14.0918	4.26585e-45	3.46155e-43
TRIB3	57761	1738.46	-0.872888	0.0876064	-9.96374	2.19642e-23	6.08367e-22
RAB31	11031	6309.51	-0.872211	0.0574425	-15.1841	4.50785e-52	4.82071e-50
ZNF461	92283	299.53	-0.871392	0.113798	-7.65735	1.89811e-14	2.67225e-13
GDNF	2668	904.211	-0.868301	0.105446	-8.23454	1.80247e-16	3.05738e-15
FURIN	5045	5503.98	-0.868083	0.0511696	-16.9648	1.49593e-64	2.27889e-62
PDK1	5163	1396.55	-0.866572	0.192504	-4.50158	6.74509e-06	3.39208e-05
FLCN	201163	2270.79	-0.865267	0.0775163	-11.1624	6.22964e-29	2.47774e-27
KDM6A	7403	1700.5	-0.864007	0.067883	-12.7279	4.13875e-37	2.42147e-35
LMCD1	29995	2280.94	-0.861225	0.073458	-11.724	9.59778e-32	4.46642e-30
CDK5R1	8851	443.893	-0.860814	0.106849	-8.05639	7.85792e-16	1.25138e-14
NOTCH3	4854	4866.98	-0.859338	0.0840763	-10.2209	1.59811e-24	4.84171e-23
SLC7A11	23657	1881.63	-0.857239	0.201971	-4.24437	2.19205e-05	0.000100761
VLDLR	7436	443.41	-0.857198	0.131209	-6.53306	6.444e-11	6.47528e-10
STMN2	11075	135.324	-0.856678	0.171957	-4.98193	6.2953e-07	3.72096e-06
OTUD3	23252	894.857	-0.852168	0.0775504	-10.9886	4.33794e-28	1.64821e-26
TBX1	6899	906.452	-0.844313	0.0795743	-10.6104	2.6668e-26	9.12362e-25
SOCS2	8835	837.099	-0.84294	0.0840791	-10.0256	1.17685e-23	3.32816e-22
ZNF222	7673	140.715	-0.84177	0.148716	-5.66025	1.5115e-08	1.12167e-07
PSG9	5678	53.3064	-0.840498	0.22017	-3.8175	0.000134813	0.000527364
SHANK3	85358	1145.42	-0.840283	0.0821014	-10.2347	1.38627e-24	4.23166e-23
MALL	7851	90.1363	-0.839228	0.21195	-3.95956	7.50879e-05	0.000309711
LOC101929959	101929959	35.7539	-0.837595	0.242623	-3.45225	0.000555925	0.0019092
OSGIN2	734	1433.92	-0.835407	0.0643604	-12.9801	1.58593e-38	9.81208e-37
DIXDC1	85458	1588.76	-0.835356	0.0815559	-10.2427	1.27571e-24	3.90895e-23
SAMD1	90378	1070.15	-0.835135	0.0699163	-11.9448	6.91404e-33	3.39356e-31
FOXD1	2297	1853.5	-0.834816	0.0638602	-13.0725	4.72575e-39	3.00439e-37
LOC102723897	102723897	104.884	-0.834023	0.175549	-4.75093	2.02483e-06	1.10912e-05
TBX2	6909	3468.04	-0.832176	0.0587432	-14.1663	1.4801e-45	1.21323e-43
GAL	51083	444.146	-0.832012	0.0969406	-8.5827	9.26683e-18	1.773e-16
KCTD11	147040	662.512	-0.830664	0.0924858	-8.98153	2.67035e-19	5.74945e-18
UBC	7316	42054.7	-0.828588	0.0609787	-13.5882	4.70747e-42	3.50305e-40
CDC14A	8556	293.929	-0.827941	0.11272	-7.3451	2.05603e-13	2.67101e-12
FBLIM1	54751	1541.51	-0.827503	0.0668425	-12.3799	3.35781e-35	1.80139e-33
IL1RL2	8808	323.756	-0.827135	0.118311	-6.99122	2.72511e-12	3.18575e-11
SLC16A3	9123	11895.4	-0.82396	0.0619914	-13.2915	2.59251e-40	1.73709e-38
ZNF211	10520	444.348	-0.823488	0.0971233	-8.47878	2.27565e-17	4.18057e-16
POPDC3	64208	940.736	-0.822982	0.0994879	-8.27219	1.31525e-16	2.24748e-15
IRS2	8660	4761.03	-0.82249	0.0629248	-13.071	4.82299e-39	3.05418e-37
GBP5	115362	239.819	-0.82241	0.127887	-6.43075	1.26977e-10	1.24494e-09
EFS	10278	752.499	-0.821194	0.0871622	-9.42144	4.44936e-21	1.066e-19
PALM2	114299	268.359	-0.820508	0.1167	-7.0309	2.05207e-12	2.42939e-11
TBC1D2	55357	5483.14	-0.819902	0.0811483	-10.1037	5.31698e-24	1.53868e-22
GCA	25801	216.359	-0.818965	0.132041	-6.20235	5.56259e-10	5.0577e-09
ACTN2	88	433.598	-0.818708	0.114492	-7.15081	8.62684e-13	1.05775e-11
IGFBP4	3487	34208.5	-0.817428	0.0506887	-16.1264	1.66341e-58	2.31558e-56
ZNF583	147949	307.552	-0.813755	0.114785	-7.08937	1.34726e-12	1.61992e-11
CRIM1	51232	19112.5	-0.809329	0.05375	-15.0573	3.09136e-51	3.19995e-49
CD7	924	298.774	-0.808462	0.115832	-6.97962	2.95972e-12	3.44334e-11
ANKRD10	55608	1166.57	-0.807636	0.0786985	-10.2624	1.04076e-24	3.21958e-23
DCBLD1	285761	2804	-0.807622	0.0782116	-10.3261	5.36878e-25	1.68996e-23
ADTRP	84830	271.501	-0.804881	0.120281	-6.69166	2.20651e-11	2.32729e-10
HIST2H2BF	440689	23.0516	-0.803849	0.266567	-3.01556	0.00256504	0.00746849
OSGIN1	29948	682.921	-0.80195	0.0978016	-8.19976	2.40864e-16	4.00977e-15
ZSWIM6	57688	1083.4	-0.800673	0.0786299	-10.1828	2.36644e-24	7.08965e-23
FSTL3	10272	4764.78	-0.79869	0.0539699	-14.7988	1.49132e-49	1.44202e-47
KLF7	8609	3049.08	-0.798138	0.0642136	-12.4294	1.80957e-35	9.83871e-34
HBEGF	1839	452.563	-0.795936	0.105026	-7.57847	3.49647e-14	4.8011e-13
NRIP3	56675	1737.65	-0.792985	0.07371	-10.7582	5.42374e-27	1.93339e-25
B3GNT2	10678	1494.25	-0.791705	0.0632688	-12.5133	6.31067e-36	3.4544e-34
HSPB2	3316	219.38	-0.791294	0.130061	-6.08404	1.17195e-09	1.01733e-08
ADAM19	8728	2158.3	-0.790383	0.080994	-9.75854	1.69583e-22	4.4311e-21
NPIPB15	440348	75.2186	-0.787126	0.199429	-3.9469	7.91701e-05	0.000325137
WTIP	126374	693.587	-0.785879	0.0972265	-8.08297	6.32076e-16	1.0156e-14
FRMD4A	55691	5250.38	-0.785049	0.0527322	-14.8875	3.97501e-50	3.91394e-48
KDM6B	23135	986.57	-0.781905	0.0796657	-9.81483	9.72002e-23	2.58581e-21
SPON1	10418	2749.61	-0.779632	0.075251	-10.3604	3.75281e-25	1.18592e-23
TMEM200A	114801	1648.11	-0.779154	0.0724363	-10.7564	5.52853e-27	1.9664e-25
KCNJ15	3772	1329.8	-0.776727	0.106683	-7.2807	3.32081e-13	4.21575e-12
STC2	8614	4768.08	-0.776343	0.0850076	-9.13264	6.68493e-20	1.491e-18
NFKBIA	4792	2067.73	-0.775787	0.0647571	-11.98	4.52546e-33	2.24163e-31
SCUBE3	222663	650.9	-0.77495	0.0964201	-8.03722	9.18994e-16	1.44921e-14
ATG16L2	89849	456.004	-0.774833	0.0978296	-7.92023	2.37071e-15	3.639e-14
SLC25A25	114789	1588.49	-0.772968	0.0799164	-9.6722	3.95773e-22	1.00329e-20
ERN1	2081	410.314	-0.77246	0.118315	-6.52887	6.6268e-11	6.64656e-10
TPST1	8460	2541.58	-0.770632	0.07092	-10.8662	1.66983e-27	6.17034e-26
CSRP2	1466	228.412	-0.769932	0.125421	-6.13879	8.31528e-10	7.35754e-09
PXDC1	221749	2036.01	-0.767559	0.0621777	-12.3446	5.21003e-35	2.76749e-33
BNIP3	664	3405.64	-0.767288	0.233551	-3.28532	0.00101868	0.00328338
HTR7	3363	551.758	-0.766626	0.0880803	-8.70372	3.21178e-18	6.34808e-17
JARID2	3720	2553.93	-0.766253	0.0721524	-10.6199	2.4078e-26	8.25501e-25
WHAMM	123720	950.636	-0.76592	0.0839339	-9.12527	7.15581e-20	1.58944e-18
HSPBAP1	79663	398.751	-0.763813	0.10791	-7.07825	1.45983e-12	1.75007e-11
STXBP2	6813	213.604	-0.763643	0.130637	-5.84552	5.04992e-09	4.00915e-08
DNAJB5	25822	2232.02	-0.760383	0.0582137	-13.0619	5.43282e-39	3.42692e-37
2005-09-01	5413	736.805	-0.759455	0.0844081	-8.99742	2.31093e-19	4.99557e-18
GSTM5	2949	434.024	-0.759104	0.101127	-7.50645	6.07528e-14	8.1753e-13
HDAC9	9734	793.032	-0.758793	0.0982101	-7.72622	1.10785e-14	1.5916e-13
GABBR1	2550	1084.92	-0.757885	0.0829187	-9.14009	6.23975e-20	1.39556e-18
COL5A1	1289	13604.3	-0.752411	0.0821411	-9.15998	5.19063e-20	1.16738e-18
ZNF670	93474	281.529	-0.751946	0.118002	-6.37231	1.86205e-10	1.79298e-09
RUSC2	9853	4159.93	-0.751484	0.0595962	-12.6096	1.8693e-36	1.05914e-34
THUMPD2	80745	729.693	-0.749902	0.0913482	-8.20926	2.22547e-16	3.7279e-15
PIR	8544	154.09	-0.748165	0.156567	-4.77855	1.76567e-06	9.7577e-06
THBS1	7057	77811.1	-0.747793	0.0665444	-11.2375	2.66835e-29	1.09085e-27
DLG4	1742	996.062	-0.745816	0.0745207	-10.0082	1.40307e-23	3.94032e-22
ETS1	2113	8386.45	-0.745579	0.0507868	-14.6806	8.5856e-49	7.87729e-47
PTBP2	58155	530.706	-0.74483	0.0898859	-8.28639	1.1674e-16	2.00758e-15
FZD7	8324	1585.47	-0.744224	0.0722254	-10.3042	6.7468e-25	2.10323e-23
IRAK2	3656	441.556	-0.743786	0.0985804	-7.54497	4.52403e-14	6.15451e-13
DUSP1	1843	10366.1	-0.743559	0.0590945	-12.5825	2.63407e-36	1.47691e-34
TIPARP	25976	12932.8	-0.743518	0.0486029	-15.2978	7.90904e-53	8.74761e-51
DNAJA4	55466	778.553	-0.7435	0.0832981	-8.92577	4.42627e-19	9.36767e-18
ALCAM	214	16910	-0.743012	0.0578778	-12.8376	1.00967e-37	6.06101e-36
DAW1	164781	148.16	-0.741961	0.158666	-4.67624	2.92188e-06	1.55821e-05
MCOLN1	57192	1100.43	-0.74025	0.0851024	-8.69834	3.3677e-18	6.64811e-17
PLXNA2	5362	7540.99	-0.739951	0.0486774	-15.2011	3.47638e-52	3.74244e-50
ELL2	22936	13511.8	-0.739844	0.0488257	-15.1527	7.26618e-52	7.71936e-50
PDK3	5165	434.264	-0.738056	0.141674	-5.20952	1.89332e-07	1.21083e-06
P4HA3	283208	813.877	-0.737842	0.0869305	-8.48773	2.10719e-17	3.87992e-16
TRIM16L	147166	819.917	-0.737088	0.209797	-3.51335	0.0004425	0.00155067
GOLGA8B	440270	528.978	-0.736448	0.0860265	-8.56071	1.12175e-17	2.12196e-16
TNFRSF12A	51330	8510.07	-0.735659	0.0649809	-11.3212	1.03107e-29	4.29118e-28
CEACAM19	56971	171.733	-0.734937	0.147901	-4.9691	6.72632e-07	3.95567e-06
SLC9A3R2	9351	2119.76	-0.734476	0.0598964	-12.2624	1.44091e-34	7.50574e-33
GCLC	2729	1130.48	-0.73353	0.104956	-6.98895	2.76948e-12	3.23133e-11
HOMER2	9455	514.686	-0.733279	0.0929883	-7.88571	3.12743e-15	4.75534e-14
NFKB2	4791	1838.58	-0.73291	0.0926111	-7.91385	2.49553e-15	3.82333e-14
C5AR2	27202	48.3604	-0.731126	0.227024	-3.22048	0.00127977	0.00401744
MED26	9441	690.469	-0.730518	0.102551	-7.12345	1.05255e-12	1.28083e-11
C19orf26	255057	277.864	-0.729	0.126169	-5.77795	7.56183e-09	5.8706e-08
GLIS3	169792	1623.71	-0.728701	0.0702763	-10.3691	3.42827e-25	1.08548e-23
HELQ	113510	660.516	-0.727756	0.0894888	-8.13236	4.20997e-16	6.89182e-15
ZNF79	7633	800.405	-0.723886	0.0999374	-7.24339	4.37599e-13	5.48629e-12
POLG2	11232	707.436	-0.723861	0.0897048	-8.06937	7.06629e-16	1.12977e-14
ZNF654	55279	1097.62	-0.7229	0.0731075	-9.88818	4.68467e-23	1.2714e-21
PLEKHO1	51177	1531.24	-0.722413	0.062367	-11.5833	5.01034e-31	2.2663e-29
CXCL5	6374	1184.43	-0.720276	0.0702439	-10.2539	1.13627e-24	3.48831e-23
ZBTB5	9925	460.775	-0.719098	0.106397	-6.75865	1.39285e-11	1.50648e-10
PF4	5196	42.1126	-0.718775	0.232471	-3.09189	0.00198884	0.00594956
SS18L1	26039	754.445	-0.717348	0.0805332	-8.90748	5.22057e-19	1.09625e-17
CRIP2	1397	1932.7	-0.71729	0.0744331	-9.63671	5.59515e-22	1.40514e-20
PRH1	5554	61.2615	-0.715679	0.20534	-3.48533	0.000491522	0.00170582
SDCBP2	27111	240.726	-0.715506	0.124082	-5.7664	8.09843e-09	6.2631e-08
GDPD3	79153	116.335	-0.714674	0.177613	-4.02377	5.72749e-05	0.000242558
SESN2	83667	2319.49	-0.713105	0.0808381	-8.8214	1.13037e-18	2.31052e-17
ZNF841	284371	818.271	-0.71286	0.0832387	-8.56405	1.08974e-17	2.07026e-16
B3GNT9	84752	684.695	-0.710975	0.0884194	-8.04094	8.91527e-16	1.40865e-14
CTH	1491	225.901	-0.710598	0.128188	-5.54339	2.96677e-08	2.11699e-07
KANSL1L	151050	286.784	-0.707826	0.11544	-6.13156	8.70207e-10	7.67036e-09
ADARB1	104	2513.53	-0.706922	0.0593228	-11.9165	9.70769e-33	4.6794e-31
PSG5	5673	318.254	-0.705657	0.117309	-6.01535	1.79493e-09	1.51831e-08
KCNK1	3775	291.288	-0.705329	0.115874	-6.08702	1.15034e-09	9.99768e-09
CSF1R	1436	154.395	-0.70131	0.151756	-4.62129	3.8137e-06	1.99817e-05
ATP1B1	481	1154.18	-0.700398	0.0722042	-9.70024	3.00805e-22	7.69793e-21
CEMIP	57214	2879.55	-0.698302	0.0581234	-12.0141	2.99478e-33	1.50185e-31
ZMYM5	9205	569.642	-0.698295	0.0887114	-7.87154	3.50299e-15	5.28163e-14
HS3ST3A1	9955	5343.1	-0.697772	0.0531169	-13.1365	2.03319e-39	1.30285e-37
MTRNR2L9	100463487	805.118	-0.695765	0.23592	-2.94916	0.00318643	0.00903028
TGFB1I1	7041	2404.38	-0.695549	0.0577735	-12.0393	2.20947e-33	1.11495e-31
NFIL3	4783	1872.79	-0.693958	0.0676519	-10.2578	1.09194e-24	3.365e-23
TSPYL2	64061	1069.27	-0.693502	0.0742251	-9.34324	9.34344e-21	2.18664e-19
DNM1	1759	1532.44	-0.693329	0.082857	-8.36777	5.87184e-17	1.03854e-15
GORAB	92344	883.168	-0.692522	0.0726088	-9.53771	1.46014e-21	3.57249e-20
MTRNR2L6	100463482	480.316	-0.692334	0.218674	-3.16606	0.00154521	0.00474553
LRRC15	131578	8355.69	-0.691966	0.0752701	-9.1931	3.81677e-20	8.65636e-19
STX3	6809	1607.07	-0.691788	0.0589741	-11.7304	8.9068e-32	4.1689e-30
AK4	205	1353.6	-0.690583	0.218052	-3.16706	0.00153987	0.00473185
RUNX1	861	3664.11	-0.689456	0.0541746	-12.7266	4.20954e-37	2.45399e-35
PCF11	51585	2744.63	-0.689271	0.0694935	-9.91849	3.45954e-23	9.48466e-22
ST3GAL1	6482	2554.91	-0.688384	0.0681298	-10.104	5.30306e-24	1.53741e-22
AKAP8L	26993	1953.76	-0.688038	0.0702137	-9.79921	1.13472e-22	2.99892e-21
SLC1A1	6505	286.823	-0.687687	0.152901	-4.4976	6.87239e-06	3.4518e-05
SLC20A1	6574	32918.4	-0.686636	0.0492308	-13.9473	3.26744e-44	2.57379e-42
GPX3	2878	135.27	-0.685045	0.168705	-4.06062	4.89432e-05	0.000210084
FRMD6	122786	15348.2	-0.685037	0.0481132	-14.238	5.32211e-46	4.42997e-44
FICD	11153	634.729	-0.684142	0.0912962	-7.49365	6.69851e-14	8.98401e-13
NAB2	4665	3106.47	-0.681341	0.0541184	-12.5898	2.40222e-36	1.35633e-34
RASA4B	100271927	22.1033	-0.681319	0.2674	-2.54794	0.010836	0.026629
PRSS3	5646	621.542	-0.681307	0.0847845	-8.03574	9.30136e-16	1.46535e-14
TOM1	10043	1579.91	-0.680894	0.0667254	-10.2044	1.89462e-24	5.71856e-23
ZNF23	7571	760.122	-0.679308	0.0811199	-8.37412	5.56384e-17	9.86224e-16
CHD2	1106	5413.2	-0.677482	0.0463749	-14.6088	2.4679e-48	2.23886e-46
AGAP4	119016	109.689	-0.677108	0.166883	-4.05739	4.9625e-05	0.000212727
GLI2	2736	700.623	-0.677022	0.0876622	-7.72309	1.13546e-14	1.62981e-13
CAPN3	825	296.148	-0.673954	0.114506	-5.88575	3.9626e-09	3.19143e-08
NQO1	1728	11184.5	-0.673496	0.135385	-4.97466	6.53614e-07	3.85484e-06
PPM1D	8493	1078	-0.673351	0.071966	-9.35651	8.24151e-21	1.93436e-19
ZNF155	7711	343.783	-0.672643	0.102471	-6.56425	5.22943e-11	5.30099e-10
FOXF1	2294	1166.31	-0.672295	0.0661703	-10.1601	2.98891e-24	8.85594e-23
ALDOC	230	961.179	-0.672022	0.194302	-3.45864	0.000542907	0.00186847
GPCPD1	56261	975.367	-0.671552	0.0779097	-8.61962	6.71766e-18	1.30068e-16
GTPBP2	54676	2609.85	-0.669723	0.0561976	-11.9173	9.6185e-33	4.65029e-31
KIAA0355	9710	767.663	-0.669231	0.0813943	-8.22209	1.99994e-16	3.37109e-15
DUSP16	80824	598.407	-0.669004	0.0990187	-6.75634	1.41518e-11	1.52654e-10
PLOD2	5352	9473.04	-0.668539	0.174968	-3.82092	0.000132954	0.000520974
ZNF721	170960	1009.54	-0.668225	0.0690554	-9.67665	3.78926e-22	9.65125e-21
ZNF773	374928	276.003	-0.667803	0.120523	-5.5409	3.00922e-08	2.14633e-07
SSTR1	6751	1035.51	-0.66668	0.0771178	-8.64495	5.3829e-18	1.04853e-16
ZNF121	7675	353.452	-0.665972	0.117672	-5.65956	1.51766e-08	1.12573e-07
ZNF503	84858	796.049	-0.665817	0.0774904	-8.59226	8.5276e-18	1.63933e-16
SPRYD3	84926	4429.69	-0.665601	0.0486557	-13.6798	1.34068e-42	1.02119e-40
RGS20	8601	877.28	-0.66547	0.0749432	-8.87966	6.70647e-19	1.39377e-17
BIN1	274	2041.03	-0.664509	0.0624085	-10.6477	1.78662e-26	6.15147e-25
SMURF2	64750	5098.6	-0.662767	0.0547093	-12.1143	8.86662e-34	4.54534e-32
DOK4	55715	1796.85	-0.662738	0.0615441	-10.7685	4.84754e-27	1.73181e-25
ACADVL	37	11395.2	-0.660402	0.0533344	-12.3823	3.25937e-35	1.75441e-33
PPP3CC	5533	1174.84	-0.660299	0.0736567	-8.96454	3.11577e-19	6.65522e-18
ZBTB48	3104	395.046	-0.660205	0.104787	-6.30046	2.96771e-10	2.78458e-09
ZNF317	57693	2054.54	-0.659546	0.0602292	-10.9506	6.6007e-28	2.46732e-26
RND3	390	16416.7	-0.659505	0.0775663	-8.50247	1.85598e-17	3.43303e-16
MAPK8	5599	1481.26	-0.659454	0.0648018	-10.1765	2.52554e-24	7.55229e-23
RAPH1	65059	4784.32	-0.659366	0.0536747	-12.2845	1.09731e-34	5.77177e-33
PSG4	5672	598.512	-0.659161	0.121707	-5.41595	6.09635e-08	4.15375e-07
HTRA1	5654	12365.9	-0.657377	0.0726789	-9.04494	1.49743e-19	3.2854e-18
PLCB4	5332	8504.05	-0.657359	0.0604389	-10.8764	1.4931e-27	5.54265e-26
ZCCHC14	23174	2360.79	-0.657193	0.0555439	-11.832	2.66805e-32	1.27467e-30
ICAM1	3383	307.707	-0.656841	0.116963	-5.61582	1.95637e-08	1.42561e-07
ARHGAP31	57514	1773.82	-0.655417	0.0710618	-9.22319	2.88386e-20	6.58679e-19
BANP	54971	626.456	-0.65465	0.100049	-6.54327	6.01861e-11	6.07428e-10
LOC102724594	102724594	19.443	-0.651793	0.276598	-2.35646	0.01845	0.0424705
AP5Z1	9907	2214.87	-0.651647	0.0778105	-8.37479	5.53202e-17	9.8166e-16
LOX	4015	64921.3	-0.650998	0.0622104	-10.4645	1.25799e-25	4.12048e-24
ZNF333	84449	425.463	-0.649904	0.10713	-6.06651	1.30722e-09	1.12521e-08
TBKBP1	9755	1502.42	-0.649345	0.0779462	-8.33069	8.03752e-17	1.40011e-15
ANGPT1	284	580.245	-0.648311	0.0964791	-6.71971	1.82089e-11	1.93828e-10
AEBP1	165	15680	-0.647357	0.0472034	-13.7142	8.34791e-43	6.41915e-41
AJAP1	55966	1234.05	-0.645262	0.0813597	-7.93098	2.17421e-15	3.35973e-14
ZNF274	10782	1429.48	-0.645035	0.0620688	-10.3922	2.68945e-25	8.58287e-24
EPC1	80314	1173.49	-0.644656	0.0700113	-9.20788	3.3264e-20	7.58683e-19
ADGRE2	30817	597.416	-0.643848	0.0828553	-7.77075	7.80226e-15	1.13608e-13
FZD8	8325	618.894	-0.643371	0.0964445	-6.67089	2.5425e-11	2.66253e-10
LIMK2	3985	942.28	-0.643315	0.0767535	-8.38157	5.22256e-17	9.29811e-16
ZNF202	7753	873.178	-0.641624	0.0770598	-8.32631	8.34045e-17	1.45131e-15
FHOD3	80206	1110.35	-0.639992	0.0732638	-8.73545	2.42681e-18	4.81427e-17
SHB	6461	1203.06	-0.639053	0.0816703	-7.82478	5.08529e-15	7.54061e-14
ADRB2	154	346.011	-0.63815	0.10405	-6.13312	8.61722e-10	7.60387e-09
IL13RA2	3598	4143.72	-0.638087	0.0665503	-9.58804	8.97781e-22	2.23725e-20
TSC22D2	9819	2529.17	-0.636834	0.0675842	-9.42282	4.39119e-21	1.05363e-19
ISLR	3671	714.372	-0.636636	0.0809902	-7.86065	3.82138e-15	5.73492e-14
KLHL26	55295	299.621	-0.636449	0.111782	-5.69366	1.24347e-08	9.35239e-08
UPP1	7378	2092.96	-0.635848	0.074626	-8.52046	1.58914e-17	2.94621e-16
SH3RF1	57630	3002.64	-0.635498	0.0640543	-9.92124	3.36559e-23	9.24279e-22
TSC22D3	1831	1411.52	-0.635077	0.0853029	-7.44496	9.69732e-14	1.29095e-12
YOD1	55432	1054.9	-0.634765	0.0801201	-7.92268	2.32452e-15	3.57489e-14
NFKBIZ	64332	963.584	-0.6339	0.0836254	-7.58024	3.44928e-14	4.74437e-13
ZNF256	10172	205.711	-0.633191	0.139088	-4.55243	5.30289e-06	2.71758e-05
ZNF550	162972	609.309	-0.633078	0.0841578	-7.52251	5.37348e-14	7.27334e-13
DIRAS1	148252	1187.64	-0.632111	0.0687322	-9.19673	3.68996e-20	8.38212e-19
FAM174A	345757	310.943	-0.631804	0.123625	-5.11064	3.21071e-07	1.98722e-06
ZHX2	22882	342.655	-0.630069	0.104521	-6.02813	1.65865e-09	1.40592e-08
CCDC84	338657	298.265	-0.628478	0.111668	-5.62811	1.82196e-08	1.33489e-07
EPHA2	1969	1177.81	-0.628469	0.0860689	-7.30193	2.83662e-13	3.6325e-12
ZNF93	81931	252.99	-0.627394	0.124019	-5.05884	4.21825e-07	2.56365e-06
CRADD	8738	753.892	-0.625302	0.102142	-6.12191	9.24593e-10	8.12756e-09
SALL1	6299	1457.68	-0.625061	0.0616581	-10.1375	3.76512e-24	1.10343e-22
KITLG	4254	5884.27	-0.625043	0.0540711	-11.5597	6.59755e-31	2.95937e-29
CHMP1B	57132	1596.43	-0.624752	0.0622093	-10.0427	9.8888e-24	2.8064e-22
AMOTL2	51421	6403.93	-0.624602	0.0746882	-8.3628	6.12464e-17	1.07853e-15
NR4A1	3164	356.732	-0.623589	0.107356	-5.80859	6.30013e-09	4.93138e-08
NAV2	89797	8307.38	-0.623452	0.0568045	-10.9754	5.01882e-28	1.89798e-26
ZNF350	59348	276.828	-0.623235	0.114786	-5.42952	5.65049e-08	3.86792e-07
GPX7	2882	334.087	-0.623123	0.109408	-5.6954	1.23081e-08	9.26578e-08
CCDC142	84865	602.744	-0.623009	0.0851173	-7.31942	2.49053e-13	3.2148e-12
NOL3	8996	423.869	-0.622819	0.0993759	-6.2673	3.67364e-10	3.41323e-09
ABHD5	51099	3755.9	-0.621773	0.0644094	-9.65345	4.75293e-22	1.19922e-20
MAPK8IP3	23162	2584.59	-0.620019	0.0628331	-9.86772	5.74584e-23	1.55417e-21
FAM196B	100131897	4941.16	-0.619988	0.0622233	-9.96392	2.19236e-23	6.08287e-22
POTEE	445582	279.05	-0.618395	0.144209	-4.28818	1.80145e-05	8.38806e-05
PTPRF	5792	6656.33	-0.61794	0.0465359	-13.2788	3.07309e-40	2.04215e-38
SERPINE1	5054	380448	-0.617358	0.0517937	-11.9195	9.36225e-33	4.53999e-31
LIMD2	80774	354.012	-0.615683	0.105071	-5.8597	4.63702e-09	3.69771e-08
CLASRP	11129	1295.93	-0.615656	0.09311	-6.61213	3.78816e-11	3.89626e-10
FOXO1	2308	1134.45	-0.615645	0.0682523	-9.02014	1.87854e-19	4.08273e-18
RYBP	23429	3579.56	-0.615037	0.055345	-11.1128	1.08722e-28	4.27654e-27
LINS	55180	572.282	-0.614086	0.0848528	-7.23708	4.58452e-13	5.72994e-12
ZNF296	162979	152.481	-0.611324	0.146795	-4.16449	3.12056e-05	0.000139509
SNX16	64089	678.385	-0.610517	0.0905954	-6.73894	1.59545e-11	1.71185e-10
RIOK3	8780	3666.26	-0.610001	0.054493	-11.1941	4.35659e-29	1.75437e-27
EVA1A	84141	1495.84	-0.609716	0.0625547	-9.74693	1.90133e-22	4.95204e-21
ZNF415	55786	237.636	-0.609394	0.122106	-4.99071	6.01579e-07	3.56619e-06
CTGF	1490	3315.42	-0.607783	0.0621567	-9.77825	1.3961e-22	3.67169e-21
SPRY2	10253	8631.68	-0.606456	0.0603312	-10.0521	8.99239e-24	2.56101e-22
SLC6A8	6535	3981.47	-0.604997	0.0519884	-11.6372	2.6677e-31	1.21689e-29
CRELD1	78987	353.731	-0.60466	0.125789	-4.80693	1.53262e-06	8.54289e-06
COL4A1	1282	11421.8	-0.604646	0.064434	-9.38396	6.35392e-21	1.50665e-19
NECAB3	63941	554.565	-0.603506	0.087758	-6.87693	6.11552e-12	6.88177e-11
KCNG1	3755	614.358	-0.603431	0.094998	-6.35204	2.12472e-10	2.02898e-09
ZNF789	285989	299.712	-0.603267	0.118087	-5.10865	3.2447e-07	2.00518e-06
PTPDC1	138639	915.934	-0.603266	0.0737298	-8.18212	2.78884e-16	4.62363e-15
ABCC9	10060	778.045	-0.602193	0.115293	-5.22314	1.75917e-07	1.12771e-06
ZNF281	23528	3068.79	-0.601471	0.0740893	-8.11819	4.732e-16	7.71063e-15
ARID4B	51742	1738.95	-0.601228	0.0601035	-10.0032	1.47549e-23	4.1365e-22
ZBTB17	7709	1376.74	-0.600881	0.0825068	-7.28281	3.26942e-13	4.16361e-12
HIVEP2	3097	2349.84	-0.600647	0.0627504	-9.572	1.04857e-21	2.60097e-20
ZNF408	79797	537.75	-0.600625	0.0976174	-6.15285	7.61016e-10	6.78195e-09
MLF1	4291	280.85	-0.600335	0.127382	-4.71289	2.44234e-06	1.32035e-05
FGF2	2247	11511.8	-0.600122	0.0528129	-11.3632	6.37925e-30	2.70373e-28
MICAL2	9645	15187.7	-0.599591	0.0517376	-11.5891	4.68219e-31	2.12382e-29
POFUT2	23275	2780.62	-0.599291	0.0566497	-10.5789	3.73382e-26	1.25612e-24
GNB3	2784	201.904	-0.598527	0.137952	-4.33866	1.43354e-05	6.79049e-05
E2F7	144455	2812.24	-0.598344	0.0681935	-8.77421	1.72114e-18	3.46978e-17
AGMAT	79814	202.317	-0.597996	0.132551	-4.51144	6.43896e-06	3.25129e-05
FBLN7	129804	260.686	-0.596983	0.118106	-5.05462	4.31254e-07	2.61604e-06
IL1R2	7850	216.545	-0.596814	0.143508	-4.15876	3.1998e-05	0.000142736
DTX3	196403	622.702	-0.59668	0.0862848	-6.91524	4.67071e-12	5.3227e-11
RNF175	285533	913.82	-0.595903	0.0928161	-6.42026	1.36043e-10	1.32578e-09
CLK4	57396	618.547	-0.595735	0.0834435	-7.13938	9.37498e-13	1.146e-11
ZNF212	7988	532.249	-0.595593	0.0963977	-6.1785	6.47147e-10	5.82829e-09
SHROOM3	57619	2082.38	-0.595587	0.087424	-6.81262	9.58344e-12	1.05131e-10
CCDC9	26093	811.712	-0.594289	0.0875048	-6.79151	1.10966e-11	1.20992e-10
NCK2	8440	1763.82	-0.593757	0.0600351	-9.89015	4.59346e-23	1.24874e-21
DEPDC7	91614	563.123	-0.592202	0.0957716	-6.18348	6.27029e-10	5.65973e-09
CSGALNACT2	55454	3508.03	-0.591936	0.0574483	-10.3038	6.77301e-25	2.10733e-23
ZNF330	27309	2045.31	-0.590421	0.0600826	-9.82682	8.62975e-23	2.31484e-21
CBWD6	644019	61.0343	-0.589181	0.205306	-2.86977	0.00410771	0.0113116
GPRC5A	9052	228.911	-0.588441	0.147474	-3.99015	6.60327e-05	0.000275506
ZNF615	284370	328.081	-0.588048	0.105196	-5.59001	2.27051e-08	1.63899e-07
PLIN2	123	11762.9	-0.5863	0.0653766	-8.96804	3.01841e-19	6.46437e-18
NFKBIE	4794	602.857	-0.586032	0.107424	-5.45533	4.88827e-08	3.38345e-07
NFKBIB	4793	1136.5	-0.585496	0.100878	-5.80398	6.47581e-09	5.06399e-08
LATS2	26524	2968.29	-0.585192	0.0546478	-10.7084	9.29332e-27	3.25528e-25
ZC3HAV1	56829	12640.9	-0.584019	0.0657806	-8.87829	6.78966e-19	1.40925e-17
LCE1F	353137	59.0868	-0.58293	0.219436	-2.65649	0.00789586	0.0202577
ANKHD1	54882	162.688	-0.582606	0.144574	-4.02981	5.58209e-05	0.000236773
TFPI2	7980	82188.3	-0.581347	0.0510817	-11.3807	5.21577e-30	2.22228e-28
SERTAD2	9792	3642.42	-0.581211	0.0552768	-10.5145	7.40347e-26	2.44982e-24
DUSP5	1847	8514.92	-0.581096	0.059671	-9.73833	2.06921e-22	5.36333e-21
RELT	84957	537.759	-0.58069	0.0949533	-6.11553	9.62337e-10	8.43181e-09
LRRC3	81543	288.077	-0.579529	0.118763	-4.87972	1.06239e-06	6.04277e-06
RNF103	7844	793.531	-0.579344	0.0836629	-6.92475	4.36761e-12	4.99845e-11
CTU1	90353	188.752	-0.579323	0.135653	-4.27062	1.94931e-05	9.01931e-05
ADPRM	56985	286.45	-0.578113	0.125738	-4.59775	4.27086e-06	2.21969e-05
LRP5L	91355	145.971	-0.576725	0.14917	-3.86624	0.000110528	0.000440041
ZNF536	9745	886.703	-0.576173	0.0836042	-6.89168	5.51377e-12	6.23504e-11
TCEAL7	56849	348.995	-0.575871	0.118023	-4.87932	1.06451e-06	6.05269e-06
PSG2	5670	54.375	-0.575343	0.233716	-2.46172	0.0138273	0.0329911
BAIAP2L1	55971	148.951	-0.573992	0.144794	-3.96419	7.36466e-05	0.000304388
RHBDF2	79651	800.814	-0.573905	0.0823627	-6.96802	3.21443e-12	3.72091e-11
SYNE1	23345	2397.25	-0.572325	0.0675342	-8.4746	2.35894e-17	4.31883e-16
THAP2	83591	287.07	-0.572087	0.117126	-4.88439	1.03751e-06	5.91167e-06
KCMF1	56888	2828.03	-0.571465	0.0507739	-11.2551	2.18609e-29	9.00535e-28
ZNF316	100131017	1214.87	-0.569878	0.0744041	-7.65923	1.87053e-14	2.64032e-13
HS3ST3B1	9953	3468.94	-0.569102	0.0715422	-7.95477	1.79467e-15	2.78122e-14
CNTN3	5067	1507.62	-0.568933	0.0898931	-6.329	2.46756e-10	2.34251e-09
F3	2152	7321.16	-0.568895	0.160459	-3.54542	0.000391992	0.00138844
ARHGAP26	23092	558.997	-0.568831	0.0927602	-6.13227	8.66325e-10	7.64032e-09
ZNF692	55657	1330.25	-0.568312	0.0793944	-7.15809	8.18068e-13	1.00777e-11
TRPC1	7220	700.046	-0.568096	0.0781289	-7.27126	3.56141e-13	4.49997e-12
RBBP6	5930	4288.53	-0.567955	0.0714362	-7.95051	1.85745e-15	2.87575e-14
C16orf87	388272	306.253	-0.56781	0.114936	-4.94023	7.80293e-07	4.54224e-06
STYXL1	51657	589.578	-0.567371	0.0922867	-6.14792	7.85081e-10	6.97715e-09
KDM5B	10765	2680.78	-0.567078	0.0660845	-8.5811	9.397e-18	1.79365e-16
THAP1	55145	850.548	-0.566848	0.0745323	-7.6054	2.8403e-14	3.93355e-13
SLC4A7	9497	4750.53	-0.565383	0.0598678	-9.44387	3.59274e-21	8.69798e-20
NPIPB5	100132247	116.161	-0.565229	0.162824	-3.47141	0.000517726	0.00179135
SDE2	163859	1648.8	-0.564225	0.0716051	-7.87967	3.28238e-15	4.97689e-14
ZCCHC8	55596	1200.13	-0.561195	0.0801742	-6.9997	2.56512e-12	3.01029e-11
ZNF600	162966	319.751	-0.56051	0.109117	-5.1368	2.79459e-07	1.74776e-06
UGCG	7357	3891.7	-0.559886	0.059821	-9.35936	8.02198e-21	1.88557e-19
TRNP1	388610	26828.4	-0.557589	0.0487688	-11.4333	2.85057e-30	1.23078e-28
P4HA1	5033	5227.42	-0.557584	0.204169	-2.73099	0.00631439	0.0166392
ZNF416	55659	290.815	-0.556773	0.113538	-4.90387	9.39686e-07	5.3866e-06
EIF4A2	1974	9187.25	-0.555931	0.0490822	-11.3265	9.69775e-30	4.06751e-28
FHL3	2275	1070.19	-0.5548	0.0777276	-7.13774	9.48774e-13	1.15804e-11
KIAA0907	22889	1694.59	-0.554539	0.0722483	-7.67546	1.64827e-14	2.33681e-13
ANTXR1	84168	10552.1	-0.554255	0.0613328	-9.03684	1.61271e-19	3.52872e-18
GBGT1	26301	151.271	-0.552609	0.1446	-3.82164	0.000132564	0.000519635
ITGB5	3693	8129.48	-0.552306	0.0482718	-11.4416	2.59103e-30	1.12473e-28
MRAS	22808	3835.71	-0.551278	0.0496803	-11.0965	1.30434e-28	5.11224e-27
IER2	9592	3174.56	-0.551105	0.0846518	-6.51026	7.50193e-11	7.4871e-10
CCDC130	81576	921.757	-0.550263	0.0817034	-6.73489	1.64058e-11	1.75794e-10
ESM1	11082	631.405	-0.550221	0.205357	-2.67934	0.00737678	0.0190959
ZNF134	7693	717.833	-0.549573	0.0859705	-6.39258	1.63113e-10	1.57515e-09
SPON2	10417	7046.79	-0.548696	0.0752122	-7.29531	2.9797e-13	3.8127e-12
LETM2	137994	572.302	-0.548682	0.0834623	-6.574	4.89802e-11	4.98696e-10
CYTH3	9265	3471.84	-0.547051	0.0523283	-10.4542	1.40157e-25	4.57223e-24
FNIP2	57600	1547.27	-0.546996	0.0689741	-7.93046	2.18343e-15	3.37074e-14
LIME1	54923	142.925	-0.545854	0.153662	-3.55229	0.000381894	0.00135777
LOC730268	730268	109.498	-0.5448	0.162551	-3.35156	0.000803582	0.00264767
CITED2	10370	7986.38	-0.544024	0.0593211	-9.17083	4.69386e-20	1.05861e-18
EFNB2	1948	2522.17	-0.544009	0.0772679	-7.04056	1.91475e-12	2.27181e-11
UBAP1	51271	2677.15	-0.543588	0.0665948	-8.16262	3.2784e-16	5.39777e-15
SNX9	51429	5557.34	-0.543208	0.0619035	-8.77508	1.7078e-18	3.4472e-17
LRRC49	54839	412.439	-0.542018	0.104868	-5.16856	2.35899e-07	1.48784e-06
SLC26A6	65010	1723.03	-0.541688	0.0742746	-7.29305	3.03023e-13	3.87428e-12
S1PR3	1903	7438.48	-0.541457	0.0456655	-11.857	1.97881e-32	9.51005e-31
ZNF189	7743	636.421	-0.541028	0.0850687	-6.35989	2.01898e-10	1.93372e-09
UAP1	6675	11258.4	-0.540881	0.0559076	-9.67454	3.86838e-22	9.83727e-21
PRPF39	55015	1385.93	-0.540788	0.0631458	-8.56412	1.08903e-17	2.07026e-16
ULBP1	80329	497.004	-0.540115	0.0952855	-5.66838	1.4415e-08	1.07269e-07
LEMD2	221496	1585.47	-0.539938	0.058894	-9.16796	4.82051e-20	1.08566e-18
MLPH	79083	3929.2	-0.539805	0.0487845	-11.0651	1.85271e-28	7.17449e-27
MAP2	4133	672.167	-0.539803	0.0930999	-5.79811	6.70675e-09	5.23697e-08
ZNF585A	199704	554.114	-0.539704	0.0875991	-6.16107	7.22528e-10	6.44963e-09
GSTM3	2947	1641.64	-0.539601	0.0699625	-7.71272	1.23164e-14	1.76316e-13
ZNF506	440515	381.98	-0.539408	0.10607	-5.08538	3.66883e-07	2.25092e-06
ITPKC	80271	1603.66	-0.539238	0.062632	-8.60962	7.33016e-18	1.41082e-16
LOC105369154	105369154	179.17	-0.538985	0.142755	-3.77559	0.000159627	0.000616221
SLC38A4	55089	372.495	-0.538544	0.110722	-4.86391	1.15088e-06	6.50261e-06
FGF7	2252	2659.77	-0.538367	0.0517981	-10.3936	2.65266e-25	8.4822e-24
CDIP1	29965	1127.23	-0.538048	0.0714771	-7.52756	5.16976e-14	7.00346e-13
GSE1	23199	3005.76	-0.537807	0.0595863	-9.02568	1.78588e-19	3.88657e-18
ELL	8178	1231.47	-0.53733	0.0690702	-7.77947	7.28279e-15	1.06428e-13
LOC100996724	100996724	805.238	-0.537204	0.075009	-7.16186	7.95907e-13	9.82592e-12
YTHDC1	91746	3104.4	-0.536663	0.0628721	-8.53579	1.39199e-17	2.60462e-16
CLK2	1196	1229.84	-0.535855	0.0709943	-7.54786	4.42474e-14	6.02959e-13
ASPHD1	253982	562.442	-0.535801	0.0888846	-6.02805	1.65945e-09	1.40592e-08
ZNF16	7564	266.247	-0.535131	0.12023	-4.45091	8.55073e-06	4.22126e-05
ZNF251	90987	501.049	-0.534668	0.0909133	-5.88108	4.07595e-09	3.27618e-08
GTF2IRD1	9569	769.614	-0.533996	0.0777245	-6.87037	6.40367e-12	7.18599e-11
ESYT3	83850	460.03	-0.532707	0.100688	-5.29068	1.21865e-07	7.95425e-07
PSCA	8000	351.617	-0.532676	0.116053	-4.58995	4.43356e-06	2.29907e-05
RRNAD1	51093	457.067	-0.53125	0.0932165	-5.69909	1.20446e-08	9.0783e-08
LRIF1	55791	1334.78	-0.530661	0.0655413	-8.09659	5.65225e-16	9.17312e-15
ARHGAP32	9743	1266.5	-0.530499	0.0746389	-7.10754	1.18129e-12	1.42887e-11
ETV3	2117	1591.91	-0.530225	0.0659392	-8.04113	8.90145e-16	1.40784e-14
TIMM23B	100652748	572.068	-0.529912	0.087182	-6.07822	1.21523e-09	1.0522e-08
SPDL1	54908	4368.54	-0.529817	0.0528854	-10.0182	1.26795e-23	3.57326e-22
AFAP1L1	134265	1409.41	-0.529778	0.0720655	-7.35134	1.96229e-13	2.55953e-12
LRRC8A	56262	5340.16	-0.529756	0.051011	-10.3851	2.89743e-25	9.21018e-24
ADAMTS2	9509	5410.12	-0.529612	0.0478111	-11.0772	1.61872e-28	6.31378e-27
DGKD	8527	1527.33	-0.529419	0.0594975	-8.89817	5.67733e-19	1.186e-17
LENG8	114823	6509.99	-0.528826	0.05784	-9.14291	6.07957e-20	1.36162e-18
PKIA	5569	595.784	-0.528795	0.0936315	-5.64762	1.62684e-08	1.20065e-07
TMEM106A	113277	296.776	-0.528667	0.134513	-3.93023	8.48639e-05	0.000346231
RHBDD3	25807	615.819	-0.528599	0.0946674	-5.58375	2.35392e-08	1.69692e-07
GALNT18	374378	381.966	-0.528078	0.113747	-4.64256	3.44124e-06	1.81421e-05
CCNE1	898	778.566	-0.527787	0.0807127	-6.53909	6.18961e-11	6.23797e-10
FMN2	56776	3397.62	-0.527546	0.0489303	-10.7816	4.20552e-27	1.50578e-25
CHFR	55743	1485.03	-0.526992	0.0677721	-7.77596	7.488e-15	1.09229e-13
PLEKHM2	23207	6614.16	-0.526884	0.0600385	-8.77577	1.69743e-18	3.43485e-17
TNFRSF6B	8771	286.505	-0.526841	0.122033	-4.31722	1.58009e-05	7.42802e-05
KLC3	147700	674.594	-0.5255	0.0971083	-5.41148	6.2505e-08	4.2516e-07
RIT1	6016	995.004	-0.525309	0.0878195	-5.98168	2.20842e-09	1.84679e-08
UST	10090	3631.7	-0.524202	0.0680261	-7.70589	1.29938e-14	1.85849e-13
SLC35F2	54733	2883.73	-0.523818	0.0559073	-9.3694	7.29485e-21	1.72218e-19
FOXP4	116113	1248.3	-0.523601	0.0736371	-7.11056	1.15572e-12	1.39899e-11
WASH1	100287171	418.494	-0.522441	0.0970384	-5.38386	7.29067e-08	4.9054e-07
CSRNP2	81566	1780.35	-0.522379	0.0620223	-8.42243	3.68744e-17	6.65305e-16
COL18A1	80781	6934.63	-0.522169	0.0646311	-8.07922	6.51846e-16	1.04425e-14
LCAT	3931	530.61	-0.521766	0.0914265	-5.70694	1.15024e-08	8.72021e-08
ATG4D	84971	509.944	-0.521633	0.104744	-4.98005	6.35668e-07	3.75404e-06
ZNF175	7728	732.278	-0.520796	0.0800805	-6.5034	7.8523e-11	7.82709e-10
ERF	2077	2878.73	-0.520595	0.0618392	-8.41853	3.81246e-17	6.85563e-16
INTS6	26512	2043.25	-0.519792	0.0591704	-8.78467	1.56829e-18	3.18951e-17
ZNF778	197320	517.345	-0.519735	0.0877364	-5.92383	3.14525e-09	2.58192e-08
EPHB2	2048	336.25	-0.519508	0.103981	-4.99618	5.84768e-07	3.47163e-06
MTRNR2L1	100462977	1327.32	-0.519499	0.219467	-2.36709	0.0179284	0.041441
KANSL1	284058	1418.14	-0.519316	0.0665939	-7.79825	6.27705e-15	9.23149e-14
SUV420H1	51111	1056.61	-0.519229	0.0729556	-7.11706	1.10254e-12	1.33863e-11
ZNF331	55422	784.254	-0.519053	0.0744349	-6.97324	3.0972e-12	3.5981e-11
FRS2	10818	1614.46	-0.518814	0.0643962	-8.05659	7.84546e-16	1.25063e-14
ZNF440	126070	587.206	-0.518739	0.088004	-5.89449	3.75842e-09	3.03837e-08
ZNF136	7695	240.849	-0.518342	0.129073	-4.01588	5.92238e-05	0.000249896
ZNF528	84436	667.738	-0.518335	0.0857235	-6.0466	1.47938e-09	1.2613e-08
ZNF671	79891	197.959	-0.517115	0.129447	-3.99479	6.47516e-05	0.000270871
NAIF1	203245	356.756	-0.516886	0.105299	-4.90874	9.16644e-07	5.26573e-06
FOSB	2354	479.388	-0.51676	0.102116	-5.06051	4.18141e-07	2.5451e-06
NMB	4828	196.041	-0.51607	0.135082	-3.82042	0.000133223	0.000521775
CHIC2	26511	822.572	-0.515055	0.0780995	-6.59485	4.25692e-11	4.36449e-10
ZNF697	90874	1988.96	-0.514153	0.0606545	-8.47676	2.31553e-17	4.24418e-16
TBC1D4	9882	2011.66	-0.513758	0.0654456	-7.85016	4.15523e-15	6.18991e-14
ZNF703	80139	1074.06	-0.513513	0.0799224	-6.42514	1.31746e-10	1.28624e-09
PNRC1	10957	823.705	-0.512719	0.0873883	-5.86714	4.43388e-09	3.54623e-08
ZNF160	90338	1017.04	-0.512707	0.0977836	-5.24329	1.57742e-07	1.01726e-06
RPS28	6234	145.106	-0.511215	0.150806	-3.3899	0.000699189	0.00233611
SH3BP4	23677	7728.91	-0.510461	0.0521637	-9.78575	1.29625e-22	3.41465e-21
MTSS1	9788	477.095	-0.510137	0.0927175	-5.50206	3.75386e-08	2.64936e-07
PDLIM7	9260	4453.9	-0.51006	0.0540585	-9.43534	3.89731e-21	9.42123e-20
GOPC	57120	3904	-0.509557	0.0613806	-8.3016	1.02716e-16	1.77019e-15
CTHRC1	115908	1411.13	-0.509417	0.0961715	-5.29697	1.17741e-07	7.70058e-07
CAMSAP1	157922	1725.81	-0.509385	0.0774382	-6.57795	4.76978e-11	4.86253e-10
CERK	64781	2985.01	-0.508506	0.0569999	-8.92118	4.6134e-19	9.75095e-18
PABPC1L	80336	696.867	-0.508342	0.0875121	-5.80882	6.29157e-09	4.92946e-08
C5orf30	90355	787.34	-0.508265	0.078552	-6.47043	9.7726e-11	9.68147e-10
DAPK3	1613	2329.72	-0.50777	0.0570175	-8.90552	5.31361e-19	1.1138e-17
ASNS	440	2854.92	-0.506543	0.0564623	-8.97134	2.92918e-19	6.28158e-18
NLRP1	22861	993.761	-0.505686	0.0723324	-6.99115	2.72647e-12	3.18575e-11
ADAMTSL5	339366	325.226	-0.50555	0.120167	-4.20706	2.5871e-05	0.000117747
JMJD6	23210	1886.28	-0.505068	0.0572125	-8.82793	1.06632e-18	2.19071e-17
MYSM1	114803	2468.99	-0.504404	0.0591251	-8.53113	1.44926e-17	2.69927e-16
CEP95	90799	873.45	-0.504382	0.0818496	-6.1623	7.1697e-10	6.40356e-09
UAP1L1	91373	2411.51	-0.504281	0.0537428	-9.38322	6.39878e-21	1.51507e-19
ZNF529	57711	796.504	-0.504169	0.0771017	-6.53902	6.19239e-11	6.23797e-10
FAP	2191	2489.78	-0.50367	0.0553847	-9.09404	9.54263e-20	2.10799e-18
LOC101928841	101928841	2806.55	-0.503477	0.0870875	-5.78128	7.41363e-09	5.76108e-08
TBC1D7	51256	501.394	-0.502546	0.0885943	-5.67244	1.40775e-08	1.04951e-07
ZNF234	10780	565.062	-0.502337	0.0910918	-5.51462	3.49528e-08	2.4766e-07
BRD1	23774	1609.49	-0.502308	0.0725947	-6.91935	4.53728e-12	5.18162e-11
ZNF808	388558	361.345	-0.502057	0.104265	-4.8152	1.47052e-06	8.21373e-06
SMURF1	57154	2370.09	-0.501905	0.055844	-8.98762	2.52635e-19	5.44666e-18
ZCCHC10	54819	560.406	-0.50152	0.0932881	-5.37603	7.61465e-08	5.11061e-07
ZNF557	79230	461.789	-0.501207	0.096388	-5.19989	1.99411e-07	1.27276e-06
AKIRIN2	55122	1824.51	-0.50084	0.0788273	-6.35364	2.10273e-10	2.00917e-09
MT1X	4501	1380.9	-0.50065	0.0743441	-6.73423	1.64799e-11	1.7647e-10
PTGES	9536	1000.67	-0.500605	0.104392	-4.79541	1.62343e-06	9.01174e-06
RENBP	5973	230.826	-0.500443	0.129833	-3.85451	0.000115961	0.000459181
RBAK	57786	905.594	-0.500132	0.0732822	-6.82474	8.80847e-12	9.72908e-11
PAN2	9924	1066.57	-0.499577	0.0834217	-5.98857	2.11694e-09	1.77489e-08
ZNF764	92595	293.825	-0.499144	0.118135	-4.22522	2.38711e-05	0.000109075
RMND5A	64795	1349.6	-0.498344	0.069398	-7.18096	6.9226e-13	8.58573e-12
CCK	885	193.212	-0.498148	0.142414	-3.49789	0.000468955	0.00163416
BCL6	604	2635.89	-0.497266	0.0512015	-9.71195	2.68162e-22	6.88439e-21
PTPRJ	5795	911.53	-0.496886	0.0903853	-5.49742	3.85378e-08	2.70922e-07
RFX8	731220	2054.56	-0.496834	0.07877	-6.30741	2.83751e-10	2.67017e-09
BACH1	571	2484.31	-0.496235	0.0578664	-8.57553	9.86308e-18	1.87817e-16
MAP3K2	10746	2249.56	-0.495962	0.0709191	-6.99334	2.6841e-12	3.14124e-11
MYL9	10398	4417.46	-0.495322	0.0530761	-9.33229	1.03607e-20	2.42119e-19
GPR176	11245	5350.25	-0.493971	0.0496895	-9.94115	2.75619e-23	7.59505e-22
TNIP1	10318	4160.06	-0.49358	0.0513501	-9.61204	7.1123e-22	1.78338e-20
DYNLT1	6993	3190.92	-0.493294	0.0609791	-8.08956	5.98823e-16	9.6505e-15
PINLYP	390940	59.3444	-0.493179	0.213073	-2.3146	0.0206349	0.046806
ADAMTS1	9510	11066.8	-0.493041	0.0752481	-6.5522	5.6694e-11	5.73978e-10
LTBP2	4053	9116.07	-0.492797	0.0668223	-7.37474	1.64671e-13	2.16188e-12
PORCN	64840	2363.55	-0.491974	0.0638642	-7.70343	1.32459e-14	1.8912e-13
COL4A2	1284	17435.3	-0.491896	0.0461216	-10.6652	1.48109e-26	5.12132e-25
MRC2	9902	21560.7	-0.491891	0.0466607	-10.5419	5.53922e-26	1.84427e-24
KANK1	23189	2966.46	-0.491281	0.0798097	-6.15565	7.47699e-10	6.66695e-09
INAFM1	255783	268.819	-0.49116	0.113193	-4.33913	1.43049e-05	6.77803e-05
HKR1	284459	596.505	-0.489997	0.0904182	-5.41923	5.98571e-08	4.08181e-07
PFKFB4	5210	667.496	-0.489984	0.196182	-2.4976	0.0125038	0.0301945
TALDO1	6888	6225.89	-0.489926	0.0545829	-8.97581	2.81278e-19	6.04804e-18
SLC22A17	51310	868.779	-0.489535	0.0833656	-5.87215	4.3019e-09	3.4475e-08
SIPA1L1	26037	3025.9	-0.489397	0.0520524	-9.40201	5.35329e-21	1.275e-19
JUNB	3726	2205.45	-0.488919	0.0719571	-6.79459	1.08623e-11	1.18596e-10
CLCN2	1181	348.556	-0.488809	0.107598	-4.5429	5.54848e-06	2.83176e-05
ZNF253	56242	209.128	-0.488125	0.131067	-3.72425	0.000195895	0.000740128
PYROXD1	79912	586.251	-0.487612	0.0916226	-5.32196	1.02653e-07	6.76312e-07
DNAJB9	4189	846.507	-0.486115	0.0890287	-5.46021	4.75579e-08	3.29599e-07
PTGS1	5742	38956.3	-0.486039	0.0459016	-10.5887	3.36167e-26	1.13804e-24
ARL5B	221079	1772.62	-0.485938	0.064866	-7.49141	6.81375e-14	9.13099e-13
CCNT2	905	1697.36	-0.485819	0.0590149	-8.23213	1.83913e-16	3.11629e-15
ZNF419	79744	218.89	-0.48531	0.134109	-3.61878	0.000295994	0.00107821
CWC25	54883	1163.26	-0.485135	0.0819848	-5.91737	3.27124e-09	2.67599e-08
ZNF827	152485	1194.87	-0.485028	0.0668472	-7.25577	3.99391e-13	5.02679e-12
KCTD15	79047	934.485	-0.484371	0.0743441	-6.51526	7.25629e-11	7.25539e-10
AKR1E2	83592	166.243	-0.484308	0.141025	-3.43419	0.000594324	0.00202471
DUSP4	1846	473.045	-0.4843	0.0990216	-4.89085	1.00402e-06	5.73099e-06
VEGFA	7422	4220.95	-0.484264	0.078576	-6.163	7.1378e-10	6.38213e-09
P4HA2	8974	6025.22	-0.483346	0.0822612	-5.87575	4.20926e-09	3.37829e-08
IL27RA	9466	623.98	-0.483085	0.0848185	-5.69551	1.23002e-08	9.26417e-08
TJAP1	93643	1864.53	-0.483081	0.0825139	-5.85454	4.7834e-09	3.80504e-08
ZNF26	7574	426.795	-0.482417	0.09699	-4.97389	6.56237e-07	3.86749e-06
LAPTM5	7805	188.71	-0.482347	0.13373	-3.60687	0.000309911	0.00112385
ZFP36L1	677	17566.3	-0.482269	0.0565044	-8.53507	1.4007e-17	2.61437e-16
C22orf29	79680	3220.44	-0.482001	0.052877	-9.11552	7.82953e-20	1.73669e-18
SLC44A2	57153	2948.9	-0.481536	0.055928	-8.60993	7.31057e-18	1.40872e-16
RFX1	5989	679.255	-0.481173	0.084407	-5.70063	1.19368e-08	9.01146e-08
ANKZF1	55139	857.555	-0.480939	0.0950195	-5.06148	4.16012e-07	2.53405e-06
WNT5B	81029	7461.28	-0.479828	0.054908	-8.73877	2.35662e-18	4.68077e-17
ACTG1	71	202816	-0.479593	0.0502596	-9.54232	1.39671e-21	3.42768e-20
ZMIZ1	57178	5258.26	-0.479205	0.0630664	-7.59842	2.99773e-14	4.14802e-13
ZNF672	79894	1281	-0.478523	0.0757777	-6.31483	2.70465e-10	2.55407e-09
PLXNA3	55558	4100.3	-0.478271	0.0607658	-7.87073	3.52567e-15	5.30592e-14
BASP1	10409	6765.32	-0.477984	0.0580196	-8.23832	1.74639e-16	2.96538e-15
MALT1	10892	1717.37	-0.47795	0.0644941	-7.41075	1.25587e-13	1.65684e-12
WDR90	197335	1326.18	-0.47791	0.0866526	-5.51524	3.48304e-08	2.46901e-07
PRICKLE2	166336	2169.77	-0.476845	0.100147	-4.76144	1.92218e-06	1.05828e-05
FEZ2	9637	3616.39	-0.476796	0.0513396	-9.2871	1.5855e-20	3.67327e-19
GPATCH2	55105	796.536	-0.4767	0.0801194	-5.94987	2.68348e-09	2.21765e-08
RSRP1	57035	1441.91	-0.476035	0.0690206	-6.897	5.31137e-12	6.01881e-11
MAP1LC3B2	643246	708.558	-0.47601	0.0833773	-5.70911	1.13572e-08	8.61415e-08
CLDN15	24146	306.607	-0.47557	0.10796	-4.40505	1.0576e-05	5.12087e-05
ERRFI1	54206	5422.02	-0.474669	0.0595716	-7.96804	1.61205e-15	2.51026e-14
BRAF	673	1638.97	-0.474013	0.0601691	-7.87802	3.32607e-15	5.03841e-14
LBHD1	79081	135.868	-0.473663	0.157012	-3.01674	0.0025551	0.00744225
ARHGAP24	83478	3431.77	-0.473647	0.0505717	-9.36585	7.54412e-21	1.77584e-19
CLCF1	23529	648.196	-0.473509	0.0930851	-5.08684	3.64079e-07	2.23542e-06
ERBB2IP	55914	4662.79	-0.47349	0.0500046	-9.46894	2.82703e-21	6.88551e-20
KLF11	8462	441.248	-0.473118	0.106888	-4.42631	9.58572e-06	4.68068e-05
TGIF2	60436	542.863	-0.472633	0.0903728	-5.22982	1.69676e-07	1.0903e-06
ZNF410	57862	2019.13	-0.472632	0.0626728	-7.54127	4.65432e-14	6.32643e-13
MAP1LC3B	81631	5655.05	-0.471468	0.0450388	-10.4681	1.21099e-25	3.97459e-24
KIAA1462	57608	5624.15	-0.47069	0.0526977	-8.93189	4.18787e-19	8.90983e-18
DNAJC1	64215	1092.85	-0.470429	0.0675092	-6.96838	3.20611e-12	3.7166e-11
CDH11	1009	2220.59	-0.470359	0.0651034	-7.22479	5.01871e-13	6.25808e-12
RPS6KA1	6195	449.06	-0.469989	0.0917402	-5.12304	3.00656e-07	1.8709e-06
FCHSD2	9873	1423.04	-0.46966	0.0758384	-6.19291	5.90638e-10	5.34021e-09
DCP1A	55802	1607.36	-0.46908	0.0630827	-7.43595	1.03821e-13	1.3787e-12
AGER	177	169.218	-0.468971	0.136704	-3.43057	0.000602321	0.00204592
ZSCAN12	9753	564.456	-0.468426	0.0862372	-5.43183	5.57783e-08	3.82286e-07
L3MBTL3	84456	684.848	-0.468401	0.0835148	-5.6086	2.03973e-08	1.48167e-07
PILRB	29990	371.989	-0.468085	0.109076	-4.29137	1.77577e-05	8.27326e-05
SLC25A37	51312	1723.23	-0.468052	0.0660115	-7.09047	1.33659e-12	1.60829e-11
CORO2A	7464	624.432	-0.467796	0.0811526	-5.7644	8.19478e-09	6.33155e-08
AKAP12	9590	14940.7	-0.467004	0.0494226	-9.4492	3.41423e-21	8.28393e-20
GRK6	2870	1246.1	-0.467003	0.077758	-6.00586	1.90321e-09	1.60486e-08
ZNF845	91664	516.344	-0.466765	0.0868085	-5.37695	7.57598e-08	5.09101e-07
FAM214A	56204	1055.73	-0.466674	0.0696219	-6.70298	2.04216e-11	2.15817e-10
ADCK5	203054	256.196	-0.466564	0.120468	-3.87292	0.000107541	0.000428995
THOC6	79228	602.816	-0.466152	0.0949391	-4.91001	9.10727e-07	5.23546e-06
DNAJC25	548645	776.443	-0.466069	0.078829	-5.91241	3.37135e-09	2.75091e-08
PRPS1	5631	3739.12	-0.465581	0.0504229	-9.23353	2.61868e-20	5.99808e-19
TSC22D1	8848	5830.78	-0.465397	0.0562242	-8.27753	1.25762e-16	2.15355e-15
RBM33	155435	2238.15	-0.464251	0.0618467	-7.50648	6.07402e-14	8.1753e-13
MUS81	80198	1439.43	-0.463355	0.0735115	-6.30316	2.91636e-10	2.73958e-09
FAM219A	203259	970.316	-0.462951	0.0879375	-5.26454	1.40537e-07	9.12028e-07
ULK1	8408	960.432	-0.46254	0.0811018	-5.7032	1.17581e-08	8.88907e-08
SNX30	401548	1683.8	-0.462102	0.0673419	-6.86203	6.78901e-12	7.60256e-11
LIN37	55957	426.926	-0.460691	0.0966312	-4.76751	1.86513e-06	1.02722e-05
MAFK	7975	806.905	-0.460667	0.079151	-5.82011	5.88091e-09	4.62792e-08
GRIA3	2892	286.867	-0.460659	0.137604	-3.34771	0.000814833	0.00268058
KCTD13	253980	402.731	-0.460249	0.104238	-4.41537	1.00837e-05	4.89572e-05
CMTM4	146223	2424.12	-0.459755	0.0736621	-6.2414	4.33661e-10	3.99017e-09
NFATC1	4772	309.936	-0.459507	0.110105	-4.17334	3.00164e-05	0.00013479
CCDC174	51244	560.108	-0.459402	0.0953353	-4.8188	1.44422e-06	8.07523e-06
YY1AP1	55249	2959.07	-0.459146	0.0588093	-7.80736	5.83967e-15	8.61966e-14
FUBP1	8880	5938	-0.459061	0.0540405	-8.49476	1.98348e-17	3.66049e-16
KCNN4	3783	122.468	-0.459004	0.167148	-2.74609	0.00603095	0.0159967
LPCAT2	54947	858.636	-0.458498	0.0776689	-5.90323	3.56444e-09	2.89094e-08
FERMT2	10979	6649.01	-0.458355	0.0444372	-10.3147	6.04827e-25	1.89645e-23
ULBP2	80328	203.586	-0.458148	0.128372	-3.56889	0.000358491	0.00128243
TYRO3	7301	2819.74	-0.457794	0.0607811	-7.53186	5.00242e-14	6.79387e-13
MAP2K1	5604	3867.41	-0.457767	0.0651593	-7.02535	2.13534e-12	2.52242e-11
NPIPB4	440345	111.73	-0.457508	0.168343	-2.7177	0.00657368	0.0172408
ZRSR2	8233	348.599	-0.457023	0.108063	-4.22923	2.34497e-05	0.00010724
ZNF816	125893	273.916	-0.457019	0.11921	-3.83373	0.000126216	0.000496741
ZBTB21	49854	2705.4	-0.457013	0.0620771	-7.36203	1.81135e-13	2.37224e-12
TET2	54790	923.395	-0.456608	0.0732499	-6.23356	4.55952e-10	4.1905e-09
ZNF502	91392	291.913	-0.455955	0.119537	-3.81434	0.000136547	0.00053376
AHSA2	130872	656.779	-0.455633	0.0890317	-5.11764	3.09381e-07	1.91928e-06
JUN	3725	9402.24	-0.455609	0.0601102	-7.57956	3.46718e-14	4.76494e-13
ACAA2	10449	2252.79	-0.455451	0.0580784	-7.84201	4.4339e-15	6.59288e-14
SH3BP5L	80851	4537.61	-0.45493	0.0642109	-7.08492	1.39121e-12	1.67028e-11
FGFRL1	53834	1624.97	-0.454801	0.0687081	-6.61932	3.60848e-11	3.72093e-10
VCPKMT	79609	382.968	-0.453958	0.105193	-4.31547	1.59263e-05	7.48262e-05
POLM	27434	1184.67	-0.453823	0.0693367	-6.54521	5.94121e-11	6.00367e-10
PHF1	5252	937.58	-0.453731	0.0767077	-5.91506	3.31754e-09	2.70975e-08
RNF217	154214	715.874	-0.453709	0.091269	-4.97112	6.65688e-07	3.9189e-06
KLF13	51621	4198.47	-0.453625	0.0610419	-7.43138	1.07471e-13	1.42482e-12
GPN2	54707	938.315	-0.453549	0.0849301	-5.34027	9.28093e-08	6.15223e-07
2005-03-01	54708	2112.41	-0.4522	0.0669144	-6.75789	1.4002e-11	1.5124e-10
SRPX2	27286	2507.21	-0.451905	0.0688262	-6.56588	5.17249e-11	5.25317e-10
LARP1B	55132	1124.51	-0.451266	0.0708756	-6.36702	1.9274e-10	1.8526e-09
NR3C1	2908	6809.08	-0.450559	0.0484853	-9.29268	1.50456e-20	3.49075e-19
CEBPG	1054	1800.97	-0.45032	0.0638953	-7.04778	1.81791e-12	2.16168e-11
PMAIP1	5366	7319.8	-0.450212	0.0756149	-5.95402	2.61636e-09	2.16884e-08
SLC17A9	63910	4013.92	-0.449833	0.0506689	-8.87789	6.814e-19	1.41248e-17
KMT2B	9757	2781.3	-0.449566	0.0611701	-7.34944	1.99045e-13	2.59418e-12
ZNF324	25799	368.166	-0.449368	0.119306	-3.7665	0.00016555	0.00063635
ZNF354B	117608	256.107	-0.449255	0.12179	-3.68878	0.000225333	0.00084112
SEMA7A	8482	9821.15	-0.449213	0.0499747	-8.98881	2.49923e-19	5.39539e-18
A4GALT	53947	724.248	-0.449168	0.0787757	-5.70186	1.18508e-08	8.95077e-08
TMEM91	641649	85.3623	-0.448745	0.184809	-2.42816	0.0151757	0.0358061
AGAP9	642517	115.244	-0.448583	0.165838	-2.70494	0.00683165	0.0178248
FGF1	2246	569.273	-0.448388	0.0964948	-4.64676	3.37197e-06	1.78118e-05
ZNF28	7576	670.303	-0.44789	0.0795221	-5.63227	1.77856e-08	1.30546e-07
TDG	6996	1149.2	-0.447646	0.0654072	-6.84399	7.70157e-12	8.55919e-11
SLC7A6OS	84138	343.784	-0.447559	0.10396	-4.30511	1.669e-05	7.82775e-05
STEAP2	261729	5037.41	-0.445392	0.0616295	-7.22692	4.94061e-13	6.16545e-12
NAPRT	93100	518.926	-0.445229	0.0983857	-4.52534	6.02971e-06	3.05419e-05
ARHGEF19	128272	292.702	-0.445207	0.139388	-3.194	0.00140314	0.00435645
JMJD1C	221037	4006.75	-0.444958	0.0593265	-7.50016	6.37384e-14	8.55567e-13
GMIP	51291	719.631	-0.444949	0.0843728	-5.27361	1.33767e-07	8.69593e-07
IP6K2	51447	1700.74	-0.444873	0.0610378	-7.28848	3.13462e-13	3.99825e-12
RAB40B	10966	308.054	-0.444493	0.106653	-4.16765	3.0776e-05	0.000137927
KLC4	89953	203.962	-0.444385	0.12881	-3.44991	0.000560768	0.00192461
ISYNA1	51477	197.301	-0.444115	0.13821	-3.21333	0.00131208	0.00410449
YRDC	79693	1450.1	-0.443992	0.0724429	-6.12885	8.85138e-10	7.79771e-09
CCDC59	29080	1378.58	-0.443652	0.0778467	-5.69905	1.20478e-08	9.0783e-08
TET3	200424	1497.04	-0.443462	0.0647052	-6.85358	7.20247e-12	8.0266e-11
IRX1	79192	307.611	-0.443461	0.120378	-3.6839	0.000229692	0.000855611
OTUD7B	56957	1962.01	-0.443305	0.0612145	-7.24184	4.42639e-13	5.54518e-12
RARA	5914	1713.9	-0.443249	0.0760353	-5.82952	5.55873e-09	4.38936e-08
ZNF337	26152	766.744	-0.442858	0.0865127	-5.11899	3.07177e-07	1.90854e-06
ZNF304	57343	574.423	-0.442215	0.0903104	-4.89661	9.75054e-07	5.57746e-06
CHTF18	63922	1525.13	-0.442101	0.0857034	-5.1585	2.48931e-07	1.56532e-06
ZNF140	7699	676.029	-0.441837	0.0832715	-5.30598	1.12066e-07	7.35629e-07
NEDD4L	23327	393.809	-0.441518	0.120393	-3.66731	0.000245117	0.000908665
C1orf52	148423	1119.31	-0.44135	0.0662254	-6.66436	2.65829e-11	2.77479e-10
TOR4A	54863	1223.55	-0.441176	0.0712097	-6.19544	5.81209e-10	5.26676e-09
CCDC8	83987	1094.79	-0.440813	0.0765009	-5.7622	8.30261e-09	6.41179e-08
FBXO41	150726	564.573	-0.44073	0.0877055	-5.02511	5.03142e-07	3.02823e-06
GABBR2	9568	6109.31	-0.440607	0.052736	-8.35494	6.54634e-17	1.14903e-15
ANKS3	124401	563.358	-0.440383	0.0859071	-5.12627	2.95538e-07	1.84119e-06
ARNTL	406	856.026	-0.440168	0.0804768	-5.4695	4.51298e-08	3.14119e-07
ZNF485	220992	318.77	-0.439421	0.109666	-4.00692	6.15162e-05	0.000258958
PLEKHG2	64857	1805.68	-0.438894	0.0642574	-6.83025	8.4769e-12	9.38211e-11
SPIRE1	56907	2448.54	-0.4386	0.0544542	-8.05446	7.98306e-16	1.27005e-14
MC1R	4157	253.636	-0.438314	0.12377	-3.54137	0.00039805	0.00140773
PDRG1	81572	849.632	-0.438147	0.0825575	-5.30718	1.11336e-07	7.31652e-07
ABL2	27	13314.3	-0.437914	0.0512313	-8.54778	1.25477e-17	2.3588e-16
CEP83	51134	869.836	-0.437753	0.0739588	-5.91887	3.24162e-09	2.65444e-08
AGO4	192670	539.124	-0.437501	0.0942523	-4.6418	3.4538e-06	1.81964e-05
TXNL4B	54957	909.805	-0.437484	0.0806196	-5.42653	5.74609e-08	3.92503e-07
TSHZ3	57616	1329.26	-0.436711	0.073401	-5.94966	2.68699e-09	2.21941e-08
ARHGEF25	115557	539.875	-0.436619	0.0991885	-4.40191	1.07301e-05	5.19082e-05
ZSCAN21	7589	183.147	-0.436391	0.133131	-3.27791	0.00104578	0.00336116
PLEKHF2	79666	700.095	-0.436259	0.0889066	-4.90694	9.25097e-07	5.3124e-06
ZBTB43	23099	1473.29	-0.435892	0.0737379	-5.91137	3.39284e-09	2.76565e-08
ZNF284	342909	141.405	-0.435843	0.148133	-2.94224	0.00325851	0.00921675
TLR2	7097	3436.81	-0.43512	0.08803	-4.94286	7.69836e-07	4.48749e-06
ARID5A	10865	280.197	-0.435102	0.119071	-3.65414	0.000258049	0.000952887
KDM5C	8242	7435	-0.434996	0.0445869	-9.75614	1.73633e-22	4.52962e-21
FOXO3	2309	4301.94	-0.434873	0.0628827	-6.91561	4.65838e-12	5.3124e-11
ZNF383	163087	242.378	-0.434792	0.128263	-3.38984	0.000699328	0.00233611
AKR1B1	231	7325.38	-0.434403	0.0558089	-7.78375	7.04037e-15	1.02978e-13
CAPN10	11132	609.136	-0.433726	0.0878199	-4.93882	7.85973e-07	4.57201e-06
CORO7	79585	88.5688	-0.433642	0.178755	-2.4259	0.0152706	0.0360143
APBB3	10307	267.164	-0.433545	0.120018	-3.61234	0.000303446	0.00110287
DOT1L	84444	4114.28	-0.433374	0.0544737	-7.95565	1.78188e-15	2.76405e-14
UBOX5	22888	373.621	-0.432635	0.11584	-3.73475	0.000187902	0.000712932
ZNF513	130557	407.965	-0.432101	0.0988261	-4.37234	1.22924e-05	5.89363e-05
SLC9A5	6553	441.201	-0.431927	0.102716	-4.20506	2.61007e-05	0.000118625
ZNF783	100289678	412.138	-0.431896	0.104954	-4.11511	3.86991e-05	0.000169906
RB1CC1	9821	2173.77	-0.431806	0.0629859	-6.85559	7.10182e-12	7.93635e-11
ZNF567	163081	329.137	-0.431294	0.109258	-3.94749	7.89743e-05	0.000324498
SLU7	10569	1644.09	-0.431208	0.06328	-6.8143	9.47255e-12	1.04056e-10
KLHL11	55175	706.323	-0.43087	0.0788318	-5.46569	4.611e-08	3.20665e-07
PTK2B	2185	619.726	-0.430787	0.0818061	-5.26595	1.39464e-07	9.05898e-07
CDKN2AIP	55602	940.665	-0.430502	0.0737183	-5.83983	5.2253e-09	4.14634e-08
UBALD1	124402	552.037	-0.430305	0.0897614	-4.79388	1.63584e-06	9.07752e-06
ZNF720	124411	290.127	-0.430282	0.109504	-3.92936	8.51721e-05	0.000347401
FNBP1L	54874	817.823	-0.430146	0.0752113	-5.71917	1.07043e-08	8.14195e-08
AHRR	57491	2388.29	-0.429629	0.0558315	-7.6951	1.41386e-14	2.01509e-13
KLHL28	54813	466.569	-0.429575	0.0969116	-4.43264	9.30848e-06	4.55633e-05
ZBTB2	57621	1643.62	-0.429367	0.0665287	-6.45385	1.09042e-10	1.07432e-09
ZNF501	115560	202.252	-0.429206	0.133031	-3.22637	0.00125372	0.00394564
TCIRG1	10312	5295.23	-0.428853	0.0527098	-8.13612	4.08154e-16	6.69124e-15
CDC26	246184	277.535	-0.428635	0.119513	-3.58652	0.00033512	0.00120604
PVR	5817	5289.24	-0.428409	0.0633214	-6.76564	1.32724e-11	1.4384e-10
SYNPO	11346	672.433	-0.428114	0.107261	-3.99135	6.56996e-05	0.000274351
ADNP2	22850	1939.75	-0.428036	0.0598055	-7.15714	8.23785e-13	1.01391e-11
MT1M	4499	317.716	-0.427897	0.108003	-3.96188	7.43607e-05	0.000307025
STK19	8859	256.154	-0.426675	0.117061	-3.6449	0.000267496	0.000984252
ZNF558	148156	660.642	-0.426639	0.0789706	-5.40251	6.57164e-08	4.44756e-07
VDR	7421	1386.59	-0.426555	0.0652883	-6.53341	6.429e-11	6.46423e-10
DMTF1	9988	2537.9	-0.426279	0.0599335	-7.11253	1.13935e-12	1.38021e-11
CXXC5	51523	1170.69	-0.426273	0.0849069	-5.02047	5.15441e-07	3.09763e-06
PQLC1	80148	1160.2	-0.425584	0.0703063	-6.05329	1.4192e-09	1.21496e-08
METTL9	51108	15911.7	-0.42555	0.0402559	-10.5711	4.05657e-26	1.35622e-24
EPHB1	2047	915.341	-0.425517	0.0828522	-5.13585	2.80865e-07	1.75519e-06
DZIP1L	199221	373.526	-0.425146	0.0990341	-4.29293	1.76334e-05	8.21772e-05
RFTN1	23180	3251	-0.424826	0.0600606	-7.07328	1.51311e-12	1.80991e-11
CDC42SE1	56882	3743.78	-0.424781	0.0501913	-8.46325	2.60035e-17	4.75005e-16
WAC	51322	5694.82	-0.424269	0.0530618	-7.99576	1.28776e-15	2.01305e-14
RAB24	53917	703.724	-0.423766	0.0814233	-5.20448	1.94544e-07	1.24317e-06
USPL1	10208	1215.21	-0.423386	0.0665087	-6.36587	1.94187e-10	1.8654e-09
IRX2	153572	1201.23	-0.42317	0.0777479	-5.44284	5.24371e-08	3.61089e-07
ZRANB1	54764	2062.9	-0.423037	0.060226	-7.02415	2.15375e-12	2.5423e-11
NAGS	162417	3227.2	-0.422645	0.0500285	-8.44807	2.96148e-17	5.37326e-16
YJEFN3	374887	137.402	-0.422306	0.160857	-2.62536	0.00865586	0.0219323
IRX5	10265	189.912	-0.422256	0.131359	-3.21452	0.00130662	0.00408902
SLC6A6	6533	4799.54	-0.422043	0.14188	-2.97464	0.00293329	0.00840432
GTF2B	2959	1136.62	-0.421876	0.0714222	-5.90678	3.48849e-09	2.84218e-08
ZNF473	25888	710.567	-0.421381	0.0839825	-5.01748	5.23536e-07	3.13927e-06
CTSF	8722	470.534	-0.421379	0.0953318	-4.42013	9.86398e-06	4.7977e-05
BVES	11149	853.554	-0.420791	0.0853889	-4.92793	8.31035e-07	4.80815e-06
FBXL2	25827	311.515	-0.420769	0.12828	-3.28008	0.00103778	0.00333825
KANSL2	54934	1273.05	-0.420678	0.0748953	-5.61687	1.94443e-08	1.41755e-07
ZNF700	90592	447.97	-0.420475	0.115212	-3.64959	0.000262662	0.00096837
FAM214B	80256	1500.42	-0.420382	0.0630102	-6.67165	2.52942e-11	2.65056e-10
SIRPA	140885	2640.83	-0.420316	0.0532454	-7.89393	2.9281e-15	4.46486e-14
RP9	6100	339.154	-0.420166	0.114739	-3.66193	0.00025032	0.000926466
ZNF319	57567	536.906	-0.41978	0.0933512	-4.49678	6.89903e-06	3.46303e-05
SNAI2	6591	6698.19	-0.419755	0.0503834	-8.3312	8.00239e-17	1.39549e-15
FBRSL1	57666	1673.08	-0.419366	0.067333	-6.22824	4.71689e-10	4.33021e-09
CDYL2	124359	1071.66	-0.419331	0.0741015	-5.65887	1.52374e-08	1.12972e-07
TFPT	29844	545.884	-0.419267	0.0895517	-4.68184	2.84311e-06	1.52021e-05
SMARCD3	6604	539.612	-0.419121	0.11114	-3.77111	0.000162526	0.000625915
PWWP2A	114825	894.514	-0.418958	0.0715083	-5.85887	4.66017e-09	3.71067e-08
GATAD2B	57459	1145.82	-0.418957	0.0683622	-6.12849	8.87196e-10	7.81158e-09
ZNF84	7637	1033.98	-0.418665	0.0736556	-5.68409	1.31508e-08	9.84969e-08
BRD4	23476	4010.73	-0.418574	0.0574288	-7.28858	3.13232e-13	3.99825e-12
MROH1	727957	1703.59	-0.418466	0.0631959	-6.62172	3.55039e-11	3.66806e-10
LOXL2	4017	15422.5	-0.418216	0.0437658	-9.55578	1.22653e-21	3.02843e-20
ERO1LB	56605	390.067	-0.418202	0.103461	-4.04213	5.2969e-05	0.000225625
LRP12	29967	1656.61	-0.417947	0.0804037	-5.19811	2.01328e-07	1.28449e-06
NPIPA1	9284	249.736	-0.416834	0.122175	-3.41177	0.000645425	0.00217403
ZNF776	284309	651.811	-0.41662	0.0811438	-5.13434	2.83135e-07	1.76869e-06
SEZ6L2	26470	432.226	-0.416225	0.113543	-3.66581	0.000246561	0.00091339
NFKBIL1	4795	307.647	-0.416057	0.107595	-3.86689	0.000110234	0.000438979
SIAH1	6477	588.753	-0.415843	0.0864503	-4.8102	1.50777e-06	8.41307e-06
WWC2	80014	2883.49	-0.414429	0.0540548	-7.66682	1.76307e-14	2.49519e-13
FXR2	9513	2865.74	-0.413809	0.0530194	-7.80485	5.95706e-15	8.78489e-14
NFYA	4800	2252.71	-0.413506	0.0537311	-7.69584	1.40565e-14	2.00516e-13
CBLL1	79872	1726.54	-0.413384	0.0620427	-6.6629	2.68475e-11	2.8006e-10
CNNM4	26504	653.415	-0.412675	0.085397	-4.83243	1.34878e-06	7.57832e-06
PDE8A	5151	1655.63	-0.412202	0.0593119	-6.94973	3.6599e-12	4.20641e-11
IRGQ	126298	1048.39	-0.41201	0.0739254	-5.57333	2.49921e-08	1.79685e-07
TMEM223	79064	373.884	-0.410722	0.105682	-3.88641	0.000101738	0.000407963
FNBP4	23360	2984.21	-0.410206	0.0498744	-8.22478	1.95553e-16	3.31005e-15
ZSCAN32	54925	665.199	-0.409849	0.0855405	-4.79128	1.65722e-06	9.18351e-06
PQLC2	54896	1041.39	-0.409736	0.0699846	-5.85466	4.77978e-09	3.80403e-08
PER1	5187	2543.57	-0.409505	0.0580155	-7.05854	1.68266e-12	2.01122e-11
SLC15A4	121260	1423.76	-0.40949	0.0626323	-6.538	6.23464e-11	6.27271e-10
PTPN1	5770	9523.16	-0.409449	0.0479992	-8.53032	1.45946e-17	2.71514e-16
NAT9	26151	1561	-0.409157	0.0652567	-6.26997	3.61127e-10	3.36109e-09
USP36	57602	4189.89	-0.406986	0.066819	-6.09088	1.12294e-09	9.77529e-09
IVNS1ABP	10625	4734.08	-0.406664	0.0530606	-7.66413	1.80047e-14	2.54366e-13
HSBP1L1	440498	207.323	-0.406646	0.142654	-2.85059	0.00436388	0.0119518
HRH1	3269	876.423	-0.406466	0.0763463	-5.32397	1.01524e-07	6.69696e-07
ANKRD12	23253	1936.57	-0.406401	0.0596567	-6.81233	9.60283e-12	1.05273e-10
ALAS1	211	4393.5	-0.406281	0.0484787	-8.38062	5.26487e-17	9.35282e-16
ZNF335	63925	1538.07	-0.405552	0.0644988	-6.28775	3.22106e-10	3.01354e-09
RBM39	9584	7805.95	-0.40435	0.0462253	-8.74737	2.18386e-18	4.34833e-17
AMMECR1L	83607	2585.3	-0.40416	0.0527781	-7.65773	1.8925e-14	2.66668e-13
FOXC2	2303	689.047	-0.404155	0.087278	-4.63066	3.64507e-06	1.91479e-05
ZNF224	7767	531.987	-0.404055	0.0885647	-4.56226	5.06058e-06	2.59918e-05
IWS1	55677	3147	-0.403972	0.0544851	-7.41436	1.22209e-13	1.61492e-12
BRD2	6046	11428.7	-0.40343	0.045973	-8.77537	1.7035e-18	3.44281e-17
CHKA	1119	1121.08	-0.40315	0.0687361	-5.86518	4.48656e-09	3.58303e-08
TUBA4A	7277	856.489	-0.402977	0.0924934	-4.35682	1.31966e-05	6.29353e-05
TIMP1	7076	95460.4	-0.402715	0.0410819	-9.80272	1.09594e-22	2.90118e-21
MDM4	4194	956.135	-0.40231	0.0701168	-5.73771	9.59631e-09	7.35459e-08
PCID2	55795	3221.22	-0.402083	0.0546878	-7.35232	1.94791e-13	2.54283e-12
BCL7A	605	625.018	-0.40199	0.0862426	-4.66115	3.14447e-06	1.6681e-05
ZSCAN26	7741	462.938	-0.401695	0.0919056	-4.37074	1.23829e-05	5.93173e-05
KCTD5	54442	2391.94	-0.401602	0.0620653	-6.47064	9.75866e-11	9.67359e-10
NARF	26502	665.687	-0.401534	0.105388	-3.81004	0.000138944	0.00054234
CHST7	56548	413.451	-0.40124	0.114198	-3.51355	0.000442158	0.00154981
DCUN1D2	55208	480.332	-0.400572	0.101126	-3.96112	7.45998e-05	0.000307926
TDRKH	11022	228.666	-0.400226	0.128127	-3.12366	0.00178616	0.00539321
OFD1	8481	978.212	-0.399782	0.0692703	-5.77134	7.86455e-09	6.09682e-08
GALNT15	117248	2739.45	-0.39936	0.0677102	-5.89808	3.6775e-09	2.97815e-08
EAF1	85403	1851.96	-0.399336	0.0635095	-6.2878	3.21986e-10	3.01354e-09
MAPK13	5603	1129.73	-0.398426	0.0714557	-5.57585	2.4632e-08	1.77254e-07
CBLB	868	1289.38	-0.397944	0.0659579	-6.03331	1.60636e-09	1.36308e-08
MTMR11	10903	425.527	-0.397596	0.0962496	-4.13088	3.61378e-05	0.000159746
SIRT7	51547	729.78	-0.397436	0.0884441	-4.49364	7.00168e-06	3.50801e-05
ZNF596	169270	257.4	-0.396976	0.119373	-3.32551	0.000882572	0.00287914
CRAMP1L	57585	1563.93	-0.396966	0.0658264	-6.03051	1.63445e-09	1.38619e-08
ZNF746	155061	1001.28	-0.396907	0.0707528	-5.60977	2.02597e-08	1.473e-07
ZNF354A	6940	401.852	-0.396069	0.110849	-3.57306	0.00035283	0.00126414
GMEB2	26205	1240.32	-0.395836	0.064973	-6.09231	1.11291e-09	9.69323e-09
ERCC2	2068	3137.64	-0.395699	0.0597686	-6.62053	3.5792e-11	3.6931e-10
ITGA5	3678	71674.2	-0.395523	0.0419648	-9.42513	4.29589e-21	1.03229e-19
ZNF444	55311	567.994	-0.394845	0.0855609	-4.61479	3.93498e-06	2.05452e-05
ZNF646	9726	1129.12	-0.394643	0.0660341	-5.97636	2.28181e-09	1.90718e-08
PSPC1	55269	1548.66	-0.394485	0.0764574	-5.15954	2.47554e-07	1.55787e-06
PXDN	7837	9667.77	-0.394473	0.0480695	-8.20629	2.28121e-16	3.80941e-15
JAZF1	221895	1249.02	-0.394079	0.0659415	-5.97619	2.28415e-09	1.90814e-08
C16orf72	29035	5512.94	-0.394063	0.0594638	-6.62693	3.42737e-11	3.54549e-10
FAM131A	131408	701.472	-0.393202	0.0907724	-4.33173	1.47941e-05	6.98931e-05
MMP14	4323	45539.6	-0.393184	0.0705771	-5.57098	2.53308e-08	1.81796e-07
SRSF7	6432	7342.45	-0.392933	0.0530408	-7.40812	1.28106e-13	1.6887e-12
ZNF225	7768	276.896	-0.392774	0.118691	-3.30922	0.000935564	0.0030379
FAM179B	23116	1135.93	-0.39238	0.0668869	-5.86632	4.45578e-09	3.56022e-08
CWC22	57703	1867.57	-0.392192	0.0627573	-6.24935	4.12162e-10	3.80102e-09
CYLD	1540	3791.07	-0.392138	0.0573065	-6.84283	7.76448e-12	8.62316e-11
DACT3	147906	186.622	-0.39204	0.144599	-2.71123	0.00670349	0.0175357
C2CD2L	9854	643.992	-0.391834	0.0847435	-4.62377	3.76828e-06	1.97565e-05
NPR2	4882	4457.93	-0.391834	0.0712257	-5.50129	3.77012e-08	2.65851e-07
SETD5	55209	4710.21	-0.39079	0.0460887	-8.47909	2.26969e-17	4.17437e-16
HECA	51696	928.82	-0.390192	0.0752911	-5.18245	2.18991e-07	1.38786e-06
HCLS1	3059	226.415	-0.390009	0.12408	-3.14321	0.00167108	0.00508185
YPEL5	51646	1548.53	-0.389925	0.0688251	-5.66544	1.46644e-08	1.08924e-07
SMCO4	56935	192.64	-0.38983	0.135622	-2.87439	0.00404807	0.0111683
MSX1	4487	1270.66	-0.389741	0.0705977	-5.52059	3.37867e-08	2.39924e-07
DENND4B	9909	2298.28	-0.389669	0.0598391	-6.51194	7.4186e-11	7.40851e-10
EREG	2069	824.138	-0.389664	0.0779803	-4.99695	5.82434e-07	3.46032e-06
CCNB1IP1	57820	1126.18	-0.389565	0.071276	-5.46559	4.61373e-08	3.20717e-07
STX5	6811	1448.87	-0.389294	0.063459	-6.13457	8.53899e-10	7.54722e-09
ZNF75A	7627	665.788	-0.388616	0.0874093	-4.44593	8.7512e-06	4.30574e-05
HIPK3	10114	2219.16	-0.388209	0.0622761	-6.23367	4.55629e-10	4.18992e-09
SPOCD1	90853	3737.79	-0.387892	0.0719422	-5.39172	6.97861e-08	4.70918e-07
TAF1C	9013	2067.12	-0.387493	0.0641276	-6.04253	1.5172e-09	1.2915e-08
SOWAHC	65124	1655.22	-0.386591	0.0634392	-6.09387	1.1021e-09	9.61466e-09
TCEAL3	85012	793.465	-0.386413	0.0789043	-4.89724	9.71908e-07	5.56341e-06
LOC105377200	105377200	164.971	-0.386338	0.139901	-2.76152	0.00575335	0.015341
NSMCE2	286053	697.225	-0.386224	0.0873549	-4.42132	9.81009e-06	4.77292e-05
SIRT1	23411	1484.92	-0.385306	0.0612263	-6.29314	3.11102e-10	2.91566e-09
PDLIM4	8572	2226.5	-0.3847	0.0633284	-6.07468	1.24234e-09	1.0751e-08
PHYKPL	85007	445.762	-0.384123	0.094086	-4.08268	4.45186e-05	0.000193197
ASB6	140459	2214.83	-0.383954	0.0594538	-6.45803	1.06071e-10	1.04633e-09
NUFIP1	26747	848.679	-0.383919	0.079315	-4.84044	1.29552e-06	7.28414e-06
ZNF267	10308	633.034	-0.383776	0.0804489	-4.77043	1.83829e-06	1.01313e-05
C20orf24	55969	303.714	-0.383742	0.11722	-3.27368	0.00106158	0.00340735
KRCC1	51315	1071.33	-0.38328	0.0680547	-5.63194	1.7819e-08	1.30732e-07
GDI1	2664	6168.34	-0.382772	0.0549124	-6.97058	3.15631e-12	3.6615e-11
FMR1	2332	1950.12	-0.38273	0.0566303	-6.7584	1.39524e-11	1.50805e-10
ZNF431	170959	365.279	-0.382442	0.102494	-3.73135	0.000190455	0.000721941
MICU3	286097	397.368	-0.381705	0.101444	-3.76271	0.00016808	0.000644692
USP37	57695	873.254	-0.381549	0.0857677	-4.44864	8.6416e-06	4.2596e-05
MOSPD2	158747	1059.63	-0.381127	0.0736046	-5.17803	2.24245e-07	1.41893e-06
ESF1	51575	2276.98	-0.380735	0.0692531	-5.49773	3.84721e-08	2.70578e-07
ZNF768	79724	1270.41	-0.380465	0.0656369	-5.79651	6.7709e-09	5.28451e-08
FOXN2	3344	2101.93	-0.380456	0.056715	-6.7082	1.97033e-11	2.08635e-10
FOXL1	2300	853.959	-0.380025	0.0757774	-5.01501	5.30294e-07	3.17155e-06
POP1	10940	1730.33	-0.379729	0.0626037	-6.0656	1.31464e-09	1.1304e-08
LRSAM1	90678	927.001	-0.379637	0.0756361	-5.01926	5.18716e-07	3.11268e-06
ZNF8	7554	269.322	-0.379625	0.115938	-3.27437	0.00105898	0.00340033
SIK3	23387	2100.59	-0.379586	0.0650596	-5.83443	5.39755e-09	4.27253e-08
STK38L	23012	1004.66	-0.378937	0.0856414	-4.42469	9.65791e-06	4.71166e-05
